# Supplementary material for: N 6-Methyladenosine Methylomic Landscape of Lung Tissues in Murine Acute Allergic Asthma
Source: Front Immunol. 2021 Oct 19;12:740571. doi: 10.3389/fimmu.2021.740571 (PMC8560743; doi:10.3389/fimmu.2021.740571)
Supplement: Supplementary file 10 [file Table_10.xlsx]

## Sheet: Sheet1
Table S10. GO enrichment analysis of differentially methylated mRNAs
GO_ID	GO_Term	GO_function	GO_class	Genes	S gene number	TS gene number	B gene number	TB gene number	pvalue
GO:0004930	G protein-coupled receptor activity	molecular_function	6	Gpr183;Gpr174;Ptafr;Fzd10;Gpr160;Gpr21;Ffar1;P2ry12;Fzd2;Prokr1;Ccr9;Bdkrb1;Gpr84;Htr2b;Adra1a;Hrh1;Fpr1;Ccr2;Gpr35;Olfr18	20	451	60	4090	2.8939e-06
GO:0007186	G protein-coupled receptor signaling pathway	biological_process	5	Ccr9;Gpr84;Gpr183;Gpr174;Hrh1;Olfr18;Htr2b;P2ry12;Fzd2;Ccr2;Gpr35;Fzd10;Ffar1;Gpr21;Bhlha15;Prokr1;Gpr160;Bdkrb1;Adra1a;Ptafr;Fpr1	21	451	87	4090	0.000351979
GO:0016021	integral component of membrane	cellular_component	5	St6gal1;Zfp457;Impad1;Syngr1;Zdhhc23;Has2;Clec4a2;Pln;Cplane1;Ggn;Pcdha11;Syne1;Vsig10l;Syt10;Syt13;Bdkrb1;Ints5;Gm49333;Alcam;Trem1;Lyve1;Paqr9;Fam173a;Galnt5;Cd5;Xkrx;Siglece;Ddost;Lrp1;Pla2g6;Rnf133;Ssr1;Cxcl16;Tmem74;Tmem156;Gpr174;Hrh1;Tigit;Pigl;Gramd1b;Cldn4;Gapt;Mthfs;mt-Nd3;Atp8b1;Slc35f6;Fndc5;Fcer2a;Cd8a;Nat8f4;C9;Plpp7;Adam6b;Tor1aip2;AC167036;Lrrn3;4930523C07Rik;Evi2a;mt-Nd4;Tmem268;…	139	451	1003	4090	0.000752863
GO:0008301	DNA binding, bending	molecular_function	7	Lef1;Foxc1;Trex1	3	451	3	4090	0.00133286
GO:0071498	cellular response to fluid shear stress	biological_process	6	Mef2c;Has2;Spp1	3	451	3	4090	0.00133286
GO:0006906	vesicle fusion	biological_process	7	Stx16;Stx19;Syt13;Snph	4	451	7	4090	0.00388934
GO:0070382	exocytic vesicle	cellular_component	8	Syt13;Dpysl3;Syt10;Syt9	4	451	7	4090	0.00388934
GO:0007608	sensory perception of smell	biological_process	8	Fzd2;Syt10;Olfr18;Cfap69	4	451	7	4090	0.00388934
GO:0014059	regulation of dopamine secretion	biological_process	8	Syt9;Syt10;Syt13	3	451	4	4090	0.00489313
GO:0017158	regulation of calcium ion-dependent exocytosis	biological_process	9	Syt10;Syt9;Syt13	3	451	4	4090	0.00489313
GO:1900426	positive regulation of defense response to bacterium	biological_process	8	Grn;Unc13b;Cyba	3	451	4	4090	0.00489313
GO:0030111	regulation of Wnt signaling pathway	biological_process	8	Axin2;Mdfic;Lef1	3	451	4	4090	0.00489313
GO:0003211	cardiac ventricle formation	biological_process	6	Sox11;Mef2c;Mesp1	3	451	4	4090	0.00489313
GO:0071864	positive regulation of cell proliferation in bone marrow	biological_process	8	Shc1;Lef1;Mef2c	3	451	4	4090	0.00489313
GO:0000149	SNARE binding	molecular_function	5	Syt13;Nsf;Stx16;Stx19;Syt10;Syt9	6	451	16	4090	0.00529225
GO:0007596	blood coagulation	biological_process	7	C9;Serpina10;Gp1ba;F10;P2ry12	5	451	12	4090	0.00652991
GO:0051000	positive regulation of nitric-oxide synthase activity	biological_process	9	Dhfr;Fcer2a;Nod1;Htr2b	4	451	8	4090	0.00710583
GO:0007218	neuropeptide signaling pathway	biological_process	6	Qrfp;Scg5;Prokr1	3	451	5	4090	0.0112329
GO:0030346	protein phosphatase 2B binding	molecular_function	8	Ppp3cb;Atp2b4;Akap5	3	451	5	4090	0.0112329
GO:0090037	positive regulation of protein kinase C signaling	biological_process	10	Pla2g6;Sphk2;Adra1a	3	451	5	4090	0.0112329
GO:0045776	negative regulation of blood pressure	biological_process	6	Adipoq;Ptafr;Bdkrb1	3	451	5	4090	0.0112329
GO:0048278	vesicle docking	biological_process	6	Bves;Stx16;Stx19	3	451	5	4090	0.0112329
GO:0006335	DNA replication-dependent nucleosome assembly	biological_process	8	Chaf1a;H3c8;H3c11	3	451	5	4090	0.0112329
GO:0007200	phospholipase C-activating G protein-coupled receptor signaling pathway	biological_process	6	Fpr1;P2ry12;Adra1a;Htr2b	4	451	9	4090	0.0116887
GO:0017156	calcium-ion regulated exocytosis	biological_process	9	Syt10;Ppp3cb;Syt9;Syt13	4	451	9	4090	0.0116887
GO:0007599	hemostasis	biological_process	6	F10;P2ry12;Gp1ba;Serpina10	4	451	9	4090	0.0116887
GO:0015085	calcium ion transmembrane transporter activity	molecular_function	9	Atp2b4;Hrh1	2	451	2	4090	0.0121352
GO:0050501	hyaluronan synthase activity	molecular_function	7	Has2;Has3	2	451	2	4090	0.0121352
GO:0003680	AT DNA binding	molecular_function	9	Mef2c;Hnrnpd	2	451	2	4090	0.0121352
GO:0046548	retinal rod cell development	biological_process	9	Alms1;Rp1	2	451	2	4090	0.0121352
GO:0060119	inner ear receptor cell development	biological_process	7	Fzd2;Atp8b1	2	451	2	4090	0.0121352
GO:0072574	hepatocyte proliferation	biological_process	6	Prox1;Mki67	2	451	2	4090	0.0121352
GO:0005337	nucleoside transmembrane transporter activity	molecular_function	6	Slc29a4;Slc29a3	2	451	2	4090	0.0121352
GO:0045125	bioactive lipid receptor activity	molecular_function	7	Ffar1;Gpr174	2	451	2	4090	0.0121352
GO:0045063	T-helper 1 cell differentiation	biological_process	13	Il18r1;Lef1	2	451	2	4090	0.0121352
GO:0090594	inflammatory response to wounding	biological_process	7	Ccr2;Wdr83	2	451	2	4090	0.0121352
GO:0010133	proline catabolic process to glutamate	biological_process	12	Prodh;Aldh4a1	2	451	2	4090	0.0121352
GO:0060968	regulation of gene silencing	biological_process	8	H3c11;H3c8	2	451	2	4090	0.0121352
GO:1901642	nucleoside transmembrane transport	biological_process	9	Slc29a4;Slc29a3	2	451	2	4090	0.0121352
GO:0014832	urinary bladder smooth muscle contraction	biological_process	9	Pla2g6;Atp2b4	2	451	2	4090	0.0121352
GO:0045226	extracellular polysaccharide biosynthetic process	biological_process	9	Has3;Has2	2	451	2	4090	0.0121352
GO:0030213	hyaluronan biosynthetic process	biological_process	9	Has3;Has2	2	451	2	4090	0.0121352
GO:0045956	positive regulation of calcium ion-dependent exocytosis	biological_process	10	Syt10;Syt9	2	451	2	4090	0.0121352
GO:0021542	dentate gyrus development	biological_process	5	Lef1;Prox1	2	451	2	4090	0.0121352
GO:2000304	positive regulation of ceramide biosynthetic process	biological_process	9	Sphk2;Pla2g6	2	451	2	4090	0.0121352
GO:0006560	proline metabolic process	biological_process	11	Prodh;Aldh4a1	2	451	2	4090	0.0121352
GO:0048791	calcium ion-regulated exocytosis of neurotransmitter	biological_process	10	Syt9;Syt10	2	451	2	4090	0.0121352
GO:0030240	skeletal muscle thin filament assembly	biological_process	7	Prox1;Tcap	2	451	2	4090	0.0121352
GO:0016486	peptide hormone processing	biological_process	8	Scg5;Gm49333	2	451	2	4090	0.0121352
GO:2001054	negative regulation of mesenchymal cell apoptotic process	biological_process	10	Gdf5;Syne1	2	451	2	4090	0.0121352
GO:0010369	chromocenter	cellular_component	7	Sall1;Incenp	2	451	2	4090	0.0121352
GO:0031253	cell projection membrane	cellular_component	5	P2ry12;Bves	2	451	2	4090	0.0121352
GO:0005579	membrane attack complex	cellular_component	6	C9;C6	2	451	2	4090	0.0121352
GO:0008853	exodeoxyribonuclease III activity	molecular_function	10	Trex1;Trex2	2	451	2	4090	0.0121352
GO:0032197	transposition, RNA-mediated	biological_process	5	Trex1;L1td1	2	451	2	4090	0.0121352
GO:0097623	potassium ion export across plasma membrane	biological_process	11	Kcnn4;Kcne3	2	451	2	4090	0.0121352
GO:0007267	cell-cell signaling	biological_process	5	Adra1a;Panx2;Fzd2;Bhlha15;Fgf9;Fgfbp3	6	451	19	4090	0.0134598
GO:0046983	protein dimerization activity	molecular_function	5	Mef2c;Mesp1;Ppp3cb;St13;E2f3;Mesp2;Bhlhe22;Bhlha15;Msc	9	451	37	4090	0.0164939
GO:0007204	positive regulation of cytosolic calcium ion concentration	biological_process	13	Ccr9;Adra1a;Ccr2;Pla2g6;Lrp1;Gpr35;Fpr1;Ffar1;Fzd2	9	451	37	4090	0.0164939
GO:0019905	syntaxin binding	molecular_function	6	Nsf;Syt10;Stx16;Unc13b;Syt9	5	451	15	4090	0.0187259
GO:0000987	proximal promoter sequence-specific DNA binding	molecular_function	9	Zbtb7b;Uhrf1;Mef2c;Sox11;E2f3;Lef1;Mesp1	7	451	26	4090	0.0192741
GO:0045494	photoreceptor cell maintenance	biological_process	4	Bbs10;Cln8;Rp1	3	451	6	4090	0.0206405
GO:0005249	voltage-gated potassium channel activity	molecular_function	9	Kcng1;Lrrc55;Kcne3	3	451	6	4090	0.0206405
GO:0043401	steroid hormone mediated signaling pathway	biological_process	6	Pgr;Lef1;Paqr7	3	451	6	4090	0.0206405
GO:0002089	lens morphogenesis in camera-type eye	biological_process	5	Prox1;Nectin1;Sox11	3	451	6	4090	0.0206405
GO:0045907	positive regulation of vasoconstriction	biological_process	10	Hrh1;Ptafr;Adra1a;Shc1	4	451	11	4090	0.0255966
GO:0060021	roof of mouth development	biological_process	5	Tfap2a;Mef2c;Msc;Bcor;Cplane1;Gdf11	6	451	22	4090	0.0278492
GO:0005125	cytokine activity	molecular_function	7	Gdf11;Spp1;Sectm1b;Cxcl16;Inha;Grn;Gdf5;Il7	8	451	34	4090	0.0281243
GO:0007165	signal transduction	biological_process	4	Gpr160;Fzd10;Sectm1b;Rapgef6;Olfr18;Adra1a;Il7;Htr2b;Fpr1;Arhgap24;Prokr1;Hrh1;Fzd2;P2ry12;Pcnt;Adipoq;Rhebl1;Gpr35;Ptafr;Gpr183;Ccr9;Shc1;Plch2;Spp1;Rassf10;Grn;Ccr2;Gpr174;Bdkrb1;Akap5;Il18r1;Irak4;Ffar1;Cxcl16;Pilra;Arhgap45;Fndc5;Gpr21;Gkap1	39	451	262	4090	0.0285107
GO:0008017	microtubule binding	molecular_function	7	Cenpf;Tubgcp6;Stard9;Lzts1;Snph;Tppp;Rp1;Ccdc88b;Vash2;Kifc1;Ska2;Neil2;Mtus2;Alms1;Spef1l	15	451	81	4090	0.029138
GO:0001822	kidney development	biological_process	6	Foxc1;Tfap2a;Sox11;Cplane1;Trex1;Sall1;Zfp354a;Cenpf;Prox1;Has2	10	451	47	4090	0.0292226
GO:0060326	cell chemotaxis	biological_process	6	Saa3;Gpr183;Lef1;Ccr2;Ccr9	5	451	17	4090	0.0320824
GO:0021549	cerebellum development	biological_process	5	Hnrnpd;Cdk5r1;Cplane1;mt-Nd4;Foxc1	5	451	17	4090	0.0320824
GO:0001938	positive regulation of endothelial cell proliferation	biological_process	9	Vash2;Cyba;Prkca;Htr2b;Prox1	5	451	17	4090	0.0320824
GO:0044853	plasma membrane raft	cellular_component	7	Cd8a;Myo1a;Has2	3	451	7	4090	0.0332039
GO:0060339	negative regulation of type I interferon-mediated signaling pathway	biological_process	10	Cnot7;Trex1;Samhd1	3	451	7	4090	0.0332039
GO:0003139	secondary heart field specification	biological_process	8	Mesp1;Mef2c;Axin2	3	451	7	4090	0.0332039
GO:0014850	response to muscle activity	biological_process	5	Postn;Perm1;Fndc5	3	451	7	4090	0.0332039
GO:0017075	syntaxin-1 binding	molecular_function	7	Nsf;Snph;Unc13b	3	451	7	4090	0.0332039
GO:0010880	regulation of release of sequestered calcium ion into cytosol by sarcoplasmic reticulum	biological_process	8	Pln;Trdn;Hrc	3	451	7	4090	0.0332039
GO:0014898	cardiac muscle hypertrophy in response to stress	biological_process	6	Tcap;Mef2c	2	451	3	4090	0.03374
GO:0032927	positive regulation of activin receptor signaling pathway	biological_process	10	Zc3h3;Fgf9	2	451	3	4090	0.03374
GO:0061014	positive regulation of mRNA catabolic process	biological_process	9	Cnot7;Cnot1	2	451	3	4090	0.03374
GO:0030854	positive regulation of granulocyte differentiation	biological_process	10	Lef1;Runx1	2	451	3	4090	0.03374
GO:0030015	CCR4-NOT core complex	cellular_component	4	Cnot7;Cnot1	2	451	3	4090	0.03374
GO:0031115	negative regulation of microtubule polymerization	biological_process	10	Stmn1;Tubb4a	2	451	3	4090	0.03374
GO:0098780	response to mitochondrial depolarisation	biological_process	6	Sqstm1;Ambra1	2	451	3	4090	0.03374
GO:1904753	negative regulation of vascular associated smooth muscle cell migration	biological_process	10	Adipoq;Mef2c	2	451	3	4090	0.03374
GO:0043631	RNA polyadenylation	biological_process	9	Papolb;Papola	2	451	3	4090	0.03374
GO:2000481	positive regulation of cAMP-dependent protein kinase activity	biological_process	13	Atp2b4;Adipoq	2	451	3	4090	0.03374
GO:0048341	paraxial mesoderm formation	biological_process	7	Lef1;Foxc1	2	451	3	4090	0.03374
GO:0097470	ribbon synapse	cellular_component	4	Unc13b;Pclo	2	451	3	4090	0.03374
GO:0070886	positive regulation of calcineurin-NFAT signaling cascade	biological_process	12	Akap5;3425401B19Rik	2	451	3	4090	0.03374
GO:0046622	positive regulation of organ growth	biological_process	8	Il7;Ybx3	2	451	3	4090	0.03374
GO:0019835	cytolysis	biological_process	4	C6;C9	2	451	3	4090	0.03374
GO:1901029	negative regulation of mitochondrial outer membrane permeabilization involved in apoptotic signaling pathway	biological_process	10	Gclc;Slc35f6	2	451	3	4090	0.03374
GO:0060022	hard palate development	biological_process	5	Fzd2;Sox11	2	451	3	4090	0.03374
GO:0000788	nuclear nucleosome	cellular_component	6	H3c11;H3c8	2	451	3	4090	0.03374
GO:0006956	complement activation	biological_process	5	Cr1l;C6	2	451	3	4090	0.03374
GO:0036122	BMP binding	molecular_function	6	Gdf5;Tcap	2	451	3	4090	0.03374
GO:0008361	regulation of cell size	biological_process	6	Lamtor4;Cln8	2	451	3	4090	0.03374
GO:1902081	negative regulation of calcium ion import into sarcoplasmic reticulum	biological_process	9	Pln;Hrc	2	451	3	4090	0.03374
GO:0007199	G protein-coupled receptor signaling pathway coupled to cGMP nucleotide second messenger	biological_process	7	Gkap1;Fzd2	2	451	3	4090	0.03374
GO:0032635	interleukin-6 production	biological_process	5	Wdr83;Sphk2	2	451	3	4090	0.03374
GO:0008296	3'-5'-exodeoxyribonuclease activity	molecular_function	9	Trex1;Trex2	2	451	3	4090	0.03374
GO:0014032	neural crest cell development	biological_process	7	Sox11;Foxc1	2	451	3	4090	0.03374
GO:0061635	regulation of protein complex stability	biological_process	5	Sqstm1;Trex1	2	451	3	4090	0.03374
GO:0003007	heart morphogenesis	biological_process	6	Alpk2;Mesp1;Trex1;Asxl1;Htr2b;Foxc1	6	451	23	4090	0.0342878
GO:0071805	potassium ion transmembrane transport	biological_process	10	Kcnk12;Kcng1;Kcnn4;Lrrc55;Kcne3;P2ry12	6	451	23	4090	0.0342878
GO:0070098	chemokine-mediated signaling pathway	biological_process	7	Ccr9;Foxc1;Gpr35;Ccr2	4	451	12	4090	0.0351299
GO:0005267	potassium channel activity	molecular_function	8	Kcng1;Kcnk12;Kcnn4;Kcne3	4	451	12	4090	0.0351299
GO:0031667	response to nutrient levels	biological_process	6	Ambra1;Cyba;Prox1;Adipoq;Sord	5	451	18	4090	0.0405254
GO:0006334	nucleosome assembly	biological_process	7	Padi4;Tspyl3;Chaf1a;Nap1l5;H3c8;H3c11	6	451	24	4090	0.0416147
GO:0030017	sarcomere	cellular_component	5	Mef2c;Sqstm1;Tcap;Syne1	4	451	13	4090	0.0464477
GO:0000981	DNA-binding transcription factor activity, RNA polymerase II-specific	molecular_function	5	Sox11;Foxo6;Tfap2a;Foxc1;E2f3;Msc;Lef1;Zfp523;Mef2c;Prox1;Zfhx4;Foxq1;Bhlhe22;Msx3	14	451	79	4090	0.0477791
GO:0005657	replication fork	cellular_component	6	Rad18;Rtf2;Uhrf1	3	451	8	4090	0.0488627
GO:0007205	protein kinase C-activating G protein-coupled receptor signaling pathway	biological_process	6	Htr2b;Lrp1;Bdkrb1	3	451	8	4090	0.0488627
GO:0009653	anatomical structure morphogenesis	biological_process	4	Foxc1;Foxq1;Sox11	3	451	8	4090	0.0488627
GO:0030285	integral component of synaptic vesicle membrane	cellular_component	7	Stx16;Syt9;Syngr1	3	451	8	4090	0.0488627
GO:0005496	steroid binding	molecular_function	5	Pgr;Paqr7;Paqr9	3	451	8	4090	0.0488627
GO:0005198	structural molecule activity	molecular_function	3	Krt23;Cldn24;Cldn4;Bves;Panx2	5	451	19	4090	0.0501916
GO:0006935	chemotaxis	biological_process	5	Ptafr;Pla2g6;Fpr1;Ccr9;Ccr2;Cxcl16	6	451	26	4090	0.0590316
GO:0007052	mitotic spindle organization	biological_process	9	Pcnt;Stmn1;Nuf2;Gpsm2	4	451	14	4090	0.0595478
GO:0005044	scavenger receptor activity	molecular_function	4	Fcrls;Cd5;Cxcl16;Scara5	4	451	14	4090	0.0595478
GO:0002374	cytokine secretion involved in immune response	biological_process	12	Trem1;Sphk2	2	451	4	4090	0.0625869
GO:0007276	gamete generation	biological_process	5	Ggn;Spin4	2	451	4	4090	0.0625869
GO:1905516	positive regulation of fertilization	biological_process	7	Ccdc87;Cfap69	2	451	4	4090	0.0625869
GO:0070269	pyroptosis	biological_process	6	Naip2;Zbp1	2	451	4	4090	0.0625869
GO:0014033	neural crest cell differentiation	biological_process	7	Htr2b;Mef2c	2	451	4	4090	0.0625869
GO:0030322	stabilization of membrane potential	biological_process	6	Kcnk12;Kcnn4	2	451	4	4090	0.0625869
GO:0030033	microvillus assembly	biological_process	8	Rapgef6;Myo1a	2	451	4	4090	0.0625869
GO:0098831	presynaptic active zone cytoplasmic component	cellular_component	4	Unc13b;Pclo	2	451	4	4090	0.0625869
GO:0055008	cardiac muscle tissue morphogenesis	biological_process	7	Tcap;Xirp2	2	451	4	4090	0.0625869
GO:0043292	contractile fiber	cellular_component	6	Dek;Cdk5r1	2	451	4	4090	0.0625869
GO:0046653	tetrahydrofolate metabolic process	biological_process	7	Dhfr;Mthfs	2	451	4	4090	0.0625869
GO:0007512	adult heart development	biological_process	7	Adra1a;Tcap	2	451	4	4090	0.0625869
GO:0072711	cellular response to hydroxyurea	biological_process	7	Trex1;Rtf2	2	451	4	4090	0.0625869
GO:0050796	regulation of insulin secretion	biological_process	10	Syt9;Ppp3cb	2	451	4	4090	0.0625869
GO:0046632	alpha-beta T cell differentiation	biological_process	9	Bcl11b;Lef1	2	451	4	4090	0.0625869
GO:0018279	protein N-linked glycosylation via asparagine	biological_process	11	St6gal1;Ddost	2	451	4	4090	0.0625869
GO:0030101	natural killer cell activation	biological_process	7	Ulbp1;Il18r1	2	451	4	4090	0.0625869
GO:0008250	oligosaccharyltransferase complex	cellular_component	7	Ddost;Trex1	2	451	4	4090	0.0625869
GO:0007187	G protein-coupled receptor signaling pathway, coupled to cyclic nucleotide second messenger	biological_process	6	Htr2b;Hrh1	2	451	4	4090	0.0625869
GO:0004652	polynucleotide adenylyltransferase activity	molecular_function	8	Papola;Papolb	2	451	4	4090	0.0625869
GO:0010842	retina layer formation	biological_process	5	Obsl1;Tfap2a	2	451	4	4090	0.0625869
GO:0031123	RNA 3'-end processing	biological_process	10	Papola;Papolb	2	451	4	4090	0.0625869
GO:0010216	maintenance of DNA methylation	biological_process	8	Uhrf1;Zfp57	2	451	4	4090	0.0625869
GO:0033691	sialic acid binding	molecular_function	7	Adipoq;Siglece	2	451	4	4090	0.0625869
GO:0051482	positive regulation of cytosolic calcium ion concentration involved in phospholipase C-activating G protein-coupled signaling pathway	biological_process	14	Gpr35;Gpr174	2	451	4	4090	0.0625869
GO:0016446	somatic hypermutation of immunoglobulin genes	biological_process	6	Aicda;Samhd1	2	451	4	4090	0.0625869
GO:0070016	armadillo repeat domain binding	molecular_function	6	Cnot1;Lef1	2	451	4	4090	0.0625869
GO:0098664	G protein-coupled serotonin receptor signaling pathway	biological_process	6	Hrh1;Htr2b	2	451	4	4090	0.0625869
GO:0004993	G protein-coupled serotonin receptor activity	molecular_function	8	Htr2b;Hrh1	2	451	4	4090	0.0625869
GO:0031493	nucleosomal histone binding	molecular_function	6	Sphk2;Uhrf1	2	451	4	4090	0.0625869
GO:0071837	HMG box domain binding	molecular_function	6	Utf1;Mef2c	2	451	4	4090	0.0625869
GO:0045777	positive regulation of blood pressure	biological_process	6	Qrfp;Cyba	2	451	4	4090	0.0625869
GO:0033153	T cell receptor V(D)J recombination	biological_process	7	Lef1;Bcl11b	2	451	4	4090	0.0625869
GO:0090382	phagosome maturation	biological_process	6	Rab43;Unc13b	2	451	4	4090	0.0625869
GO:0000423	mitophagy	biological_process	8	Sqstm1;Ambra1	2	451	4	4090	0.0625869
GO:0085029	extracellular matrix assembly	biological_process	6	Has3;Has2	2	451	4	4090	0.0625869
GO:0048172	regulation of short-term neuronal synaptic plasticity	biological_process	11	Unc13b;Syngr1	2	451	4	4090	0.0625869
GO:1903238	positive regulation of leukocyte tethering or rolling	biological_process	9	Ccr2;Ptafr	2	451	4	4090	0.0625869
GO:0005251	delayed rectifier potassium channel activity	molecular_function	10	Kcng1;Kcne3	2	451	4	4090	0.0625869
GO:0005542	folic acid binding	molecular_function	5	Mthfs;Dhfr	2	451	4	4090	0.0625869
GO:0055010	ventricular cardiac muscle tissue morphogenesis	biological_process	8	Prox1;Foxc1	2	451	4	4090	0.0625869
GO:0010613	positive regulation of cardiac muscle hypertrophy	biological_process	10	Adra1a;Mef2c	2	451	4	4090	0.0625869
GO:0007155	cell adhesion	biological_process	4	Fat2;Bves;Postn;Vcan;Rpsa;Omd;Cldn24;Lyve1;Pcdhga11;Gp1ba;Siglece;Nectin1;Vinac1;Ly9;Spp1;Sorbs3;Pcdha11;Tnc;Pcdhga3;Cldn4;Alcam	21	451	135	4090	0.0632286
GO:0005720	nuclear heterochromatin	cellular_component	8	Zfp57;Foxc1;Uhrf1	3	451	9	4090	0.0674498
GO:0070469	respirasome	cellular_component	4	Cycs;mt-Nd3;mt-Nd4	3	451	9	4090	0.0674498
GO:0048255	mRNA stabilization	biological_process	11	Hnrnpd;Tent5a;Axin2	3	451	9	4090	0.0674498
GO:0005179	hormone activity	molecular_function	7	Fndc5;Adipoq;Inha	3	451	9	4090	0.0674498
GO:0048704	embryonic skeletal system morphogenesis	biological_process	7	Mef2c;Sox11;Pcgf2	3	451	9	4090	0.0674498
GO:0014911	positive regulation of smooth muscle cell migration	biological_process	9	Pgr;Has2;Postn	3	451	9	4090	0.0674498
GO:0070555	response to interleukin-1	biological_process	7	Cyba;Gclc;Prkca	3	451	9	4090	0.0674498
GO:0045824	negative regulation of innate immune response	biological_process	8	Grn;Ifi202b;Nmi	3	451	9	4090	0.0674498
GO:0005887	integral component of plasma membrane	cellular_component	6	Pcdhga3;Has3;Ffar1;Calhm6;Htr2b;Kcnn4;Tmc5;Pcdha11;Adra1a;Ccr2;Gp1ba;Has2;Alcam;Pcdhga11;Hrh1;Atp2b4;Gpr35;Scara5;Syt13;Fcrls;Ulbp1;Gpr174;Psen2;Kcnk12;Prokr1;P2ry12;Cldn4	27	451	183	4090	0.0675327
GO:0031594	neuromuscular junction	cellular_component	4	Postn;Pclo;Syngr1;Cdk5r1;Unc13b	5	451	21	4090	0.073229
GO:0001786	phosphatidylserine binding	molecular_function	6	Syt9;Syt10;Syt13;Gramd1b	4	451	15	4090	0.0743921
GO:0004527	exonuclease activity	molecular_function	7	Pld4;Trex2;Trex1;Cnot7	4	451	15	4090	0.0743921
GO:0005544	calcium-dependent phospholipid binding	molecular_function	6	Syt10;Syt13;Pclo;Syt9	4	451	15	4090	0.0743921
GO:0035458	cellular response to interferon-beta	biological_process	8	Trex1;Gm12185;Ifi202b;Ifi213	4	451	15	4090	0.0743921
GO:0031966	mitochondrial membrane	cellular_component	5	Snph;mt-Nd3;Ngrn;Degs1;mt-Nd4;Prkca;Pln;Sord;Fam173a	9	451	48	4090	0.0755272
GO:0007275	multicellular organism development	biological_process	4	Arc;Foxc1;Fgf9;Cnot1;Prr15;Mesp1;Fzd10;Stmn1;Mycbpap;Gm38655;Spry1;Cr1l;Zfp354a;Arhgap24;Paqr7;Bves;Zfp57;Ngrn;Dkk2;Tssk1;Ambra1;Zfp335;Msx3;Txndc8;Prox1;Sox11;Ggn;Fzd2;Mef2c;Zbtb7b;Bcl11b	31	451	218	4090	0.0788743
GO:0019722	calcium-mediated signaling	biological_process	7	Bhlha15;Alms1;Ccr9;Ccr2;P2ry12;Htr2b	6	451	28	4090	0.0802018
GO:0045087	innate immune response	biological_process	5	Clec4a2;Ly9;Ptk6;C9;C6;Zbp1;Nod1;Oasl2;Cr1l;Cyba;Trim17;Ifi202b;Irak4;Trex1;Naip2;Samhd1;Pld4;Padi4;Wfdc17	19	451	124	4090	0.0841783
GO:0004950	chemokine receptor activity	molecular_function	8	Gpr35;Ccr2;Ccr9	3	451	10	4090	0.088724
GO:0006959	humoral immune response	biological_process	5	Ccr2;Gpr183;Mef2c	3	451	10	4090	0.088724
GO:0090501	RNA phosphodiester bond hydrolysis	biological_process	9	Ear1;Samhd1;Rpp21	3	451	10	4090	0.088724
GO:0012501	programmed cell death	biological_process	5	Alkbh7;Relt;Zbp1	3	451	10	4090	0.088724
GO:0045296	cadherin binding	molecular_function	6	Vinac1;Akap5;Cdk5r1	3	451	10	4090	0.088724
GO:0006958	complement activation, classical pathway	biological_process	6	C9;Cr1l;C6	3	451	10	4090	0.088724
GO:1903078	positive regulation of protein localization to plasma membrane	biological_process	10	Sqstm1;Lrp1;Atp2b4;Akap5	4	451	16	4090	0.0909121
GO:0006955	immune response	biological_process	4	Ccr9;C9;Il7;C6;Ccr2;Gm43302;Sectm1b;Trex1;Oasl2	9	451	50	4090	0.0929462
GO:0030014	CCR4-NOT complex	cellular_component	4	Cnot1;Cnot7	2	451	5	4090	0.0968229
GO:0045446	endothelial cell differentiation	biological_process	7	Mesp1;Prox1	2	451	5	4090	0.0968229
GO:0045921	positive regulation of exocytosis	biological_process	8	Pla2g6;Unc13b	2	451	5	4090	0.0968229
GO:0060314	regulation of ryanodine-sensitive calcium-release channel activity	biological_process	10	Pln;Hrc	2	451	5	4090	0.0968229
GO:0045910	negative regulation of DNA recombination	biological_process	10	Rtel1;Rad18	2	451	5	4090	0.0968229
GO:0035082	axoneme assembly	biological_process	9	Jhy;Rp1	2	451	5	4090	0.0968229
GO:0003300	cardiac muscle hypertrophy	biological_process	8	Htr2b;Tcap	2	451	5	4090	0.0968229
GO:0030594	neurotransmitter receptor activity	molecular_function	5	Hrh1;Htr2b	2	451	5	4090	0.0968229
GO:0045028	G protein-coupled purinergic nucleotide receptor activity	molecular_function	8	P2ry12;Ptafr	2	451	5	4090	0.0968229
GO:0006953	acute-phase response	biological_process	8	Saa3;Serpina1b	2	451	5	4090	0.0968229
GO:0001921	positive regulation of receptor recycling	biological_process	7	Bves;Nsf	2	451	5	4090	0.0968229
GO:0071398	cellular response to fatty acid	biological_process	7	Smarcd1;Ptafr	2	451	5	4090	0.0968229
GO:0071872	cellular response to epinephrine stimulus	biological_process	9	Atp2b4;Adipoq	2	451	5	4090	0.0968229
GO:0007202	activation of phospholipase C activity	biological_process	11	Htr2b;Adra1a	2	451	5	4090	0.0968229
GO:0010832	negative regulation of myotube differentiation	biological_process	10	Plpp7;Bhlha15	2	451	5	4090	0.0968229
GO:0004535	poly(A)-specific ribonuclease activity	molecular_function	10	Cnot1;Cnot7	2	451	5	4090	0.0968229
GO:0005504	fatty acid binding	molecular_function	5	Acox3;Ffar1	2	451	5	4090	0.0968229
GO:0008137	NADH dehydrogenase (ubiquinone) activity	molecular_function	8	mt-Nd4;mt-Nd3	2	451	5	4090	0.0968229
GO:0035589	G protein-coupled purinergic nucleotide receptor signaling pathway	biological_process	7	P2ry12;Ptafr	2	451	5	4090	0.0968229
GO:0014003	oligodendrocyte development	biological_process	7	Tppp;Sox11	2	451	5	4090	0.0968229
GO:0031110	regulation of microtubule polymerization or depolymerization	biological_process	8	Stmn1;Ska2	2	451	5	4090	0.0968229
GO:0005747	mitochondrial respiratory chain complex I	cellular_component	7	mt-Nd4;mt-Nd3	2	451	5	4090	0.0968229
GO:0051963	regulation of synapse assembly	biological_process	6	Nectin1;Mef2c	2	451	5	4090	0.0968229
GO:0048678	response to axon injury	biological_process	6	Dpysl3;P2ry12	2	451	5	4090	0.0968229
GO:0070131	positive regulation of mitochondrial translation	biological_process	11	Ngrn;Rpusd3	2	451	5	4090	0.0968229
GO:0048545	response to steroid hormone	biological_process	6	Paqr7;Spp1	2	451	5	4090	0.0968229
GO:0010818	T cell chemotaxis	biological_process	7	Cxcl16;Gpr183	2	451	5	4090	0.0968229
GO:0097746	regulation of blood vessel diameter	biological_process	8	Gclc;Foxc1	2	451	5	4090	0.0968229
GO:0051310	metaphase plate congression	biological_process	8	Incenp;Cenpf	2	451	5	4090	0.0968229
GO:0001946	lymphangiogenesis	biological_process	5	Prox1;Ppp3cb	2	451	5	4090	0.0968229
GO:0030148	sphingolipid biosynthetic process	biological_process	9	Degs1;Cers5	2	451	5	4090	0.0968229
GO:0031589	cell-substrate adhesion	biological_process	5	Fat2;Sorbs3	2	451	5	4090	0.0968229
GO:0060090	molecular adaptor activity	molecular_function	4	Pcnt;Akap5;Smarcd1;Lamtor4;Cnot1	5	451	23	4090	0.101101
GO:0016323	basolateral plasma membrane	cellular_component	5	Atp2b4;Nod1;Lrp1;Alpk2;Kcnn4;Slc29a4;Akap5;Myo1a;Cr1l	9	451	51	4090	0.102468
GO:0005509	calcium ion binding	molecular_function	7	Prrg4;Lrp1;Tubb4a;Pcdhga11;Unc13b;Syt10;Ninl;F10;Plch2;Cdk5r1;Pcdhga3;Rcn3;Padi4;Pcdha11;Syt9;Cetn4;Clec4a2;Fat2;Hrc;Tchh;Ppp3cb;Vcan;Syt13;Pclo	24	451	167	4090	0.102583
GO:0042742	defense response to bacterium	biological_process	8	Naip2;Nod1;Aicda;Shc1;Gm43302;Cebpe	6	451	30	4090	0.105079
GO:0042593	glucose homeostasis	biological_process	8	Alms1;Ffar1;Adipoq;Gpr21;Bhlha15;Foxo6	6	451	30	4090	0.105079
GO:0009612	response to mechanical stimulus	biological_process	5	Gdf5;Tnc;Postn;Bdkrb1	4	451	17	4090	0.109013
GO:0031514	motile cilium	cellular_component	5	Sord;Atp2b4;Tssk1;Cfap69	4	451	17	4090	0.109013
GO:0043377	negative regulation of CD8-positive, alpha-beta T cell differentiation	biological_process	12	Zbtb7b	1	451	1	4090	0.110269
GO:0008817	cob(I)yrinic acid a,c-diamide adenosyltransferase activity	molecular_function	6	Mmab	1	451	1	4090	0.110269
GO:0060023	soft palate development	biological_process	5	Sox11	1	451	1	4090	0.110269
GO:1902943	positive regulation of voltage-gated chloride channel activity	biological_process	10	Ptafr	1	451	1	4090	0.110269
GO:2001135	regulation of endocytic recycling	biological_process	8	Bves	1	451	1	4090	0.110269
GO:1990678	histone H4-K16 deacetylation	biological_process	13	Hdac9	1	451	1	4090	0.110269
GO:0060101	negative regulation of phagocytosis, engulfment	biological_process	9	Siglece	1	451	1	4090	0.110269
GO:0035359	negative regulation of peroxisome proliferator activated receptor signaling pathway	biological_process	9	Asxl1	1	451	1	4090	0.110269
GO:1903249	negative regulation of citrulline biosynthetic process	biological_process	11	Atp2b4	1	451	1	4090	0.110269
GO:0001906	cell killing	biological_process	3	C9	1	451	1	4090	0.110269
GO:0044298	cell body membrane	cellular_component	5	P2ry12	1	451	1	4090	0.110269
GO:1904300	positive regulation of transcytosis	biological_process	7	Ptafr	1	451	1	4090	0.110269
GO:2001013	epithelial cell proliferation involved in renal tubule morphogenesis	biological_process	5	Mef2c	1	451	1	4090	0.110269
GO:0016272	prefoldin complex	cellular_component	4	Pfdn1	1	451	1	4090	0.110269
GO:0070073	clustering of voltage-gated calcium channels	biological_process	7	Akap5	1	451	1	4090	0.110269
GO:1902979	mitotic DNA replication termination	biological_process	11	Rtf2	1	451	1	4090	0.110269
GO:0046526	D-xylulose reductase activity	molecular_function	7	Sord	1	451	1	4090	0.110269
GO:1903353	regulation of nucleus organization	biological_process	8	Syne1	1	451	1	4090	0.110269
GO:0071502	cellular response to temperature stimulus	biological_process	6	Htr2b	1	451	1	4090	0.110269
GO:0045155	electron transporter, transferring electrons from CoQH2-cytochrome c reductase complex and cytochrome c oxidase complex activity	molecular_function	6	Cycs	1	451	1	4090	0.110269
GO:0016533	protein kinase 5 complex	cellular_component	9	Cdk5r1	1	451	1	4090	0.110269
GO:0044729	hemi-methylated DNA-binding	molecular_function	8	Uhrf1	1	451	1	4090	0.110269
GO:1905145	cellular response to acetylcholine	biological_process	7	Atp2b4	1	451	1	4090	0.110269
GO:0047016	cholest-5-ene-3-beta,7-alpha-diol 3-beta-dehydrogenase activity	molecular_function	7	Hsd3b7	1	451	1	4090	0.110269
GO:0097535	lymphoid lineage cell migration into thymus	biological_process	8	Bcl11b	1	451	1	4090	0.110269
GO:1904535	positive regulation of telomeric loop disassembly	biological_process	11	Rtel1	1	451	1	4090	0.110269
GO:0021873	forebrain neuroblast division	biological_process	9	Lef1	1	451	1	4090	0.110269
GO:0071357	cellular response to type I interferon	biological_process	8	Trex1	1	451	1	4090	0.110269
GO:0098736	negative regulation of the force of heart contraction	biological_process	10	Atp2b4	1	451	1	4090	0.110269
GO:0090310	negative regulation of methylation-dependent chromatin silencing	biological_process	8	Aicda	1	451	1	4090	0.110269
GO:0008254	3'-nucleotidase activity	molecular_function	9	Impad1	1	451	1	4090	0.110269
GO:0036145	dendritic cell homeostasis	biological_process	5	Gpr183	1	451	1	4090	0.110269
GO:0002839	positive regulation of immune response to tumor cell	biological_process	9	Ulbp1	1	451	1	4090	0.110269
GO:0001985	negative regulation of heart rate involved in baroreceptor response to increased systemic arterial blood pressure	biological_process	11	Adra1a	1	451	1	4090	0.110269
GO:0045916	negative regulation of complement activation	biological_process	8	Cr1l	1	451	1	4090	0.110269
GO:0031629	synaptic vesicle fusion to presynaptic active zone membrane	biological_process	9	Stx19	1	451	1	4090	0.110269
GO:0015734	taurine transport	biological_process	10	Slc36a1	1	451	1	4090	0.110269
GO:0035564	regulation of kidney size	biological_process	6	Asxl1	1	451	1	4090	0.110269
GO:0042541	hemoglobin biosynthetic process	biological_process	8	Inha	1	451	1	4090	0.110269
GO:0004947	bradykinin receptor activity	molecular_function	7	Bdkrb1	1	451	1	4090	0.110269
GO:0008274	gamma-tubulin ring complex	cellular_component	6	Tubgcp6	1	451	1	4090	0.110269
GO:0035481	positive regulation of Notch signaling pathway involved in heart induction	biological_process	10	Mesp1	1	451	1	4090	0.110269
GO:0035403	histone kinase activity (H3-T6 specific)	molecular_function	10	Prkca	1	451	1	4090	0.110269
GO:0061912	selective autophagy	biological_process	8	Sqstm1	1	451	1	4090	0.110269
GO:0002313	mature B cell differentiation involved in immune response	biological_process	9	Gpr183	1	451	1	4090	0.110269
GO:0006060	sorbitol metabolic process	biological_process	9	Sord	1	451	1	4090	0.110269
GO:0033034	positive regulation of myeloid cell apoptotic process	biological_process	10	Adipoq	1	451	1	4090	0.110269
GO:0035526	retrograde transport, plasma membrane to Golgi	biological_process	7	Rab43	1	451	1	4090	0.110269
GO:0042448	progesterone metabolic process	biological_process	8	Dhrs9	1	451	1	4090	0.110269
GO:0035701	hematopoietic stem cell migration	biological_process	7	Bcl11b	1	451	1	4090	0.110269
GO:1901978	positive regulation of cell cycle checkpoint	biological_process	7	Prox1	1	451	1	4090	0.110269
GO:0048505	regulation of timing of cell differentiation	biological_process	7	Fgf9	1	451	1	4090	0.110269
GO:0043372	positive regulation of CD4-positive, alpha-beta T cell differentiation	biological_process	12	Zbtb7b	1	451	1	4090	0.110269
GO:0047844	deoxycytidine deaminase activity	molecular_function	7	Aicda	1	451	1	4090	0.110269
GO:1900082	negative regulation of arginine catabolic process	biological_process	10	Atp2b4	1	451	1	4090	0.110269
GO:1900363	regulation of mRNA polyadenylation	biological_process	10	Zc3h3	1	451	1	4090	0.110269
GO:0031646	positive regulation of neurological system process	biological_process	8	Fgfbp3	1	451	1	4090	0.110269
GO:0006450	regulation of translational fidelity	biological_process	5	Yrdc	1	451	1	4090	0.110269
GO:0002194	hepatocyte cell migration	biological_process	7	Prox1	1	451	1	4090	0.110269
GO:0001004	RNA polymerase III transcription regulator recruiting activity	molecular_function	7	Gtf3c3	1	451	1	4090	0.110269
GO:0060975	cardioblast migration to the midline involved in heart field formation	biological_process	10	Mesp1	1	451	1	4090	0.110269
GO:0090265	positive regulation of immune complex clearance by monocytes and macrophages	biological_process	8	Ccr2	1	451	1	4090	0.110269
GO:1900121	negative regulation of receptor binding	biological_process	8	Adipoq	1	451	1	4090	0.110269
GO:1905673	positive regulation of lysosome organization	biological_process	10	Grn	1	451	1	4090	0.110269
GO:0060850	regulation of transcription involved in cell fate commitment	biological_process	10	Zbtb7b	1	451	1	4090	0.110269
GO:0002760	positive regulation of antimicrobial humoral response	biological_process	8	Acod1	1	451	1	4090	0.110269
GO:0006222	UMP biosynthetic process	biological_process	12	Uckl1	1	451	1	4090	0.110269
GO:0098845	postsynaptic endosome	cellular_component	8	Arc	1	451	1	4090	0.110269
GO:0060913	cardiac cell fate determination	biological_process	6	Mesp1	1	451	1	4090	0.110269
GO:0010574	regulation of vascular endothelial growth factor production	biological_process	7	Ccr2	1	451	1	4090	0.110269
GO:0009744	response to sucrose	biological_process	8	Adipoq	1	451	1	4090	0.110269
GO:0045092	interleukin-18 receptor complex	cellular_component	6	Il18r1	1	451	1	4090	0.110269
GO:1990385	meiotic spindle midzone	cellular_component	7	Incenp	1	451	1	4090	0.110269
GO:0043513	inhibin B complex	cellular_component	5	Inha	1	451	1	4090	0.110269
GO:0061181	regulation of chondrocyte development	biological_process	8	Axin2	1	451	1	4090	0.110269
GO:0090660	cerebrospinal fluid circulation	biological_process	8	Jhy	1	451	1	4090	0.110269
GO:1903241	U2-type prespliceosome assembly	biological_process	10	Sf3a3	1	451	1	4090	0.110269
GO:0014707	branchiomeric skeletal muscle development	biological_process	7	Msc	1	451	1	4090	0.110269
GO:0010808	positive regulation of synaptic vesicle priming	biological_process	8	Unc13b	1	451	1	4090	0.110269
GO:0072354	histone kinase activity (H3-T3 specific)	molecular_function	10	Haspin	1	451	1	4090	0.110269
GO:0043310	negative regulation of eosinophil degranulation	biological_process	10	Ccr2	1	451	1	4090	0.110269
GO:2000111	positive regulation of macrophage apoptotic process	biological_process	11	Mef2c	1	451	1	4090	0.110269
GO:0042501	serine phosphorylation of STAT protein	biological_process	11	Cdk5r1	1	451	1	4090	0.110269
GO:0005388	ATPase-coupled calcium transmembrane transporter activity	molecular_function	10	Atp2b4	1	451	1	4090	0.110269
GO:0060732	positive regulation of inositol phosphate biosynthetic process	biological_process	10	Ptafr	1	451	1	4090	0.110269
GO:0004983	neuropeptide Y receptor activity	molecular_function	8	Prokr1	1	451	1	4090	0.110269
GO:0036117	hyaluranon cable	cellular_component	4	Has3	1	451	1	4090	0.110269
GO:0022894	Intermediate conductance calcium-activated potassium channel activity	molecular_function	10	Kcnn4	1	451	1	4090	0.110269
GO:1902524	positive regulation of protein K48-linked ubiquitination	biological_process	13	Nmi	1	451	1	4090	0.110269
GO:2001057	reactive nitrogen species metabolic process	biological_process	5	Prdx5	1	451	1	4090	0.110269
GO:0051871	dihydrofolic acid binding	molecular_function	7	Dhfr	1	451	1	4090	0.110269
GO:0006707	cholesterol catabolic process	biological_process	9	Hsd3b7	1	451	1	4090	0.110269
GO:1903561	extracellular vesicle	cellular_component	6	Arc	1	451	1	4090	0.110269
GO:0003210	cardiac atrium formation	biological_process	6	Mesp1	1	451	1	4090	0.110269
GO:0021808	cytosolic calcium signaling involved in initiation of cell movement in glial-mediated radial cell migration	biological_process	8	P2ry12	1	451	1	4090	0.110269
GO:0002251	organ or tissue specific immune response	biological_process	5	Trex1	1	451	1	4090	0.110269
GO:2000979	positive regulation of forebrain neuron differentiation	biological_process	11	Prox1	1	451	1	4090	0.110269
GO:0071791	chemokine (C-C motif) ligand 5 binding	molecular_function	8	Ccr2	1	451	1	4090	0.110269
GO:0003259	cardioblast anterior-lateral migration	biological_process	10	Mesp1	1	451	1	4090	0.110269
GO:1990705	cholangiocyte proliferation	biological_process	5	Mki67	1	451	1	4090	0.110269
GO:0048769	sarcomerogenesis	biological_process	9	Tcap	1	451	1	4090	0.110269
GO:0002457	T cell antigen processing and presentation	biological_process	5	Trex1	1	451	1	4090	0.110269
GO:1904015	cellular response to serotonin	biological_process	8	Htr2b	1	451	1	4090	0.110269
GO:0000225	N-acetylglucosaminylphosphatidylinositol deacetylase activity	molecular_function	7	Pigl	1	451	1	4090	0.110269
GO:0006710	androgen catabolic process	biological_process	8	Spp1	1	451	1	4090	0.110269
GO:0110097	regulation of calcium import into the mitochondrion	biological_process	11	Psen2	1	451	1	4090	0.110269
GO:0051599	response to hydrostatic pressure	biological_process	5	Atp2b4	1	451	1	4090	0.110269
GO:0034971	histone H3-R17 methylation	biological_process	13	Carm1	1	451	1	4090	0.110269
GO:0035332	positive regulation of hippo signaling	biological_process	10	Sox11	1	451	1	4090	0.110269
GO:0090322	regulation of superoxide metabolic process	biological_process	8	Shc1	1	451	1	4090	0.110269
GO:0044316	cone cell pedicle	cellular_component	7	Pclo	1	451	1	4090	0.110269
GO:0099525	presynaptic dense core vesicle exocytosis	biological_process	11	Unc13b	1	451	1	4090	0.110269
GO:0002470	plasmacytoid dendritic cell antigen processing and presentation	biological_process	6	Clec4a2	1	451	1	4090	0.110269
GO:0002312	B cell activation involved in immune response	biological_process	8	Gpr183	1	451	1	4090	0.110269
GO:0070126	mitochondrial translational termination	biological_process	9	Mtrf1l	1	451	1	4090	0.110269
GO:1904628	cellular response to phorbol 13-acetate 12-myristate	biological_process	7	Sphk2	1	451	1	4090	0.110269
GO:0003185	sinoatrial valve morphogenesis	biological_process	6	Mef2c	1	451	1	4090	0.110269
GO:0070172	positive regulation of tooth mineralization	biological_process	10	Tfap2a	1	451	1	4090	0.110269
GO:0042664	negative regulation of endodermal cell fate specification	biological_process	10	Mesp1	1	451	1	4090	0.110269
GO:0097350	neutrophil clearance	biological_process	5	Ccr2	1	451	1	4090	0.110269
GO:1905247	positive regulation of aspartic-type peptidase activity	biological_process	11	Grn	1	451	1	4090	0.110269
GO:0014895	smooth muscle hypertrophy	biological_process	8	Cyba	1	451	1	4090	0.110269
GO:0061470	T follicular helper cell differentiation	biological_process	13	Gpr183	1	451	1	4090	0.110269
GO:0036416	tRNA stabilization	biological_process	11	Trdmt1	1	451	1	4090	0.110269
GO:0006855	drug transmembrane transport	biological_process	7	Atp8b1	1	451	1	4090	0.110269
GO:0050291	sphingosine N-acyltransferase activity	molecular_function	8	Cers5	1	451	1	4090	0.110269
GO:0015247	aminophospholipid transmembrane transporter activity	molecular_function	6	Atp8b1	1	451	1	4090	0.110269
GO:0034739	histone deacetylase activity (H4-K16 specific)	molecular_function	8	Hdac9	1	451	1	4090	0.110269
GO:0140253	cell-cell fusion	biological_process	4	Vash2	1	451	1	4090	0.110269
GO:0072395	signal transduction involved in cell cycle checkpoint	biological_process	6	Sox11	1	451	1	4090	0.110269
GO:0061669	spontaneous neurotransmitter secretion	biological_process	7	Unc13b	1	451	1	4090	0.110269
GO:0090317	negative regulation of intracellular protein transport	biological_process	9	Adipoq	1	451	1	4090	0.110269
GO:0000217	DNA secondary structure binding	molecular_function	7	Clspn	1	451	1	4090	0.110269
GO:0070858	negative regulation of bile acid biosynthetic process	biological_process	11	Prox1	1	451	1	4090	0.110269
GO:1904303	positive regulation of maternal process involved in parturition	biological_process	7	Ptafr	1	451	1	4090	0.110269
GO:0048787	presynaptic active zone membrane	cellular_component	5	Stx19	1	451	1	4090	0.110269
GO:0140261	BCOR complex	cellular_component	7	Bcor	1	451	1	4090	0.110269
GO:0009262	deoxyribonucleotide metabolic process	biological_process	9	Rrm2	1	451	1	4090	0.110269
GO:0021512	spinal cord anterior/posterior patterning	biological_process	7	Gdf11	1	451	1	4090	0.110269
GO:0003106	negative regulation of glomerular filtration by angiotensin	biological_process	13	Cyba	1	451	1	4090	0.110269
GO:0035754	B cell chemotaxis	biological_process	7	Hsd3b7	1	451	1	4090	0.110269
GO:0035995	detection of muscle stretch	biological_process	7	Tcap	1	451	1	4090	0.110269
GO:0007284	spermatogonial cell division	biological_process	5	Zfp449	1	451	1	4090	0.110269
GO:1904071	presynaptic active zone assembly	biological_process	6	Pclo	1	451	1	4090	0.110269
GO:0086092	regulation of the force of heart contraction by cardiac conduction	biological_process	10	Pln	1	451	1	4090	0.110269
GO:0035781	CD86 biosynthetic process	biological_process	9	Trex1	1	451	1	4090	0.110269
GO:0060940	epithelial to mesenchymal transition involved in cardiac fibroblast development	biological_process	9	Spry1	1	451	1	4090	0.110269
GO:1905538	polysome binding	molecular_function	6	Ybx3	1	451	1	4090	0.110269
GO:0048788	cytoskeleton of presynaptic active zone	cellular_component	8	Pclo	1	451	1	4090	0.110269
GO:0006534	cysteine metabolic process	biological_process	10	Gclc	1	451	1	4090	0.110269
GO:0031064	negative regulation of histone deacetylation	biological_process	11	Sphk2	1	451	1	4090	0.110269
GO:0070602	regulation of centromeric sister chromatid cohesion	biological_process	10	Axin2	1	451	1	4090	0.110269
GO:0044317	rod spherule	cellular_component	6	Pclo	1	451	1	4090	0.110269
GO:1990774	tumor necrosis factor secretion	biological_process	12	Sphk2	1	451	1	4090	0.110269
GO:0016964	alpha-2 macroglobulin receptor activity	molecular_function	4	Lrp1	1	451	1	4090	0.110269
GO:0051935	glutamate reuptake	biological_process	13	Cln8	1	451	1	4090	0.110269
GO:0003835	beta-galactoside alpha-2,6-sialyltransferase activity	molecular_function	7	St6gal1	1	451	1	4090	0.110269
GO:0008275	gamma-tubulin small complex	cellular_component	5	Tubgcp6	1	451	1	4090	0.110269
GO:0051160	L-xylitol catabolic process	biological_process	10	Sord	1	451	1	4090	0.110269
GO:0051257	meiotic spindle midzone assembly	biological_process	6	Incenp	1	451	1	4090	0.110269
GO:0060180	female mating behavior	biological_process	6	Pgr	1	451	1	4090	0.110269
GO:0072321	chaperone-mediated protein transport	biological_process	10	Timm13	1	451	1	4090	0.110269
GO:0060928	atrioventricular node cell development	biological_process	10	Maml1	1	451	1	4090	0.110269
GO:0061153	trachea gland development	biological_process	7	Lef1	1	451	1	4090	0.110269
GO:0010389	regulation of G2/M transition of mitotic cell cycle	biological_process	9	Cenpf	1	451	1	4090	0.110269
GO:0048213	Golgi vesicle prefusion complex stabilization	biological_process	8	Dnajc28	1	451	1	4090	0.110269
GO:0060739	mesenchymal-epithelial cell signaling involved in prostate gland development	biological_process	4	Tnc	1	451	1	4090	0.110269
GO:0045065	cytotoxic T cell differentiation	biological_process	9	Cd8a	1	451	1	4090	0.110269
GO:0016081	synaptic vesicle docking	biological_process	8	Unc13b	1	451	1	4090	0.110269
GO:0090500	endocardial cushion to mesenchymal transition	biological_process	9	Has2	1	451	1	4090	0.110269
GO:0044375	regulation of peroxisome size	biological_process	6	Pex11g	1	451	1	4090	0.110269
GO:0097195	pilomotor reflex	biological_process	6	Adra1a	1	451	1	4090	0.110269
GO:0014701	junctional sarcoplasmic reticulum membrane	cellular_component	7	Trdn	1	451	1	4090	0.110269
GO:0071307	cellular response to vitamin K	biological_process	10	Postn	1	451	1	4090	0.110269
GO:0040034	regulation of development, heterochronic	biological_process	6	Gm10282	1	451	1	4090	0.110269
GO:0070435	Shc-EGFR complex	cellular_component	6	Shc1	1	451	1	4090	0.110269
GO:0016428	tRNA (cytosine-5-)-methyltransferase activity	molecular_function	10	Trdmt1	1	451	1	4090	0.110269
GO:0017109	glutamate-cysteine ligase complex	cellular_component	6	Gclc	1	451	1	4090	0.110269
GO:0042030	ATPase inhibitor activity	molecular_function	6	Pln	1	451	1	4090	0.110269
GO:0007208	phospholipase C-activating serotonin receptor signaling pathway	biological_process	7	Htr2b	1	451	1	4090	0.110269
GO:0001609	G protein-coupled adenosine receptor activity	molecular_function	7	P2ry12	1	451	1	4090	0.110269
GO:0097186	amelogenesis	biological_process	8	Relt	1	451	1	4090	0.110269
GO:1900106	positive regulation of hyaluranon cable assembly	biological_process	7	Has3	1	451	1	4090	0.110269
GO:0009235	cobalamin metabolic process	biological_process	7	Mmab	1	451	1	4090	0.110269
GO:0001970	positive regulation of activation of membrane attack complex	biological_process	9	C6	1	451	1	4090	0.110269
GO:0045145	single-stranded DNA 5'-3' exodeoxyribonuclease activity	molecular_function	11	Pld4	1	451	1	4090	0.110269
GO:0035408	histone H3-T6 phosphorylation	biological_process	12	Prkca	1	451	1	4090	0.110269
GO:0021861	forebrain radial glial cell differentiation	biological_process	8	Lef1	1	451	1	4090	0.110269
GO:0030666	endocytic vesicle membrane	cellular_component	7	Scara5	1	451	1	4090	0.110269
GO:0003692	left-handed Z-DNA binding	molecular_function	8	Zbp1	1	451	1	4090	0.110269
GO:0065001	specification of axis polarity	biological_process	5	Bcor	1	451	1	4090	0.110269
GO:0016793	triphosphoric monoester hydrolase activity	molecular_function	7	Samhd1	1	451	1	4090	0.110269
GO:0001016	RNA polymerase III regulatory region DNA binding	molecular_function	8	Prdx5	1	451	1	4090	0.110269
GO:0016286	small conductance calcium-activated potassium channel activity	molecular_function	10	Kcnn4	1	451	1	4090	0.110269
GO:0043315	positive regulation of neutrophil degranulation	biological_process	10	Ptafr	1	451	1	4090	0.110269
GO:0050262	ribosylnicotinamide kinase activity	molecular_function	7	Nmrk2	1	451	1	4090	0.110269
GO:1904056	positive regulation of cholangiocyte proliferation	biological_process	9	Cdc25a	1	451	1	4090	0.110269
GO:0031427	response to methotrexate	biological_process	6	Dhfr	1	451	1	4090	0.110269
GO:1903765	negative regulation of potassium ion export across plasma membrane	biological_process	12	Kcne3	1	451	1	4090	0.110269
GO:0005280	amino acid:proton symporter activity	molecular_function	9	Slc36a1	1	451	1	4090	0.110269
GO:1990828	hepatocyte dedifferentiation	biological_process	6	Hnrnpd	1	451	1	4090	0.110269
GO:0043267	negative regulation of potassium ion transport	biological_process	10	Akap5	1	451	1	4090	0.110269
GO:0004992	platelet activating factor receptor activity	molecular_function	7	Ptafr	1	451	1	4090	0.110269
GO:0071418	cellular response to amine stimulus	biological_process	8	Htr2b	1	451	1	4090	0.110269
GO:0031231	intrinsic component of peroxisomal membrane	cellular_component	6	Pex11g	1	451	1	4090	0.110269
GO:0048211	Golgi vesicle docking	biological_process	7	Nsf	1	451	1	4090	0.110269
GO:0046882	negative regulation of follicle-stimulating hormone secretion	biological_process	10	Inha	1	451	1	4090	0.110269
GO:0070171	negative regulation of tooth mineralization	biological_process	10	Bcor	1	451	1	4090	0.110269
GO:0071482	cellular response to light stimulus	biological_process	7	Rp1	1	451	1	4090	0.110269
GO:0015824	proline transport	biological_process	8	Slc36a1	1	451	1	4090	0.110269
GO:0000732	strand displacement	biological_process	8	Rtel1	1	451	1	4090	0.110269
GO:0051418	microtubule nucleation by microtubule organizing center	biological_process	9	Tppp	1	451	1	4090	0.110269
GO:0060785	regulation of apoptosis involved in tissue homeostasis	biological_process	9	Prdx5	1	451	1	4090	0.110269
GO:0009609	response to symbiotic bacterium	biological_process	8	Ptafr	1	451	1	4090	0.110269
GO:2000458	regulation of astrocyte chemotaxis	biological_process	8	Gpr183	1	451	1	4090	0.110269
GO:0016445	somatic diversification of immunoglobulins	biological_process	5	Aicda	1	451	1	4090	0.110269
GO:1905223	epicardium morphogenesis	biological_process	5	Alpk2	1	451	1	4090	0.110269
GO:0046619	optic placode formation involved in camera-type eye formation	biological_process	7	Prox1	1	451	1	4090	0.110269
GO:0036487	nitric-oxide synthase inhibitor activity	molecular_function	6	Atp2b4	1	451	1	4090	0.110269
GO:0071374	cellular response to parathyroid hormone stimulus	biological_process	7	Mef2c	1	451	1	4090	0.110269
GO:0097505	Rad6-Rad18 complex	cellular_component	6	Rad18	1	451	1	4090	0.110269
GO:0051381	histamine binding	molecular_function	5	Hrh1	1	451	1	4090	0.110269
GO:0031914	negative regulation of synaptic plasticity	biological_process	10	Unc13b	1	451	1	4090	0.110269
GO:1990817	RNA adenylyltransferase activity	molecular_function	9	Tent5a	1	451	1	4090	0.110269
GO:0051164	L-xylitol metabolic process	biological_process	9	Sord	1	451	1	4090	0.110269
GO:0097752	regulation of DNA stability	biological_process	5	Rtf2	1	451	1	4090	0.110269
GO:0061114	branching involved in pancreas morphogenesis	biological_process	7	Prox1	1	451	1	4090	0.110269
GO:0033008	positive regulation of mast cell activation involved in immune response	biological_process	9	Sphk2	1	451	1	4090	0.110269
GO:1901355	response to rapamycin	biological_process	7	Hnrnpd	1	451	1	4090	0.110269
GO:0007610	behavior	biological_process	3	Htr2b	1	451	1	4090	0.110269
GO:0051900	regulation of mitochondrial depolarization	biological_process	7	Gclc	1	451	1	4090	0.110269
GO:0003228	atrial cardiac muscle tissue development	biological_process	5	Trex1	1	451	1	4090	0.110269
GO:0002407	dendritic cell chemotaxis	biological_process	6	Gpr183	1	451	1	4090	0.110269
GO:0036132	13-prostaglandin reductase activity	molecular_function	7	Zadh2	1	451	1	4090	0.110269
GO:0046452	dihydrofolate metabolic process	biological_process	7	Dhfr	1	451	1	4090	0.110269
GO:0004357	glutamate-cysteine ligase activity	molecular_function	7	Gclc	1	451	1	4090	0.110269
GO:0072010	glomerular epithelium development	biological_process	9	Foxc1	1	451	1	4090	0.110269
GO:0002383	immune response in brain or nervous system	biological_process	6	Trex1	1	451	1	4090	0.110269
GO:0014827	intestine smooth muscle contraction	biological_process	9	Htr2b	1	451	1	4090	0.110269
GO:0014012	peripheral nervous system axon regeneration	biological_process	8	Tnc	1	451	1	4090	0.110269
GO:0004657	proline dehydrogenase activity	molecular_function	6	Prodh	1	451	1	4090	0.110269
GO:1902259	regulation of delayed rectifier potassium channel activity	biological_process	9	Kcng1	1	451	1	4090	0.110269
GO:0031727	CCR2 chemokine receptor binding	molecular_function	9	Ccr2	1	451	1	4090	0.110269
GO:1904383	response to sodium phosphate	biological_process	6	Hnrnpd	1	451	1	4090	0.110269
GO:0050795	regulation of behavior	biological_process	5	Htr2b	1	451	1	4090	0.110269
GO:0060989	lipid tube assembly involved in organelle fusion	biological_process	9	Pcdhga3	1	451	1	4090	0.110269
GO:0055005	ventricular cardiac myofibril assembly	biological_process	9	Prox1	1	451	1	4090	0.110269
GO:0055013	cardiac muscle cell development	biological_process	8	Alpk2	1	451	1	4090	0.110269
GO:0018101	protein citrullination	biological_process	11	Padi4	1	451	1	4090	0.110269
GO:0035634	response to stilbenoid	biological_process	7	Saa3	1	451	1	4090	0.110269
GO:0075341	host cell PML body	cellular_component	7	Cnot7	1	451	1	4090	0.110269
GO:0030203	glycosaminoglycan metabolic process	biological_process	7	Foxc1	1	451	1	4090	0.110269
GO:0042662	negative regulation of mesodermal cell fate specification	biological_process	10	Mesp1	1	451	1	4090	0.110269
GO:0019363	pyridine nucleotide biosynthetic process	biological_process	8	Nmrk2	1	451	1	4090	0.110269
GO:1905671	regulation of lysosome organization	biological_process	9	Trex1	1	451	1	4090	0.110269
GO:0032567	dGTP binding	molecular_function	9	Samhd1	1	451	1	4090	0.110269
GO:0035655	interleukin-18-mediated signaling pathway	biological_process	7	Il18r1	1	451	1	4090	0.110269
GO:0070383	DNA cytosine deamination	biological_process	10	Aicda	1	451	1	4090	0.110269
GO:1902548	negative regulation of cellular response to vascular endothelial growth factor stimulus	biological_process	8	Atp2b4	1	451	1	4090	0.110269
GO:0015917	aminophospholipid transport	biological_process	9	Atp8b1	1	451	1	4090	0.110269
GO:0036413	histone H3-R26 citrullination	biological_process	11	Padi4	1	451	1	4090	0.110269
GO:0017004	cytochrome complex assembly	biological_process	8	Cyba	1	451	1	4090	0.110269
GO:0070293	renal absorption	biological_process	6	Cldn4	1	451	1	4090	0.110269
GO:0036345	platelet maturation	biological_process	6	Slfn14	1	451	1	4090	0.110269
GO:0015828	tyrosine transport	biological_process	8	Slc36a1	1	451	1	4090	0.110269
GO:0042284	sphingolipid delta-4 desaturase activity	molecular_function	6	Degs1	1	451	1	4090	0.110269
GO:0002724	regulation of T cell cytokine production	biological_process	10	Ccr2	1	451	1	4090	0.110269
GO:0070080	titin Z domain binding	molecular_function	6	Tcap	1	451	1	4090	0.110269
GO:0051033	RNA transmembrane transporter activity	molecular_function	7	Hnrnpa3	1	451	1	4090	0.110269
GO:2000751	histone H3-T3 phosphorylation involved in chromosome passenger complex localization to kinetochore	biological_process	13	Haspin	1	451	1	4090	0.110269
GO:0051373	FATZ binding	molecular_function	6	Tcap	1	451	1	4090	0.110269
GO:0034970	histone H3-R2 methylation	biological_process	13	Carm1	1	451	1	4090	0.110269
GO:0040017	positive regulation of locomotion	biological_process	6	Bves	1	451	1	4090	0.110269
GO:1904139	regulation of microglial cell migration	biological_process	11	P2ry12	1	451	1	4090	0.110269
GO:0070543	response to linoleic acid	biological_process	7	Adipoq	1	451	1	4090	0.110269
GO:0006304	DNA modification	biological_process	8	Trex1	1	451	1	4090	0.110269
GO:0019852	L-ascorbic acid metabolic process	biological_process	7	Gclc	1	451	1	4090	0.110269
GO:0070994	detection of oxidative stress	biological_process	6	Adipoq	1	451	1	4090	0.110269
GO:0002637	regulation of immunoglobulin production	biological_process	8	Trex1	1	451	1	4090	0.110269
GO:0045163	clustering of voltage-gated potassium channels	biological_process	7	Akap5	1	451	1	4090	0.110269
GO:0061886	negative regulation of mini excitatory postsynaptic potential	biological_process	10	Syne1	1	451	1	4090	0.110269
GO:0060973	cell migration involved in heart development	biological_process	7	Bves	1	451	1	4090	0.110269
GO:0021902	commitment of neuronal cell to specific neuron type in forebrain	biological_process	8	Bcl11b	1	451	1	4090	0.110269
GO:0002634	regulation of germinal center formation	biological_process	9	Mef2c	1	451	1	4090	0.110269
GO:0002379	immunoglobulin biosynthetic process involved in immune response	biological_process	8	Trex1	1	451	1	4090	0.110269
GO:0038001	paracrine signaling	biological_process	6	Pgr	1	451	1	4090	0.110269
GO:1902038	positive regulation of hematopoietic stem cell differentiation	biological_process	9	Foxc1	1	451	1	4090	0.110269
GO:0060478	acrosomal vesicle exocytosis	biological_process	10	Unc13b	1	451	1	4090	0.110269
GO:0042625	ATPase-coupled ion transmembrane transporter activity	molecular_function	6	Atp6v1f	1	451	1	4090	0.110269
GO:0001865	NK T cell differentiation	biological_process	10	Zbtb7b	1	451	1	4090	0.110269
GO:0035524	proline transmembrane transport	biological_process	12	Slc36a1	1	451	1	4090	0.110269
GO:1902990	mitotic telomere maintenance via semi-conservative replication	biological_process	10	Rtel1	1	451	1	4090	0.110269
GO:0033192	calmodulin-dependent protein phosphatase activity	molecular_function	11	Ppp3cb	1	451	1	4090	0.110269
GO:0006957	complement activation, alternative pathway	biological_process	6	C9	1	451	1	4090	0.110269
GO:1902219	negative regulation of intrinsic apoptotic signaling pathway in response to osmotic stress	biological_process	10	Ybx3	1	451	1	4090	0.110269
GO:0002305	CD8-positive, gamma-delta intraepithelial T cell differentiation	biological_process	11	Ccr9	1	451	1	4090	0.110269
GO:1904456	negative regulation of neuronal action potential	biological_process	7	Gpr35	1	451	1	4090	0.110269
GO:0031854	orexigenic neuropeptide QRFP receptor binding	molecular_function	8	Qrfp	1	451	1	4090	0.110269
GO:0072541	peroxynitrite reductase activity	molecular_function	5	Prdx5	1	451	1	4090	0.110269
GO:0015808	L-alanine transport	biological_process	12	Slc36a1	1	451	1	4090	0.110269
GO:0070287	ferritin receptor activity	molecular_function	4	Scara5	1	451	1	4090	0.110269
GO:0090136	epithelial cell-cell adhesion	biological_process	6	Bves	1	451	1	4090	0.110269
GO:0008379	thioredoxin peroxidase activity	molecular_function	5	Prdx5	1	451	1	4090	0.110269
GO:0061820	telomeric D-loop disassembly	biological_process	10	Rtel1	1	451	1	4090	0.110269
GO:0032423	regulation of mismatch repair	biological_process	10	Axin2	1	451	1	4090	0.110269
GO:0072421	detection of DNA damage stimulus involved in DNA damage checkpoint	biological_process	8	Trex1	1	451	1	4090	0.110269
GO:0060931	sinoatrial node cell development	biological_process	10	Bves	1	451	1	4090	0.110269
GO:0021722	superior olivary nucleus maturation	biological_process	6	Cdk5r1	1	451	1	4090	0.110269
GO:0002138	retinoic acid biosynthetic process	biological_process	11	Dhrs9	1	451	1	4090	0.110269
GO:0110032	positive regulation of G2/MI transition of meiotic cell cycle	biological_process	10	Cdc25a	1	451	1	4090	0.110269
GO:0035585	calcium-mediated signaling using extracellular calcium source	biological_process	8	P2ry12	1	451	1	4090	0.110269
GO:0045348	positive regulation of MHC class II biosynthetic process	biological_process	9	Cdk5r1	1	451	1	4090	0.110269
GO:0060421	positive regulation of heart growth	biological_process	9	Prox1	1	451	1	4090	0.110269
GO:0042509	regulation of tyrosine phosphorylation of STAT protein	biological_process	10	Cnot7	1	451	1	4090	0.110269
GO:0106016	positive regulation of inflammatory response to wounding	biological_process	10	Grn	1	451	1	4090	0.110269
GO:0030964	NADH dehydrogenase complex	cellular_component	5	mt-Nd3	1	451	1	4090	0.110269
GO:0060921	sinoatrial node cell differentiation	biological_process	9	Mesp1	1	451	1	4090	0.110269
GO:0097720	calcineurin-mediated signaling	biological_process	8	Ppp3cb	1	451	1	4090	0.110269
GO:0042008	interleukin-18 receptor activity	molecular_function	7	Il18r1	1	451	1	4090	0.110269
GO:0015193	L-proline transmembrane transporter activity	molecular_function	7	Slc36a1	1	451	1	4090	0.110269
GO:0042904	9-cis-retinoic acid biosynthetic process	biological_process	12	Dhrs9	1	451	1	4090	0.110269
GO:1905751	positive regulation of endosome to plasma membrane protein transport	biological_process	10	Akap5	1	451	1	4090	0.110269
GO:0007576	nucleolar fragmentation	biological_process	8	Zfp354a	1	451	1	4090	0.110269
GO:0036414	histone citrullination	biological_process	10	Padi4	1	451	1	4090	0.110269
GO:0043980	histone H2B-K12 acetylation	biological_process	12	Sphk2	1	451	1	4090	0.110269
GO:0070895	negative regulation of transposon integration	biological_process	8	Zfp457	1	451	1	4090	0.110269
GO:0035522	monoubiquitinated histone H2A deubiquitination	biological_process	12	Asxl1	1	451	1	4090	0.110269
GO:0098915	membrane repolarization during ventricular cardiac muscle cell action potential	biological_process	11	Kcne3	1	451	1	4090	0.110269
GO:0050672	negative regulation of lymphocyte proliferation	biological_process	10	Sox11	1	451	1	4090	0.110269
GO:0047023	androsterone dehydrogenase activity	molecular_function	7	Dhrs9	1	451	1	4090	0.110269
GO:0071171	site-specific DNA replication termination at RTS1 barrier	biological_process	10	Rtf2	1	451	1	4090	0.110269
GO:0006750	glutathione biosynthetic process	biological_process	9	Gclc	1	451	1	4090	0.110269
GO:1904317	cellular response to 2-O-acetyl-1-O-hexadecyl-sn-glycero-3-phosphocholine	biological_process	7	Ptafr	1	451	1	4090	0.110269
GO:0007210	serotonin receptor signaling pathway	biological_process	5	Htr2b	1	451	1	4090	0.110269
GO:0042799	histone methyltransferase activity (H4-K20 specific)	molecular_function	10	Kmt5b	1	451	1	4090	0.110269
GO:1905663	positive regulation of telomerase RNA reverse transcriptase activity	biological_process	9	Hnrnpd	1	451	1	4090	0.110269
GO:1901899	positive regulation of relaxation of cardiac muscle	biological_process	8	Hrc	1	451	1	4090	0.110269
GO:0019863	IgE binding	molecular_function	6	Fcer2a	1	451	1	4090	0.110269
GO:0003260	cardioblast migration	biological_process	9	Mesp1	1	451	1	4090	0.110269
GO:0001994	norepinephrine-epinephrine vasoconstriction involved in regulation of systemic arterial blood pressure	biological_process	11	Adra1a	1	451	1	4090	0.110269
GO:0030943	mitochondrion targeting sequence binding	molecular_function	7	Tomm40l	1	451	1	4090	0.110269
GO:0035242	protein-arginine omega-N asymmetric methyltransferase activity	molecular_function	9	Carm1	1	451	1	4090	0.110269
GO:0099011	neuronal dense core vesicle exocytosis	biological_process	11	Unc13b	1	451	1	4090	0.110269
GO:2001111	positive regulation of lens epithelial cell proliferation	biological_process	9	Sox11	1	451	1	4090	0.110269
GO:0046683	response to organophosphorus	biological_process	6	Ptafr	1	451	1	4090	0.110269
GO:0060073	micturition	biological_process	6	Adra1a	1	451	1	4090	0.110269
GO:0046473	phosphatidic acid metabolic process	biological_process	9	Pla2g6	1	451	1	4090	0.110269
GO:1904316	response to 2-O-acetyl-1-O-hexadecyl-sn-glycero-3-phosphocholine	biological_process	7	Ptafr	1	451	1	4090	0.110269
GO:1990523	bone regeneration	biological_process	7	Postn	1	451	1	4090	0.110269
GO:0001216	DNA-binding transcription activator activity	molecular_function	5	E2f3	1	451	1	4090	0.110269
GO:0110077	vesicle-mediated intercellular transport	biological_process	7	Arc	1	451	1	4090	0.110269
GO:0032558	adenyl deoxyribonucleotide binding	molecular_function	8	Trex1	1	451	1	4090	0.110269
GO:0002934	desmosome organization	biological_process	7	Nectin1	1	451	1	4090	0.110269
GO:0150063	visual system development	biological_process	7	P2ry12	1	451	1	4090	0.110269
GO:0047044	androstan-3-alpha,17-beta-diol dehydrogenase activity	molecular_function	7	Dhrs9	1	451	1	4090	0.110269
GO:0031291	Ran protein signal transduction	biological_process	8	Gpsm2	1	451	1	4090	0.110269
GO:1902412	regulation of mitotic cytokinesis	biological_process	8	Incenp	1	451	1	4090	0.110269
GO:0036438	maintenance of lens transparency	biological_process	8	Foxc1	1	451	1	4090	0.110269
GO:0048739	cardiac muscle fiber development	biological_process	9	Tcap	1	451	1	4090	0.110269
GO:0004937	alpha1-adrenergic receptor activity	molecular_function	10	Adra1a	1	451	1	4090	0.110269
GO:2001016	positive regulation of skeletal muscle cell differentiation	biological_process	8	Mef2c	1	451	1	4090	0.110269
GO:2001169	regulation of ATP biosynthetic process	biological_process	11	Sphk2	1	451	1	4090	0.110269
GO:0045926	negative regulation of growth	biological_process	6	Ptk6	1	451	1	4090	0.110269
GO:0035717	chemokine (C-C motif) ligand 7 binding	molecular_function	8	Ccr2	1	451	1	4090	0.110269
GO:0016402	pristanoyl-CoA oxidase activity	molecular_function	8	Acox3	1	451	1	4090	0.110269
GO:0004723	calcium-dependent protein serine/threonine phosphatase activity	molecular_function	10	Ppp3cb	1	451	1	4090	0.110269
GO:0001875	lipopolysaccharide receptor activity	molecular_function	7	Ptafr	1	451	1	4090	0.110269
GO:0043271	negative regulation of ion transport	biological_process	8	Akap5	1	451	1	4090	0.110269
GO:1901346	negative regulation of vasculature development involved in avascular cornea development in camera-type eye	biological_process	8	Angptl7	1	451	1	4090	0.110269
GO:0044218	other organism cell membrane	cellular_component	5	C9	1	451	1	4090	0.110269
GO:0002528	regulation of vascular permeability involved in acute inflammatory response	biological_process	8	C2cd4a	1	451	1	4090	0.110269
GO:0003939	L-iditol 2-dehydrogenase activity	molecular_function	7	Sord	1	451	1	4090	0.110269
GO:0072394	detection of stimulus involved in cell cycle checkpoint	biological_process	7	Trex1	1	451	1	4090	0.110269
GO:0002282	microglial cell activation involved in immune response	biological_process	8	Grn	1	451	1	4090	0.110269
GO:0045039	protein insertion into mitochondrial inner membrane	biological_process	7	Timm13	1	451	1	4090	0.110269
GO:0033626	positive regulation of integrin activation by cell surface receptor linked signal transduction	biological_process	6	P2ry12	1	451	1	4090	0.110269
GO:0061333	renal tubule morphogenesis	biological_process	8	Mef2c	1	451	1	4090	0.110269
GO:0004839	ubiquitin activating enzyme activity	molecular_function	7	Uba1	1	451	1	4090	0.110269
GO:1903039	positive regulation of leukocyte cell-cell adhesion	biological_process	8	Ptafr	1	451	1	4090	0.110269
GO:0003236	sinus venosus morphogenesis	biological_process	6	Mesp1	1	451	1	4090	0.110269
GO:0010513	positive regulation of phosphatidylinositol biosynthetic process	biological_process	10	Htr2b	1	451	1	4090	0.110269
GO:0043376	regulation of CD8-positive, alpha-beta T cell differentiation	biological_process	11	Zbtb7b	1	451	1	4090	0.110269
GO:0009264	deoxyribonucleotide catabolic process	biological_process	10	Samhd1	1	451	1	4090	0.110269
GO:0033186	CAF-1 complex	cellular_component	4	Chaf1a	1	451	1	4090	0.110269
GO:0005055	laminin receptor activity	molecular_function	5	Rpsa	1	451	1	4090	0.110269
GO:2000659	regulation of interleukin-1-mediated signaling pathway	biological_process	9	Zbp1	1	451	1	4090	0.110269
GO:2000490	negative regulation of hepatic stellate cell activation	biological_process	8	Gclc	1	451	1	4090	0.110269
GO:0071678	olfactory bulb axon guidance	biological_process	7	Bcl11b	1	451	1	4090	0.110269
GO:1905025	negative regulation of membrane repolarization during ventricular cardiac muscle cell action potential	biological_process	8	Kcne3	1	451	1	4090	0.110269
GO:2000987	positive regulation of behavioral fear response	biological_process	9	Mef2c	1	451	1	4090	0.110269
GO:0090425	acinar cell differentiation	biological_process	9	Prox1	1	451	1	4090	0.110269
GO:1901877	negative regulation of calcium ion binding	biological_process	7	Pln	1	451	1	4090	0.110269
GO:0002246	wound healing involved in inflammatory response	biological_process	7	Ccr2	1	451	1	4090	0.110269
GO:0110025	DNA strand resection involved in replication fork processing	biological_process	8	Samhd1	1	451	1	4090	0.110269
GO:0045822	negative regulation of heart contraction	biological_process	9	Pln	1	451	1	4090	0.110269
GO:0034673	inhibin-betaglycan-ActRII complex	cellular_component	6	Inha	1	451	1	4090	0.110269
GO:0036310	annealing helicase activity	molecular_function	9	Recql	1	451	1	4090	0.110269
GO:0035517	PR-DUB complex	cellular_component	5	Asxl1	1	451	1	4090	0.110269
GO:0090068	positive regulation of cell cycle process	biological_process	8	Lef1	1	451	1	4090	0.110269
GO:0035642	histone methyltransferase activity (H3-R17 specific)	molecular_function	10	Carm1	1	451	1	4090	0.110269
GO:0006669	sphinganine-1-phosphate biosynthetic process	biological_process	9	Sphk2	1	451	1	4090	0.110269
GO:0044265	cellular macromolecule catabolic process	biological_process	7	Cln8	1	451	1	4090	0.110269
GO:0051896	regulation of protein kinase B signaling	biological_process	9	Rcn3	1	451	1	4090	0.110269
GO:1904506	negative regulation of telomere maintenance in response to DNA damage	biological_process	11	Rtel1	1	451	1	4090	0.110269
GO:0005368	taurine transmembrane transporter activity	molecular_function	7	Slc36a1	1	451	1	4090	0.110269
GO:1900625	positive regulation of monocyte aggregation	biological_process	9	Has2	1	451	1	4090	0.110269
GO:1901894	regulation of ATPase-coupled calcium transmembrane transporter activity	biological_process	9	Pln	1	451	1	4090	0.110269
GO:0042089	cytokine biosynthetic process	biological_process	7	Cebpe	1	451	1	4090	0.110269
GO:0003842	1-pyrroline-5-carboxylate dehydrogenase activity	molecular_function	7	Aldh4a1	1	451	1	4090	0.110269
GO:1901534	positive regulation of hematopoietic progenitor cell differentiation	biological_process	8	Foxc1	1	451	1	4090	0.110269
GO:0048534	hematopoietic or lymphoid organ development	biological_process	6	Asxl1	1	451	1	4090	0.110269
GO:1990393	3M complex	cellular_component	4	Obsl1	1	451	1	4090	0.110269
GO:1901660	calcium ion export	biological_process	11	Atp2b4	1	451	1	4090	0.110269
GO:0000768	syncytium formation by plasma membrane fusion	biological_process	5	Vash2	1	451	1	4090	0.110269
GO:0072160	nephron tubule epithelial cell differentiation	biological_process	8	Mef2c	1	451	1	4090	0.110269
GO:0030223	neutrophil differentiation	biological_process	9	Lef1	1	451	1	4090	0.110269
GO:0050251	retinol isomerase activity	molecular_function	6	Degs1	1	451	1	4090	0.110269
GO:0061769	ribosylnicotinate kinase activity	molecular_function	7	Nmrk2	1	451	1	4090	0.110269
GO:0016320	endoplasmic reticulum membrane fusion	biological_process	8	Vcpip1	1	451	1	4090	0.110269
GO:2000640	positive regulation of SREBP signaling pathway	biological_process	9	Zbtb7b	1	451	1	4090	0.110269
GO:2000534	positive regulation of renal albumin absorption	biological_process	7	Adipoq	1	451	1	4090	0.110269
GO:1904586	cellular response to putrescine	biological_process	8	Hnrnpd	1	451	1	4090	0.110269
GO:0005139	interleukin-7 receptor binding	molecular_function	7	Il7	1	451	1	4090	0.110269
GO:2000590	negative regulation of metanephric mesenchymal cell migration	biological_process	9	Adipoq	1	451	1	4090	0.110269
GO:0006062	sorbitol catabolic process	biological_process	10	Sord	1	451	1	4090	0.110269
GO:0004146	dihydrofolate reductase activity	molecular_function	7	Dhfr	1	451	1	4090	0.110269
GO:0060259	regulation of feeding behavior	biological_process	6	Qrfp	1	451	1	4090	0.110269
GO:0032616	interleukin-13 production	biological_process	5	Sphk2	1	451	1	4090	0.110269
GO:0090534	calcium ion-transporting ATPase complex	cellular_component	8	Pln	1	451	1	4090	0.110269
GO:0047613	aconitate decarboxylase activity	molecular_function	7	Acod1	1	451	1	4090	0.110269
GO:0060266	negative regulation of respiratory burst involved in inflammatory response	biological_process	8	Grn	1	451	1	4090	0.110269
GO:0043624	cellular protein complex disassembly	biological_process	7	Akap5	1	451	1	4090	0.110269
GO:1903818	positive regulation of voltage-gated potassium channel activity	biological_process	9	Lrrc55	1	451	1	4090	0.110269
GO:0015858	nucleoside transport	biological_process	8	Slc29a3	1	451	1	4090	0.110269
GO:1903997	positive regulation of non-membrane spanning protein tyrosine kinase activity	biological_process	13	Adra1a	1	451	1	4090	0.110269
GO:0000801	central element	cellular_component	7	Incenp	1	451	1	4090	0.110269
GO:0061756	leukocyte adhesion to vascular endothelial cell	biological_process	7	Ccr2	1	451	1	4090	0.110269
GO:0004668	protein-arginine deiminase activity	molecular_function	7	Padi4	1	451	1	4090	0.110269
GO:0042036	negative regulation of cytokine biosynthetic process	biological_process	8	Rnf128	1	451	1	4090	0.110269
GO:1904161	DNA synthesis involved in UV-damage excision repair	biological_process	10	Trex1	1	451	1	4090	0.110269
GO:0097657	3',5'-nucleotide bisphosphate phosphatase activity	molecular_function	8	Impad1	1	451	1	4090	0.110269
GO:0003987	acetate-CoA ligase activity	molecular_function	7	Acss3	1	451	1	4090	0.110269
GO:0022858	alanine transmembrane transporter activity	molecular_function	7	Slc36a1	1	451	1	4090	0.110269
GO:1902257	negative regulation of apoptotic process involved in outflow tract morphogenesis	biological_process	8	Foxc1	1	451	1	4090	0.110269
GO:0007567	parturition	biological_process	5	Ptafr	1	451	1	4090	0.110269
GO:0000733	DNA strand renaturation	biological_process	8	Recql	1	451	1	4090	0.110269
GO:1904430	negative regulation of t-circle formation	biological_process	11	Rtel1	1	451	1	4090	0.110269
GO:0050218	propionate-CoA ligase activity	molecular_function	7	Acss3	1	451	1	4090	0.110269
GO:0071258	cellular response to gravity	biological_process	6	Ptafr	1	451	1	4090	0.110269
GO:0009435	NAD biosynthetic process	biological_process	10	Nmrk2	1	451	1	4090	0.110269
GO:0042271	susceptibility to natural killer cell mediated cytotoxicity	biological_process	9	Ulbp1	1	451	1	4090	0.110269
GO:0043279	response to alkaloid	biological_process	7	Srsf9	1	451	1	4090	0.110269
GO:0016702	oxidoreductase activity, acting on single donors with incorporation of molecular oxygen, incorporation of two atoms of oxygen	molecular_function	6	P4ha3	1	451	1	4090	0.110269
GO:0048203	vesicle targeting, trans-Golgi to endosome	biological_process	6	Wipi1	1	451	1	4090	0.110269
GO:0003997	acyl-CoA oxidase activity	molecular_function	7	Acox3	1	451	1	4090	0.110269
GO:2000412	positive regulation of thymocyte migration	biological_process	10	Ccr2	1	451	1	4090	0.110269
GO:0033540	fatty acid beta-oxidation using acyl-CoA oxidase	biological_process	12	Acox3	1	451	1	4090	0.110269
GO:0015990	electron transport coupled proton transport	biological_process	11	mt-Nd4	1	451	1	4090	0.110269
GO:1902282	voltage-gated potassium channel activity involved in ventricular cardiac muscle cell action potential repolarization	molecular_function	11	Kcne3	1	451	1	4090	0.110269
GO:0035716	chemokine (C-C motif) ligand 12 binding	molecular_function	8	Ccr2	1	451	1	4090	0.110269
GO:0031440	regulation of mRNA 3'-end processing	biological_process	9	Papola	1	451	1	4090	0.110269
GO:0045923	positive regulation of fatty acid metabolic process	biological_process	9	Adipoq	1	451	1	4090	0.110269
GO:0051415	microtubule nucleation by interphase microtubule organizing center	biological_process	10	Tubgcp6	1	451	1	4090	0.110269
GO:1903334	positive regulation of protein folding	biological_process	7	Grn	1	451	1	4090	0.110269
GO:0000923	equatorial microtubule organizing center	cellular_component	7	Tubgcp6	1	451	1	4090	0.110269
GO:0048694	positive regulation of collateral sprouting of injured axon	biological_process	9	Lrp1	1	451	1	4090	0.110269
GO:1900015	regulation of cytokine production involved in inflammatory response	biological_process	7	Pld4	1	451	1	4090	0.110269
GO:0097281	immune complex formation	biological_process	9	Trex1	1	451	1	4090	0.110269
GO:0099104	potassium channel activator activity	molecular_function	7	Lrrc55	1	451	1	4090	0.110269
GO:2000556	positive regulation of T-helper 1 cell cytokine production	biological_process	12	Il18r1	1	451	1	4090	0.110269
GO:0035662	Toll-like receptor 4 binding	molecular_function	7	Saa3	1	451	1	4090	0.110269
GO:0036394	amylase secretion	biological_process	11	Akap5	1	451	1	4090	0.110269
GO:0001621	ADP receptor activity	molecular_function	9	P2ry12	1	451	1	4090	0.110269
GO:0043977	histone H2A-K5 acetylation	biological_process	12	Sphk2	1	451	1	4090	0.110269
GO:0072573	tolerance induction to lipopolysaccharide	biological_process	5	Acod1	1	451	1	4090	0.110269
GO:0002159	desmosome assembly	biological_process	8	Prkca	1	451	1	4090	0.110269
GO:1904709	negative regulation of granulosa cell apoptotic process	biological_process	11	Pgr	1	451	1	4090	0.110269
GO:0046370	fructose biosynthetic process	biological_process	9	Sord	1	451	1	4090	0.110269
GO:0051870	methotrexate binding	molecular_function	5	Dhfr	1	451	1	4090	0.110269
GO:0035705	T-helper 17 cell chemotaxis	biological_process	9	Ccr2	1	451	1	4090	0.110269
GO:0031323	regulation of cellular metabolic process	biological_process	6	Trex1	1	451	1	4090	0.110269
GO:0072102	glomerulus morphogenesis	biological_process	5	Mef2c	1	451	1	4090	0.110269
GO:0051141	negative regulation of NK T cell proliferation	biological_process	13	Zbtb7b	1	451	1	4090	0.110269
GO:0043512	inhibin A complex	cellular_component	5	Inha	1	451	1	4090	0.110269
GO:1905931	negative regulation of vascular smooth muscle cell differentiation involved in phenotypic switching	biological_process	11	Fgf9	1	451	1	4090	0.110269
GO:0097069	cellular response to thyroxine stimulus	biological_process	7	Gclc	1	451	1	4090	0.110269
GO:0008832	dGTPase activity	molecular_function	8	Samhd1	1	451	1	4090	0.110269
GO:0004096	catalase activity	molecular_function	5	Rp1	1	451	1	4090	0.110269
GO:0051967	negative regulation of synaptic transmission, glutamatergic	biological_process	9	Pla2g6	1	451	1	4090	0.110269
GO:0051648	vesicle localization	biological_process	6	Myo1a	1	451	1	4090	0.110269
GO:0044753	amphisome	cellular_component	8	Sqstm1	1	451	1	4090	0.110269
GO:1903817	negative regulation of voltage-gated potassium channel activity	biological_process	9	Kcne3	1	451	1	4090	0.110269
GO:0099526	presynapse to nucleus signaling pathway	biological_process	6	Pclo	1	451	1	4090	0.110269
GO:0006123	mitochondrial electron transport, cytochrome c to oxygen	biological_process	10	Cycs	1	451	1	4090	0.110269
GO:1904358	positive regulation of telomere maintenance via telomere lengthening	biological_process	11	Rtel1	1	451	1	4090	0.110269
GO:1902564	negative regulation of neutrophil activation	biological_process	8	Grn	1	451	1	4090	0.110269
GO:0005342	organic acid transmembrane transporter activity	molecular_function	5	Slc29a4	1	451	1	4090	0.110269
GO:0047522	15-oxoprostaglandin 13-oxidase activity	molecular_function	7	Zadh2	1	451	1	4090	0.110269
GO:0019919	peptidyl-arginine methylation, to asymmetrical-dimethyl arginine	biological_process	14	Carm1	1	451	1	4090	0.110269
GO:0007260	tyrosine phosphorylation of STAT protein	biological_process	11	Ptk6	1	451	1	4090	0.110269
GO:0008441	3'(2'),5'-bisphosphate nucleotidase activity	molecular_function	9	Impad1	1	451	1	4090	0.110269
GO:0098837	postsynaptic recycling endosome	cellular_component	9	Akap5	1	451	1	4090	0.110269
GO:0030241	skeletal muscle myosin thick filament assembly	biological_process	8	Tcap	1	451	1	4090	0.110269
GO:0051378	serotonin binding	molecular_function	5	Htr2b	1	451	1	4090	0.110269
GO:0035715	chemokine (C-C motif) ligand 2 binding	molecular_function	8	Ccr2	1	451	1	4090	0.110269
GO:1902093	positive regulation of flagellated sperm motility	biological_process	8	Cfap69	1	451	1	4090	0.110269
GO:0004656	procollagen-proline 4-dioxygenase activity	molecular_function	9	P4ha3	1	451	1	4090	0.110269
GO:1903659	regulation of complement-dependent cytotoxicity	biological_process	6	Cr1l	1	451	1	4090	0.110269
GO:2000451	positive regulation of CD8-positive, alpha-beta T cell extravasation	biological_process	10	Ccr2	1	451	1	4090	0.110269
GO:0046883	regulation of hormone secretion	biological_process	7	Scg5	1	451	1	4090	0.110269
GO:2000464	positive regulation of astrocyte chemotaxis	biological_process	9	Ccr2	1	451	1	4090	0.110269
GO:0050692	DBD domain binding	molecular_function	6	Prox1	1	451	1	4090	0.110269
GO:0000415	negative regulation of histone H3-K36 methylation	biological_process	12	Bcor	1	451	1	4090	0.110269
GO:2000866	positive regulation of estradiol secretion	biological_process	9	Spp1	1	451	1	4090	0.110269
GO:0001566	non-kinase phorbol ester receptor activity	molecular_function	6	Unc13b	1	451	1	4090	0.110269
GO:2000478	positive regulation of metanephric glomerular visceral epithelial cell development	biological_process	9	Adipoq	1	451	1	4090	0.110269
GO:1904109	positive regulation of cholesterol import	biological_process	11	Lrp1	1	451	1	4090	0.110269
GO:0043045	DNA methylation involved in embryo development	biological_process	11	Zfp57	1	451	1	4090	0.110269
GO:0090657	telomeric loop disassembly	biological_process	9	Rtel1	1	451	1	4090	0.110269
GO:0071899	negative regulation of estrogen receptor binding	biological_process	6	Lef1	1	451	1	4090	0.110269
GO:0043027	cysteine-type endopeptidase inhibitor activity involved in apoptotic process	molecular_function	9	Naip2;Lef1;Prdx5	3	451	11	4090	0.112397
GO:0007565	female pregnancy	biological_process	5	Cr1l;Sphk2;Cldn4	3	451	11	4090	0.112397
GO:0006259	DNA metabolic process	biological_process	7	Pld4;Trex1;Trex2	3	451	11	4090	0.112397
GO:0010862	positive regulation of pathway-restricted SMAD protein phosphorylation	biological_process	11	Gdf11;Inha;Gdf5	3	451	11	4090	0.112397
GO:0030326	embryonic limb morphogenesis	biological_process	7	Lef1;Gdf5;Fgf9	3	451	11	4090	0.112397
GO:0035774	positive regulation of insulin secretion involved in cellular response to glucose stimulus	biological_process	12	Lrp1;Ppp3cb;Pla2g6	3	451	11	4090	0.112397
GO:0007268	chemical synaptic transmission	biological_process	9	Hrh1;Htr2b;Unc13b;Syt10;Mycbpap	5	451	24	4090	0.116755
GO:0006874	cellular calcium ion homeostasis	biological_process	11	Ccr2;Pln;Atp2b4;Trdn;Htr2b	5	451	24	4090	0.116755
GO:0007507	heart development	biological_process	6	Ppp3cb;Bves;Htr2b;Mef2c;Shc1;Bcor;Rbm20;Gm49333;Cplane1;Xirp2;Sall1;Foxc1	12	451	75	4090	0.117515
GO:0007030	Golgi organization	biological_process	6	Atp8b1;Rab43;Vcpip1;Syne1;Dnajc28;Obsl1;Bhlha15	7	451	38	4090	0.118082
GO:0016491	oxidoreductase activity	molecular_function	4	Acox3;P4ha3;Degs1;mt-Nd3;Hsd3b7;Prdx5;Sord;Mical3;Prodh;Aldh4a1;Dhfr;Zadh2;Alkbh7;Cyba;mt-Nd4;Rrm2;Dhrs9	17	451	114	4090	0.118971
GO:0042475	odontogenesis of dentin-containing tooth	biological_process	7	Tnc;Foxc1;Lef1;Bcl11b	4	451	18	4090	0.128582
GO:0009725	response to hormone	biological_process	5	Adra1a;Gclc;Sord;mt-Nd3	4	451	18	4090	0.128582
GO:0007283	spermatogenesis	biological_process	7	Mycbpap;Dbil5;Ggn;Txndc8;Ybx3;Ccdc87;Syne1;Atp2b4;Cfap69;Rad18;Tssk1	11	451	69	4090	0.1327
GO:0007095	mitotic G2 DNA damage checkpoint	biological_process	9	Clspn;Taok3	2	451	6	4090	0.134914
GO:0005782	peroxisomal matrix	cellular_component	8	Acox3;Prdx5	2	451	6	4090	0.134914
GO:0008408	3'-5' exonuclease activity	molecular_function	8	Trex2;Trex1	2	451	6	4090	0.134914
GO:2000179	positive regulation of neural precursor cell proliferation	biological_process	8	Prox1;Rassf10	2	451	6	4090	0.134914
GO:0051225	spindle assembly	biological_process	9	Stard9;Tubgcp6	2	451	6	4090	0.134914
GO:0032270	positive regulation of cellular protein metabolic process	biological_process	8	Uhrf1;Adipoq	2	451	6	4090	0.134914
GO:0045332	phospholipid translocation	biological_process	9	Atp8b1;Kcnn4	2	451	6	4090	0.134914
GO:0030742	GTP-dependent protein binding	molecular_function	5	Rapgef6;Unc13b	2	451	6	4090	0.134914
GO:0030488	tRNA methylation	biological_process	11	Trdmt1;Tarbp1	2	451	6	4090	0.134914
GO:0010524	positive regulation of calcium ion transport into cytosol	biological_process	14	Akap5;Ffar1	2	451	6	4090	0.134914
GO:0004181	metallocarboxypeptidase activity	molecular_function	9	Vash2;Cpz	2	451	6	4090	0.134914
GO:0097542	ciliary tip	cellular_component	5	Armc9;Rp1	2	451	6	4090	0.134914
GO:1904355	positive regulation of telomere capping	biological_process	11	Rtel1;Hnrnpd	2	451	6	4090	0.134914
GO:0070527	platelet aggregation	biological_process	7	Gp1ba;P2ry12	2	451	6	4090	0.134914
GO:0006635	fatty acid beta-oxidation	biological_process	11	Acox3;Adipoq	2	451	6	4090	0.134914
GO:0043277	apoptotic cell clearance	biological_process	8	Ccr2;Trex1	2	451	6	4090	0.134914
GO:0017157	regulation of exocytosis	biological_process	7	Pclo;Nsf	2	451	6	4090	0.134914
GO:0050678	regulation of epithelial cell proliferation	biological_process	7	Uhrf1;Pgr	2	451	6	4090	0.134914
GO:0060213	positive regulation of nuclear-transcribed mRNA poly(A) tail shortening	biological_process	11	Cnot1;Cnot7	2	451	6	4090	0.134914
GO:0097225	sperm midpiece	cellular_component	5	Cfap69;Sqstm1	2	451	6	4090	0.134914
GO:0048598	embryonic morphogenesis	biological_process	5	Msx3;Htr2b	2	451	6	4090	0.134914
GO:0000940	condensed chromosome outer kinetochore	cellular_component	4	Cenpf;Ska2	2	451	6	4090	0.134914
GO:0042476	odontogenesis	biological_process	6	Bcor;Axin2	2	451	6	4090	0.134914
GO:0008016	regulation of heart contraction	biological_process	8	Hrc;Pln	2	451	6	4090	0.134914
GO:0001945	lymph vessel development	biological_process	5	Foxc1;Prox1	2	451	6	4090	0.134914
GO:0010460	positive regulation of heart rate	biological_process	10	Hrc;Adra1a	2	451	6	4090	0.134914
GO:0045088	regulation of innate immune response	biological_process	7	Samhd1;Trex1	2	451	6	4090	0.134914
GO:0097755	positive regulation of blood vessel diameter	biological_process	9	Pla2g6;Ptafr	2	451	6	4090	0.134914
GO:0001736	establishment of planar polarity	biological_process	6	Cplane1;Alms1	2	451	6	4090	0.134914
GO:0008076	voltage-gated potassium channel complex	cellular_component	9	Lrrc55;Kcne3;Kcng1	3	451	12	4090	0.138152
GO:0071949	FAD binding	molecular_function	7	Acox3;Mical3;Prodh	3	451	12	4090	0.138152
GO:0043122	regulation of I-kappaB kinase/NF-kappaB signaling	biological_process	9	Sphk2;Wdr83;Sqstm1	3	451	12	4090	0.138152
GO:0033017	sarcoplasmic reticulum membrane	cellular_component	6	Hrc;Pln;Trdn	3	451	12	4090	0.138152
GO:0035255	ionotropic glutamate receptor binding	molecular_function	7	Nsf;Cdk5r1;Sqstm1	3	451	12	4090	0.138152
GO:0002218	activation of innate immune response	biological_process	5	Ifi213;Ifi202b;Zbp1	3	451	12	4090	0.138152
GO:0001958	endochondral ossification	biological_process	6	Impad1;Mef2c;Foxc1	3	451	12	4090	0.138152
GO:0005759	mitochondrial matrix	cellular_component	7	Mthfs;Nars2;Alkbh7;Acss3;Shc1;Rpusd3;Prodh;Aldh4a1;Tsfm	9	451	55	4090	0.145819
GO:0005615	extracellular space	cellular_component	4	C9;Fgf9;Postn;Ulbp1;Cxcl16;Arsg;Gdf5;Serpina1b;Angptl7;Gdf11;Saa3;Wfdc17;Cpz;Prss23;F10;Serpina10;Gm11127;Lrrn3;Il7;Gp1ba;Pla2g6;Omd;Dpysl3;Grn;Irak4;C6;Spp1;Dkk2;Adipoq;Inha	30	451	224	4090	0.146503
GO:0055114	oxidation-reduction process	biological_process	4	Rrm2;Rp1;Prodh;Prdx5;Degs1;Alkbh7;Sord;Cyba;mt-Nd3;P4ha3;Zadh2;Hsd3b7;mt-Nd4;Acox3;Mical3;Cycs;Dhrs9;Dhfr;Aldh4a1	19	451	134	4090	0.148407
GO:0016779	nucleotidyltransferase activity	molecular_function	6	Papola;Papolb;Yrdc;Oasl2	4	451	19	4090	0.149485
GO:0001756	somitogenesis	biological_process	7	Axin2;Tcap;Lef1;Foxc1	4	451	19	4090	0.149485
GO:0000932	P-body	cellular_component	8	Cnot7;Sqstm1;Cnot1;Aicda;Syne1	5	451	26	4090	0.151205
GO:0005930	axoneme	cellular_component	6	Tubb4a;Spef1l;Rp1;Cenpf;Ambra1	5	451	26	4090	0.151205
GO:0030018	Z disc	cellular_component	5	Ppp3cb;3425401B19Rik;Adra1a;Tcap;Atp2b4;Hrc;Xirp2	7	451	41	4090	0.159069
GO:0050769	positive regulation of neurogenesis	biological_process	9	Sox11;Rassf10;Zfp335	3	451	13	4090	0.165664
GO:0000786	nucleosome	cellular_component	5	Sphk2;H3c8;H3c11	3	451	13	4090	0.165664
GO:0042733	embryonic digit morphogenesis	biological_process	6	Cplane1;Impad1;Sall1	3	451	13	4090	0.165664
GO:0030276	clathrin binding	molecular_function	5	Syt10;Syt9;Syt13	3	451	13	4090	0.165664
GO:0004867	serine-type endopeptidase inhibitor activity	molecular_function	8	Serpina1b;Serpina10;Wfdc17	3	451	13	4090	0.165664
GO:0060412	ventricular septum morphogenesis	biological_process	6	Sox11;Fzd2;Prox1	3	451	13	4090	0.165664
GO:0005802	trans-Golgi network	cellular_component	7	Grn;Gm49333;Stx16;Ccdc91;Plekhj1;Wipi1;Pclo;Postn;Atp8b1	9	451	57	4090	0.170476
GO:0042734	presynaptic membrane	cellular_component	5	Snph;Unc13b;Nectin1;Stx19	4	451	20	4090	0.171583
GO:0001649	osteoblast differentiation	biological_process	6	Lef1;Fgf9;Mef2c;Spp1	4	451	20	4090	0.171583
GO:0051865	protein autoubiquitination	biological_process	12	Trim17;Uhrf1;Rad18;Rnf133	4	451	20	4090	0.171583
GO:0032869	cellular response to insulin stimulus	biological_process	8	Lpin3;Adipoq;Hdac9;Gclc	4	451	20	4090	0.171583
GO:0002931	response to ischemia	biological_process	5	Sqstm1;Bves;Panx2;Mef2c	4	451	20	4090	0.171583
GO:0050727	regulation of inflammatory response	biological_process	8	Zbp1;Ccr2;Trex1;Grn	4	451	20	4090	0.171583
GO:0006887	exocytosis	biological_process	7	Stx19;Syt10;Mical3;Unc13b	4	451	20	4090	0.171583
GO:0043524	negative regulation of neuron apoptotic process	biological_process	10	Ambra1;Grn;Gdf5;Foxq1;Mef2c;Lrp1;Gclc	7	451	42	4090	0.174007
GO:0005576	extracellular region	cellular_component	3	Fgfbp3;Vash2;Gdf5;Ngrn;Serpina1b;Htra3;Prrg4;Scg5;Dkk2;Wfdc17;St6gal1;C9;Adipoq;Qrfp;Tnc;Angptl7;Gdf11;Il7;Saa3;C6;Spp1;Cpz;Grn;Jhy;F10;Prss23;Fndc5;Omd;Vcan;Serpina10;Fgf9;Postn;Inha	33	451	254	4090	0.175439
GO:1904706	negative regulation of vascular smooth muscle cell proliferation	biological_process	9	Adipoq;Mef2c	2	451	7	4090	0.175598
GO:1904754	positive regulation of vascular associated smooth muscle cell migration	biological_process	10	Lrp1;Fgf9	2	451	7	4090	0.175598
GO:0090503	RNA phosphodiester bond hydrolysis, exonucleolytic	biological_process	10	Cnot7;Cnot1	2	451	7	4090	0.175598
GO:0043537	negative regulation of blood vessel endothelial cell migration	biological_process	11	Atp2b4;Mef2c	2	451	7	4090	0.175598
GO:0001819	positive regulation of cytokine production	biological_process	7	Ccdc88b;Htr2b	2	451	7	4090	0.175598
GO:0046785	microtubule polymerization	biological_process	9	Rp1;Tppp	2	451	7	4090	0.175598
GO:0016045	detection of bacterium	biological_process	8	Naip2;Nod1	2	451	7	4090	0.175598
GO:0008569	ATP-dependent microtubule motor activity, minus-end-directed	molecular_function	12	Dnhd1;Kifc1	2	451	7	4090	0.175598
GO:0033116	endoplasmic reticulum-Golgi intermediate compartment membrane	cellular_component	6	Prrg4;Cln8	2	451	7	4090	0.175598
GO:0032007	negative regulation of TOR signaling	biological_process	10	Tnfaip8l1;Akt1s1	2	451	7	4090	0.175598
GO:0043008	ATP-dependent protein binding	molecular_function	5	Nsf;Pla2g6	2	451	7	4090	0.175598
GO:0030658	transport vesicle membrane	cellular_component	7	Syt10;Gm49333	2	451	7	4090	0.175598
GO:0045737	positive regulation of cyclin-dependent protein serine/threonine kinase activity	biological_process	13	Prox1;Cdk5r1	2	451	7	4090	0.175598
GO:0001835	blastocyst hatching	biological_process	6	Grn;Bcor	2	451	7	4090	0.175598
GO:0099149	regulation of postsynaptic neurotransmitter receptor internalization	biological_process	8	Syne1;Akap5	2	451	7	4090	0.175598
GO:0046628	positive regulation of insulin receptor signaling pathway	biological_process	9	Gkap1;Zbtb7b	2	451	7	4090	0.175598
GO:0045070	positive regulation of viral genome replication	biological_process	10	Cnot7;Ppih	2	451	7	4090	0.175598
GO:0051393	alpha-actinin binding	molecular_function	7	Xirp2;Alms1	2	451	7	4090	0.175598
GO:0061436	establishment of skin barrier	biological_process	10	Cldn4;Stmn1	2	451	7	4090	0.175598
GO:0032743	positive regulation of interleukin-2 production	biological_process	8	Ccr2;Runx1	2	451	7	4090	0.175598
GO:0032588	trans-Golgi network membrane	cellular_component	8	Impad1;Pld4	2	451	7	4090	0.175598
GO:0036126	sperm flagellum	cellular_component	5	Txndc8;Atp2b4	2	451	7	4090	0.175598
GO:0043523	regulation of neuron apoptotic process	biological_process	9	Akt1s1;Mef2c	2	451	7	4090	0.175598
GO:0005540	hyaluronic acid binding	molecular_function	6	Vcan;Lyve1	2	451	7	4090	0.175598
GO:0009897	external side of plasma membrane	cellular_component	5	Siglece;P2ry12;Cd8a;Cd5;Scara5;Alcam;Ccr9;Cr1l;Ccr2;Fcer2a;Gm11127;Ulbp1	12	451	81	4090	0.176433
GO:0042826	histone deacetylase binding	molecular_function	6	Bcor;Zbtb7b;Hdac9;Hnrnpd;Mef2c;Lef1	6	451	35	4090	0.182008
GO:0004518	nuclease activity	molecular_function	6	Pld4;Ear1;Trex1;Slfn14;Cnot7;Trex2	6	451	35	4090	0.182008
GO:0007219	Notch signaling pathway	biological_process	6	Mesp1;Akt1s1;Pln;Psen2;Foxc1;Maml1	6	451	35	4090	0.182008
GO:0016020	membrane	cellular_component	3	Calhm6;Mycbpap;Stx16;Pcdhga11;Arxes1;Ccr2;Pigyl;Dapp1;Tomm40l;Slc29a4;Il18r1;Atp8b1;Lrrc55;Mthfs;Siglece;Tmem233;Lrp1;Clec4a2;Kcng1;Adra1a;Zdhhc23;Paqr9;P2ry12;Tmem268;Nectin1;Smim19;Cyba;Plch2;Evi2a;Snph;Cd5;Cd8a;Cldn4;Fzd2;Psen2;Hrh1;Ptk6;Cplane1;Paqr7;Pigl;Htr2b;Pilra;Slc36a1;Stmn1;Alpk2;Unc13b;Zfp457;Has2;Arhgap45;Pcdha11;Fndc5;C9;Ccdc91;Yrdc;Syt9;Cln8;Galnt5;Atp2b4;Ddost;Sphk2;Gpsm2;Sectm1b;…	176	451	1514	4090	0.188078
GO:0005516	calmodulin binding	molecular_function	5	Akap5;Atp2b4;Kcnn4;Myo1a;Ppp3cb;Unc13b;Pla2g6	7	451	43	4090	0.189522
GO:0003676	nucleic acid binding	molecular_function	5	Zfp473;Gm5141;Zfp872;Zfp354a;Gpank1;Zfp947;Hnrnpd;Zfp984;Ybx3;Pabpc4l;Cnot7;Hnrnpa3;Zfp719;Zfp960;2210418O10Rik;Ear1;Sf3a3;Zfp711;Zfp629;Zfp385b;Bcl11b;Rbm20;Zfp449;Zbtb7b;Rtel1;Zfp72;Zfp335;Zfp457;D130040H23Rik;Zfp523;Zfp27;Sall1;Zfp819;Srsf9;Trex2;Neil2;Zfp758;Zfhx4;Zfp689;Zfp831;Nars2;Zfp469;BC025920;Recql;Zfp57;Ddx50;Trex1;Samhd1	48	451	385	4090	0.192825
GO:0001974	blood vessel remodeling	biological_process	5	Foxc1;Ccr2;Mef2c	3	451	14	4090	0.194604
GO:0030414	peptidase inhibitor activity	molecular_function	6	Serpina1b;Serpina10;Wfdc17	3	451	14	4090	0.194604
GO:0010466	negative regulation of peptidase activity	biological_process	10	Serpina1b;Serpina10;Wfdc17	3	451	14	4090	0.194604
GO:0030331	estrogen receptor binding	molecular_function	9	Cnot1;Lef1;Wipi1	3	451	14	4090	0.194604
GO:0030890	positive regulation of B cell proliferation	biological_process	11	Gpr183;Il7;Mef2c	3	451	14	4090	0.194604
GO:0071230	cellular response to amino acid stimulus	biological_process	7	Cyba;Hnrnpd;Lamtor4	3	451	14	4090	0.194604
GO:0007623	circadian rhythm	biological_process	4	Adipoq;Prokr1;Cldn4;Prox1	4	451	21	4090	0.194725
GO:0004252	serine-type endopeptidase activity	molecular_function	8	Prss23;Htra3;F10;Arxes1	4	451	21	4090	0.194725
GO:0001568	blood vessel development	biological_process	5	Sphk2;Foxc1;Mef2c;Trex1	4	451	21	4090	0.194725
GO:0030674	protein binding, bridging	molecular_function	5	Tcap;Tchh;Cntln;Trim17	4	451	21	4090	0.194725
GO:0007420	brain development	biological_process	6	Snph;Zfp335;Jhy;Gm49333;Foxc1;Prox1;Hnrnpd;Sphk2;Stmn1;Cdk5r1;Cttnbp2	11	451	75	4090	0.198922
GO:0030246	carbohydrate binding	molecular_function	4	Clec9a;Vcan;Siglece;Clec4a2;Nectin1;Fcer2a;Galnt5	7	451	44	4090	0.205575
GO:0061575	cyclin-dependent protein serine/threonine kinase activator activity	molecular_function	8	Cdk5r1	1	451	2	4090	0.208403
GO:0042773	ATP synthesis coupled electron transport	biological_process	8	mt-Nd4	1	451	2	4090	0.208403
GO:0035984	cellular response to trichostatin A	biological_process	8	Mef2c	1	451	2	4090	0.208403
GO:0033864	positive regulation of NAD(P)H oxidase activity	biological_process	8	Cyba	1	451	2	4090	0.208403
GO:0004982	N-formyl peptide receptor activity	molecular_function	7	Fpr1	1	451	2	4090	0.208403
GO:1903506	regulation of nucleic acid-templated transcription	biological_process	9	Nmi	1	451	2	4090	0.208403
GO:0060333	interferon-gamma-mediated signaling pathway	biological_process	7	Nmi	1	451	2	4090	0.208403
GO:0060052	neurofilament cytoskeleton organization	biological_process	8	Cln8	1	451	2	4090	0.208403
GO:0032816	positive regulation of natural killer cell activation	biological_process	9	Ulbp1	1	451	2	4090	0.208403
GO:1990743	protein sialylation	biological_process	9	St6gal1	1	451	2	4090	0.208403
GO:0071947	protein deubiquitination involved in ubiquitin-dependent protein catabolic process	biological_process	10	Usp9x	1	451	2	4090	0.208403
GO:0010642	negative regulation of platelet-derived growth factor receptor signaling pathway	biological_process	9	Adipoq	1	451	2	4090	0.208403
GO:0061386	closure of optic fissure	biological_process	8	Sox11	1	451	2	4090	0.208403
GO:2000467	positive regulation of glycogen (starch) synthase activity	biological_process	8	Adipoq	1	451	2	4090	0.208403
GO:1904047	S-adenosyl-L-methionine binding	molecular_function	5	Kmt5b	1	451	2	4090	0.208403
GO:0060297	regulation of sarcomere organization	biological_process	7	Mef2c	1	451	2	4090	0.208403
GO:0043370	regulation of CD4-positive, alpha-beta T cell differentiation	biological_process	11	Zbtb7b	1	451	2	4090	0.208403
GO:0140199	negative regulation of adenylate cyclase-activating adrenergic receptor signaling pathway involved in heart process	biological_process	7	Atp2b4	1	451	2	4090	0.208403
GO:0007223	Wnt signaling pathway, calcium modulating pathway	biological_process	9	Fzd2	1	451	2	4090	0.208403
GO:0043266	regulation of potassium ion transport	biological_process	9	Kcne3	1	451	2	4090	0.208403
GO:1900452	regulation of long-term synaptic depression	biological_process	10	Arc	1	451	2	4090	0.208403
GO:0035494	SNARE complex disassembly	biological_process	8	Nsf	1	451	2	4090	0.208403
GO:0032607	interferon-alpha production	biological_process	6	Trex1	1	451	2	4090	0.208403
GO:0048368	lateral mesoderm development	biological_process	7	Mesp1	1	451	2	4090	0.208403
GO:0002430	complement receptor mediated signaling pathway	biological_process	7	Fpr1	1	451	2	4090	0.208403
GO:0015269	calcium-activated potassium channel activity	molecular_function	9	Kcnn4	1	451	2	4090	0.208403
GO:0001957	intramembranous ossification	biological_process	6	Axin2	1	451	2	4090	0.208403
GO:0018216	peptidyl-arginine methylation	biological_process	11	Carm1	1	451	2	4090	0.208403
GO:1901726	negative regulation of histone deacetylase activity	biological_process	12	Sphk2	1	451	2	4090	0.208403
GO:0150094	amyloid-beta clearance by cellular catabolic process	biological_process	6	Lrp1	1	451	2	4090	0.208403
GO:0061084	negative regulation of protein refolding	biological_process	8	St13	1	451	2	4090	0.208403
GO:0060025	regulation of synaptic activity	biological_process	9	Mef2c	1	451	2	4090	0.208403
GO:0097581	lamellipodium organization	biological_process	7	Mtss2	1	451	2	4090	0.208403
GO:0032808	lacrimal gland development	biological_process	7	Foxc1	1	451	2	4090	0.208403
GO:0033262	regulation of nuclear cell cycle DNA replication	biological_process	8	Aicda	1	451	2	4090	0.208403
GO:0033146	regulation of intracellular estrogen receptor signaling pathway	biological_process	9	Carm1	1	451	2	4090	0.208403
GO:1990456	mitochondrion-endoplasmic reticulum membrane tethering	biological_process	5	Psen2	1	451	2	4090	0.208403
GO:1902083	negative regulation of peptidyl-cysteine S-nitrosylation	biological_process	10	Atp2b4	1	451	2	4090	0.208403
GO:0010700	negative regulation of norepinephrine secretion	biological_process	10	P2ry12	1	451	2	4090	0.208403
GO:0046685	response to arsenic-containing substance	biological_process	5	Gclc	1	451	2	4090	0.208403
GO:0050922	negative regulation of chemotaxis	biological_process	8	St6gal1	1	451	2	4090	0.208403
GO:0060849	regulation of transcription involved in lymphatic endothelial cell fate commitment	biological_process	11	Prox1	1	451	2	4090	0.208403
GO:0097575	lateral cell cortex	cellular_component	9	Gpsm2	1	451	2	4090	0.208403
GO:0030204	chondroitin sulfate metabolic process	biological_process	6	Impad1	1	451	2	4090	0.208403
GO:0033135	regulation of peptidyl-serine phosphorylation	biological_process	10	Hrc	1	451	2	4090	0.208403
GO:0061642	chemoattraction of axon	biological_process	7	Lrp1	1	451	2	4090	0.208403
GO:0046338	phosphatidylethanolamine catabolic process	biological_process	10	Pla2g6	1	451	2	4090	0.208403
GO:0009263	deoxyribonucleotide biosynthetic process	biological_process	10	Rrm2	1	451	2	4090	0.208403
GO:1904798	positive regulation of core promoter binding	biological_process	9	Foxc1	1	451	2	4090	0.208403
GO:0097001	ceramide binding	molecular_function	5	Cln8	1	451	2	4090	0.208403
GO:0071517	maintenance of imprinting at mating-type locus	biological_process	8	Zfp57	1	451	2	4090	0.208403
GO:0004022	alcohol dehydrogenase (NAD) activity	molecular_function	7	Dhrs9	1	451	2	4090	0.208403
GO:0050911	detection of chemical stimulus involved in sensory perception of smell	biological_process	7	Olfr18	1	451	2	4090	0.208403
GO:0033204	ribonuclease P RNA binding	molecular_function	7	Rpp21	1	451	2	4090	0.208403
GO:0016338	calcium-independent cell-cell adhesion via plasma membrane cell-adhesion molecules	biological_process	7	Cldn4	1	451	2	4090	0.208403
GO:0032328	alanine transport	biological_process	8	Slc36a1	1	451	2	4090	0.208403
GO:0009396	folic acid-containing compound biosynthetic process	biological_process	7	Mthfs	1	451	2	4090	0.208403
GO:0050801	ion homeostasis	biological_process	7	Wnk2	1	451	2	4090	0.208403
GO:0019062	virion attachment to host cell	biological_process	6	Nectin1	1	451	2	4090	0.208403
GO:0042461	photoreceptor cell development	biological_process	7	Rp1	1	451	2	4090	0.208403
GO:0006421	asparaginyl-tRNA aminoacylation	biological_process	13	Nars2	1	451	2	4090	0.208403
GO:0086023	adenylate cyclase-activating adrenergic receptor signaling pathway involved in heart process	biological_process	10	Pln	1	451	2	4090	0.208403
GO:0070995	NADPH oxidation	biological_process	5	Prdx5	1	451	2	4090	0.208403
GO:0045652	regulation of megakaryocyte differentiation	biological_process	8	Mef2c	1	451	2	4090	0.208403
GO:0048703	embryonic viscerocranium morphogenesis	biological_process	6	Mef2c	1	451	2	4090	0.208403
GO:0071799	cellular response to prostaglandin D stimulus	biological_process	8	Tnc	1	451	2	4090	0.208403
GO:1900028	negative regulation of ruffle assembly	biological_process	10	Arhgap24	1	451	2	4090	0.208403
GO:0061351	neural precursor cell proliferation	biological_process	4	Grn	1	451	2	4090	0.208403
GO:0050434	positive regulation of viral transcription	biological_process	9	Mdfic	1	451	2	4090	0.208403
GO:0090082	positive regulation of heart induction by negative regulation of canonical Wnt signaling pathway	biological_process	11	Mesp1	1	451	2	4090	0.208403
GO:0016082	synaptic vesicle priming	biological_process	8	Unc13b	1	451	2	4090	0.208403
GO:0003334	keratinocyte development	biological_process	7	Bcl11b	1	451	2	4090	0.208403
GO:0004300	enoyl-CoA hydratase activity	molecular_function	7	Auh	1	451	2	4090	0.208403
GO:1901895	negative regulation of ATPase-coupled calcium transmembrane transporter activity	biological_process	9	Pln	1	451	2	4090	0.208403
GO:0060539	diaphragm development	biological_process	8	Msc	1	451	2	4090	0.208403
GO:0047035	testosterone dehydrogenase (NAD+) activity	molecular_function	7	Dhrs9	1	451	2	4090	0.208403
GO:0003357	noradrenergic neuron differentiation	biological_process	7	Sox11	1	451	2	4090	0.208403
GO:0046541	saliva secretion	biological_process	8	Kcnn4	1	451	2	4090	0.208403
GO:0051610	serotonin uptake	biological_process	8	Slc29a4	1	451	2	4090	0.208403
GO:0006968	cellular defense response	biological_process	6	Ccr2	1	451	2	4090	0.208403
GO:0035845	photoreceptor cell outer segment organization	biological_process	5	Rp1	1	451	2	4090	0.208403
GO:0006398	mRNA 3'-end processing by stem-loop binding and cleavage	biological_process	11	Zfp473	1	451	2	4090	0.208403
GO:0035965	cardiolipin acyl-chain remodeling	biological_process	11	Pla2g6	1	451	2	4090	0.208403
GO:0008175	tRNA methyltransferase activity	molecular_function	8	Trdmt1	1	451	2	4090	0.208403
GO:0071986	Ragulator complex	cellular_component	8	Lamtor4	1	451	2	4090	0.208403
GO:0032405	MutLalpha complex binding	molecular_function	6	Trex1	1	451	2	4090	0.208403
GO:0051272	positive regulation of cellular component movement	biological_process	7	Stmn1	1	451	2	4090	0.208403
GO:0005787	signal peptidase complex	cellular_component	7	Arxes1	1	451	2	4090	0.208403
GO:0050710	negative regulation of cytokine secretion	biological_process	8	Hdac9	1	451	2	4090	0.208403
GO:0015187	glycine transmembrane transporter activity	molecular_function	5	Slc36a1	1	451	2	4090	0.208403
GO:0032273	positive regulation of protein polymerization	biological_process	8	Tppp	1	451	2	4090	0.208403
GO:0033180	proton-transporting V-type ATPase, V1 domain	cellular_component	6	Atp6v1f	1	451	2	4090	0.208403
GO:0004748	ribonucleoside-diphosphate reductase activity, thioredoxin disulfide as acceptor	molecular_function	8	Rrm2	1	451	2	4090	0.208403
GO:0016188	synaptic vesicle maturation	biological_process	7	Unc13b	1	451	2	4090	0.208403
GO:0048680	positive regulation of axon regeneration	biological_process	8	Grn	1	451	2	4090	0.208403
GO:1902262	apoptotic process involved in blood vessel morphogenesis	biological_process	9	Lef1	1	451	2	4090	0.208403
GO:0016471	vacuolar proton-transporting V-type ATPase complex	cellular_component	7	Atp6v1f	1	451	2	4090	0.208403
GO:0023024	MHC class I protein complex binding	molecular_function	6	Cd8a	1	451	2	4090	0.208403
GO:0098693	regulation of synaptic vesicle cycle	biological_process	7	Cdk5r1	1	451	2	4090	0.208403
GO:0050909	sensory perception of taste	biological_process	8	Lef1	1	451	2	4090	0.208403
GO:0015695	organic cation transport	biological_process	8	Slc29a4	1	451	2	4090	0.208403
GO:0015288	porin activity	molecular_function	8	Tomm40l	1	451	2	4090	0.208403
GO:0000403	Y-form DNA binding	molecular_function	8	Rad18	1	451	2	4090	0.208403
GO:0072382	minus-end-directed vesicle transport along microtubule	biological_process	11	Kifc1	1	451	2	4090	0.208403
GO:0098966	perisynaptic extracellular matrix	cellular_component	5	Tnc	1	451	2	4090	0.208403
GO:1902445	regulation of mitochondrial membrane permeability involved in programmed necrotic cell death	biological_process	9	Alkbh7	1	451	2	4090	0.208403
GO:0009982	pseudouridine synthase activity	molecular_function	6	Rpusd3	1	451	2	4090	0.208403
GO:0007006	mitochondrial membrane organization	biological_process	7	Cln8	1	451	2	4090	0.208403
GO:0004532	exoribonuclease activity	molecular_function	8	Cnot7	1	451	2	4090	0.208403
GO:0004126	cytidine deaminase activity	molecular_function	7	Aicda	1	451	2	4090	0.208403
GO:0071001	U4/U6 snRNP	cellular_component	8	Ppih	1	451	2	4090	0.208403
GO:1905167	positive regulation of lysosomal protein catabolic process	biological_process	11	Lrp1	1	451	2	4090	0.208403
GO:0030449	regulation of complement activation	biological_process	7	Cr1l	1	451	2	4090	0.208403
GO:0003420	regulation of growth plate cartilage chondrocyte proliferation	biological_process	7	Carm1	1	451	2	4090	0.208403
GO:0038031	non-canonical Wnt signaling pathway via JNK cascade	biological_process	10	Fzd10	1	451	2	4090	0.208403
GO:0031643	positive regulation of myelination	biological_process	7	Tppp	1	451	2	4090	0.208403
GO:0003138	primary heart field specification	biological_process	8	Mef2c	1	451	2	4090	0.208403
GO:0000455	enzyme-directed rRNA pseudouridine synthesis	biological_process	14	Rpusd3	1	451	2	4090	0.208403
GO:0033269	internode region of axon	cellular_component	6	Tubb4a	1	451	2	4090	0.208403
GO:0050700	CARD domain binding	molecular_function	6	Nod1	1	451	2	4090	0.208403
GO:0060447	bud outgrowth involved in lung branching	biological_process	8	Tnc	1	451	2	4090	0.208403
GO:1901077	regulation of relaxation of muscle	biological_process	8	Pln	1	451	2	4090	0.208403
GO:0048408	epidermal growth factor binding	molecular_function	6	Shc1	1	451	2	4090	0.208403
GO:0002360	T cell lineage commitment	biological_process	6	Il7	1	451	2	4090	0.208403
GO:0048039	ubiquinone binding	molecular_function	6	mt-Nd4	1	451	2	4090	0.208403
GO:0048245	eosinophil chemotaxis	biological_process	7	Hrh1	1	451	2	4090	0.208403
GO:0044752	response to human chorionic gonadotropin	biological_process	7	Gclc	1	451	2	4090	0.208403
GO:0005655	nucleolar ribonuclease P complex	cellular_component	9	Rpp21	1	451	2	4090	0.208403
GO:0150099	neuron-glial cell signaling	biological_process	6	Adra1a	1	451	2	4090	0.208403
GO:0030502	negative regulation of bone mineralization	biological_process	8	Bcor	1	451	2	4090	0.208403
GO:0032133	chromosome passenger complex	cellular_component	5	Incenp	1	451	2	4090	0.208403
GO:0050671	positive regulation of lymphocyte proliferation	biological_process	10	Zfp335	1	451	2	4090	0.208403
GO:1900149	positive regulation of Schwann cell migration	biological_process	12	Lrp1	1	451	2	4090	0.208403
GO:0051625	epinephrine uptake	biological_process	10	Slc29a4	1	451	2	4090	0.208403
GO:0070945	neutrophil mediated killing of gram-negative bacterium	biological_process	12	Trem1	1	451	2	4090	0.208403
GO:0032713	negative regulation of interleukin-4 production	biological_process	8	Lef1	1	451	2	4090	0.208403
GO:0015711	organic anion transport	biological_process	8	Atp8b1	1	451	2	4090	0.208403
GO:0021650	vestibulocochlear nerve formation	biological_process	6	Atp8b1	1	451	2	4090	0.208403
GO:0032591	dendritic spine membrane	cellular_component	7	Akap5	1	451	2	4090	0.208403
GO:0002070	epithelial cell maturation	biological_process	6	Pgr	1	451	2	4090	0.208403
GO:0003231	cardiac ventricle development	biological_process	6	Fgf9	1	451	2	4090	0.208403
GO:0070368	positive regulation of hepatocyte differentiation	biological_process	9	Mesp1	1	451	2	4090	0.208403
GO:0032593	insulin-responsive compartment	cellular_component	9	Lrp1	1	451	2	4090	0.208403
GO:1901537	positive regulation of DNA demethylation	biological_process	9	Usp9x	1	451	2	4090	0.208403
GO:1902305	regulation of sodium ion transmembrane transport	biological_process	10	Atp2b4	1	451	2	4090	0.208403
GO:0008078	mesodermal cell migration	biological_process	8	Mesp1	1	451	2	4090	0.208403
GO:0008504	monoamine transmembrane transporter activity	molecular_function	6	Slc29a4	1	451	2	4090	0.208403
GO:0090286	cytoskeletal anchoring at nuclear membrane	biological_process	7	Syne1	1	451	2	4090	0.208403
GO:0060290	transdifferentiation	biological_process	6	Mef2c	1	451	2	4090	0.208403
GO:0098691	dopaminergic synapse	cellular_component	4	Adra1a	1	451	2	4090	0.208403
GO:0045627	positive regulation of T-helper 1 cell differentiation	biological_process	11	Ccr2	1	451	2	4090	0.208403
GO:0048499	synaptic vesicle membrane organization	biological_process	6	Syngr1	1	451	2	4090	0.208403
GO:0051960	regulation of nervous system development	biological_process	7	Grn	1	451	2	4090	0.208403
GO:0031698	beta-2 adrenergic receptor binding	molecular_function	8	Akap5	1	451	2	4090	0.208403
GO:1904058	positive regulation of sensory perception of pain	biological_process	9	Ptafr	1	451	2	4090	0.208403
GO:0045475	locomotor rhythm	biological_process	5	Ciart	1	451	2	4090	0.208403
GO:0060591	chondroblast differentiation	biological_process	6	Gdf5	1	451	2	4090	0.208403
GO:0015721	bile acid and bile salt transport	biological_process	8	Atp8b1	1	451	2	4090	0.208403
GO:0035883	enteroendocrine cell differentiation	biological_process	9	Gm38655	1	451	2	4090	0.208403
GO:0032479	regulation of type I interferon production	biological_process	7	Trex1	1	451	2	4090	0.208403
GO:0071305	cellular response to vitamin D	biological_process	8	Tnc	1	451	2	4090	0.208403
GO:0006301	postreplication repair	biological_process	9	Rad18	1	451	2	4090	0.208403
GO:0003376	sphingosine-1-phosphate receptor signaling pathway	biological_process	6	Sphk2	1	451	2	4090	0.208403
GO:0048386	positive regulation of retinoic acid receptor signaling pathway	biological_process	9	Asxl1	1	451	2	4090	0.208403
GO:0015816	glycine transport	biological_process	8	Slc36a1	1	451	2	4090	0.208403
GO:0008641	ubiquitin-like modifier activating enzyme activity	molecular_function	6	Uba1	1	451	2	4090	0.208403
GO:0060536	cartilage morphogenesis	biological_process	6	Mef2c	1	451	2	4090	0.208403
GO:0021523	somatic motor neuron differentiation	biological_process	8	Cln8	1	451	2	4090	0.208403
GO:0010997	anaphase-promoting complex binding	molecular_function	5	Clspn	1	451	2	4090	0.208403
GO:0090435	protein localization to nuclear envelope	biological_process	9	Tor1aip2	1	451	2	4090	0.208403
GO:0048247	lymphocyte chemotaxis	biological_process	6	Cxcl16	1	451	2	4090	0.208403
GO:0032946	positive regulation of mononuclear cell proliferation	biological_process	9	St6gal1	1	451	2	4090	0.208403
GO:0014009	glial cell proliferation	biological_process	4	Sox11	1	451	2	4090	0.208403
GO:0010745	negative regulation of macrophage derived foam cell differentiation	biological_process	8	Adipoq	1	451	2	4090	0.208403
GO:0010694	positive regulation of alkaline phosphatase activity	biological_process	12	Mef2c	1	451	2	4090	0.208403
GO:0072422	signal transduction involved in DNA damage checkpoint	biological_process	8	Trex1	1	451	2	4090	0.208403
GO:1902747	negative regulation of lens fiber cell differentiation	biological_process	9	Spry1	1	451	2	4090	0.208403
GO:0047760	butyrate-CoA ligase activity	molecular_function	7	Acss3	1	451	2	4090	0.208403
GO:1901386	negative regulation of voltage-gated calcium channel activity	biological_process	9	Gpr35	1	451	2	4090	0.208403
GO:0060740	prostate gland epithelium morphogenesis	biological_process	7	Tnc	1	451	2	4090	0.208403
GO:0017050	D-erythro-sphingosine kinase activity	molecular_function	7	Sphk2	1	451	2	4090	0.208403
GO:0016274	protein-arginine N-methyltransferase activity	molecular_function	8	Carm1	1	451	2	4090	0.208403
GO:0097167	circadian regulation of translation	biological_process	10	Hnrnpd	1	451	2	4090	0.208403
GO:0031666	positive regulation of lipopolysaccharide-mediated signaling pathway	biological_process	8	Prkca	1	451	2	4090	0.208403
GO:0051005	negative regulation of lipoprotein lipase activity	biological_process	9	Hdac9	1	451	2	4090	0.208403
GO:0060947	cardiac vascular smooth muscle cell differentiation	biological_process	7	Mesp1	1	451	2	4090	0.208403
GO:0048691	positive regulation of axon extension involved in regeneration	biological_process	9	Lrp1	1	451	2	4090	0.208403
GO:0008635	activation of cysteine-type endopeptidase activity involved in apoptotic process by cytochrome c	biological_process	12	Cycs	1	451	2	4090	0.208403
GO:0022829	wide pore channel activity	molecular_function	7	Panx2	1	451	2	4090	0.208403
GO:0008469	histone-arginine N-methyltransferase activity	molecular_function	9	Carm1	1	451	2	4090	0.208403
GO:1905517	macrophage migration	biological_process	6	Ccr2	1	451	2	4090	0.208403
GO:0002090	regulation of receptor internalization	biological_process	7	Nsf	1	451	2	4090	0.208403
GO:0042719	mitochondrial intermembrane space protein transporter complex	cellular_component	5	Timm13	1	451	2	4090	0.208403
GO:0051615	histamine uptake	biological_process	7	Slc29a4	1	451	2	4090	0.208403
GO:0071866	negative regulation of apoptotic process in bone marrow cell	biological_process	10	Lef1	1	451	2	4090	0.208403
GO:0046890	regulation of lipid biosynthetic process	biological_process	7	Trex1	1	451	2	4090	0.208403
GO:0030314	junctional membrane complex	cellular_component	4	Trdn	1	451	2	4090	0.208403
GO:0060545	positive regulation of necroptotic process	biological_process	10	Zbp1	1	451	2	4090	0.208403
GO:0097733	photoreceptor cell cilium	cellular_component	6	Rp1	1	451	2	4090	0.208403
GO:1990839	response to endothelin	biological_process	7	Shc1	1	451	2	4090	0.208403
GO:0043368	positive T cell selection	biological_process	5	Bcl11b	1	451	2	4090	0.208403
GO:0008481	sphinganine kinase activity	molecular_function	8	Sphk2	1	451	2	4090	0.208403
GO:1903426	regulation of reactive oxygen species biosynthetic process	biological_process	7	Sphk2	1	451	2	4090	0.208403
GO:1905098	negative regulation of guanyl-nucleotide exchange factor activity	biological_process	8	Stmn1	1	451	2	4090	0.208403
GO:0071895	odontoblast differentiation	biological_process	9	Lef1	1	451	2	4090	0.208403
GO:0000375	RNA splicing, via transesterification reactions	biological_process	11	Wdr83	1	451	2	4090	0.208403
GO:1903243	negative regulation of cardiac muscle hypertrophy in response to stress	biological_process	11	Atp2b4	1	451	2	4090	0.208403
GO:0009451	RNA modification	biological_process	9	Rpusd3	1	451	2	4090	0.208403
GO:0031262	Ndc80 complex	cellular_component	4	Nuf2	1	451	2	4090	0.208403
GO:0051712	positive regulation of killing of cells of other organism	biological_process	7	Fcer2a	1	451	2	4090	0.208403
GO:0003241	growth involved in heart morphogenesis	biological_process	6	Mesp1	1	451	2	4090	0.208403
GO:1901020	negative regulation of calcium ion transmembrane transporter activity	biological_process	8	Pln	1	451	2	4090	0.208403
GO:0090494	dopamine uptake	biological_process	10	Slc29a4	1	451	2	4090	0.208403
GO:0035246	peptidyl-arginine N-methylation	biological_process	12	Carm1	1	451	2	4090	0.208403
GO:0003337	mesenchymal to epithelial transition involved in metanephros morphogenesis	biological_process	8	Sall1	1	451	2	4090	0.208403
GO:0016410	N-acyltransferase activity	molecular_function	7	Cers5	1	451	2	4090	0.208403
GO:1904417	positive regulation of xenophagy	biological_process	8	Nod1	1	451	2	4090	0.208403
GO:0016595	glutamate binding	molecular_function	8	Gclc	1	451	2	4090	0.208403
GO:0042590	antigen processing and presentation of exogenous peptide antigen via MHC class I	biological_process	7	Clec4a2	1	451	2	4090	0.208403
GO:0002827	positive regulation of T-helper 1 type immune response	biological_process	10	Ccr2	1	451	2	4090	0.208403
GO:0010883	regulation of lipid storage	biological_process	5	Alkbh7	1	451	2	4090	0.208403
GO:0004792	thiosulfate sulfurtransferase activity	molecular_function	7	Tstd3	1	451	2	4090	0.208403
GO:0032959	inositol trisphosphate biosynthetic process	biological_process	9	Ptafr	1	451	2	4090	0.208403
GO:0044211	CTP salvage	biological_process	13	Uckl1	1	451	2	4090	0.208403
GO:0004984	olfactory receptor activity	molecular_function	6	Olfr18	1	451	2	4090	0.208403
GO:0016810	hydrolase activity, acting on carbon-nitrogen (but not peptide) bonds	molecular_function	5	Dpysl3	1	451	2	4090	0.208403
GO:2000473	positive regulation of hematopoietic stem cell migration	biological_process	9	Ccr2	1	451	2	4090	0.208403
GO:0003847	1-alkyl-2-acetylglycerophosphocholine esterase activity	molecular_function	7	Pla2g6	1	451	2	4090	0.208403
GO:0045715	negative regulation of low-density lipoprotein particle receptor biosynthetic process	biological_process	10	Adipoq	1	451	2	4090	0.208403
GO:0001961	positive regulation of cytokine-mediated signaling pathway	biological_process	9	Il7	1	451	2	4090	0.208403
GO:0015101	organic cation transmembrane transporter activity	molecular_function	7	Slc29a4	1	451	2	4090	0.208403
GO:0004816	asparagine-tRNA ligase activity	molecular_function	7	Nars2	1	451	2	4090	0.208403
GO:0001997	positive regulation of the force of heart contraction by epinephrine-norepinephrine	biological_process	12	Adra1a	1	451	2	4090	0.208403
GO:0070345	negative regulation of fat cell proliferation	biological_process	8	E2f3	1	451	2	4090	0.208403
GO:0097413	Lewy body	cellular_component	6	Sqstm1	1	451	2	4090	0.208403
GO:0061789	dense core granule priming	biological_process	8	Unc13b	1	451	2	4090	0.208403
GO:0102991	myristoyl-CoA hydrolase activity	molecular_function	7	Pla2g6	1	451	2	4090	0.208403
GO:2000320	negative regulation of T-helper 17 cell differentiation	biological_process	9	Zbtb7b	1	451	2	4090	0.208403
GO:0060484	lung-associated mesenchyme development	biological_process	7	Fgf9	1	451	2	4090	0.208403
GO:0031419	cobalamin binding	molecular_function	5	Mmab	1	451	2	4090	0.208403
GO:0060414	aorta smooth muscle tissue morphogenesis	biological_process	7	Prox1	1	451	2	4090	0.208403
GO:0032446	protein modification by small protein conjugation	biological_process	10	Uba1	1	451	2	4090	0.208403
GO:0051920	peroxiredoxin activity	molecular_function	4	Prdx5	1	451	2	4090	0.208403
GO:0042007	interleukin-18 binding	molecular_function	6	Il18r1	1	451	2	4090	0.208403
GO:0055091	phospholipid homeostasis	biological_process	9	Rcn3	1	451	2	4090	0.208403
GO:0090168	Golgi reassembly	biological_process	7	Vcpip1	1	451	2	4090	0.208403
GO:0038036	sphingosine-1-phosphate receptor activity	molecular_function	8	Sphk2	1	451	2	4090	0.208403
GO:0061303	cornea development in camera-type eye	biological_process	5	Sox11	1	451	2	4090	0.208403
GO:0032637	interleukin-8 production	biological_process	5	Nod1	1	451	2	4090	0.208403
GO:0001306	age-dependent response to oxidative stress	biological_process	6	Cln8	1	451	2	4090	0.208403
GO:0008608	attachment of spindle microtubules to kinetochore	biological_process	5	Nuf2	1	451	2	4090	0.208403
GO:0036037	CD8-positive, alpha-beta T cell activation	biological_process	9	Clec4a2	1	451	2	4090	0.208403
GO:0030272	5-formyltetrahydrofolate cyclo-ligase activity	molecular_function	7	Mthfs	1	451	2	4090	0.208403
GO:0060298	positive regulation of sarcomere organization	biological_process	9	Prox1	1	451	2	4090	0.208403
GO:0043270	positive regulation of ion transport	biological_process	8	P2ry12	1	451	2	4090	0.208403
GO:0003150	muscular septum morphogenesis	biological_process	7	Fzd2	1	451	2	4090	0.208403
GO:0006203	dGTP catabolic process	biological_process	12	Samhd1	1	451	2	4090	0.208403
GO:1904044	response to aldosterone	biological_process	9	Cyba	1	451	2	4090	0.208403
GO:0042730	fibrinolysis	biological_process	9	Gp1ba	1	451	2	4090	0.208403
GO:1905461	positive regulation of vascular associated smooth muscle cell apoptotic process	biological_process	12	E2f3	1	451	2	4090	0.208403
GO:0070495	negative regulation of thrombin-activated receptor signaling pathway	biological_process	10	Stmn1	1	451	2	4090	0.208403
GO:0050805	negative regulation of synaptic transmission	biological_process	8	Adipoq	1	451	2	4090	0.208403
GO:1990834	response to odorant	biological_process	5	Cfap69	1	451	2	4090	0.208403
GO:2000121	regulation of removal of superoxide radicals	biological_process	9	Dhfr	1	451	2	4090	0.208403
GO:0019725	cellular homeostasis	biological_process	4	Ccr2	1	451	2	4090	0.208403
GO:0046469	platelet activating factor metabolic process	biological_process	9	Pla2g6	1	451	2	4090	0.208403
GO:0021782	glial cell development	biological_process	6	Sox11	1	451	2	4090	0.208403
GO:0006091	generation of precursor metabolites and energy	biological_process	5	Trex1	1	451	2	4090	0.208403
GO:0090279	regulation of calcium ion import	biological_process	10	Pln	1	451	2	4090	0.208403
GO:2000678	negative regulation of transcription regulatory region DNA binding	biological_process	8	Sox11	1	451	2	4090	0.208403
GO:0045545	syndecan binding	molecular_function	6	Tnc	1	451	2	4090	0.208403
GO:0006937	regulation of muscle contraction	biological_process	8	Adra1a	1	451	2	4090	0.208403
GO:0090175	regulation of establishment of planar polarity	biological_process	8	Jhy	1	451	2	4090	0.208403
GO:0009972	cytidine deamination	biological_process	13	Aicda	1	451	2	4090	0.208403
GO:0010631	epithelial cell migration	biological_process	8	Fat2	1	451	2	4090	0.208403
GO:0030284	estrogen receptor activity	molecular_function	6	Lef1	1	451	2	4090	0.208403
GO:0007521	muscle cell fate determination	biological_process	6	Mef2c	1	451	2	4090	0.208403
GO:0044791	positive regulation by host of viral release from host cell	biological_process	9	Zfp72	1	451	2	4090	0.208403
GO:1900127	positive regulation of hyaluronan biosynthetic process	biological_process	9	Has2	1	451	2	4090	0.208403
GO:0017171	serine hydrolase activity	molecular_function	5	Pla2g6	1	451	2	4090	0.208403
GO:0071474	cellular hyperosmotic response	biological_process	7	Ybx3	1	451	2	4090	0.208403
GO:0016799	hydrolase activity, hydrolyzing N-glycosyl compounds	molecular_function	6	Neil2	1	451	2	4090	0.208403
GO:0045760	positive regulation of action potential	biological_process	6	Adra1a	1	451	2	4090	0.208403
GO:0001973	adenosine receptor signaling pathway	biological_process	7	P2ry12	1	451	2	4090	0.208403
GO:0043928	exonucleolytic catabolism of deadenylated mRNA	biological_process	13	Cnot7	1	451	2	4090	0.208403
GO:0004866	endopeptidase inhibitor activity	molecular_function	7	Serpina1b	1	451	2	4090	0.208403
GO:0051764	actin crosslink formation	biological_process	7	Dpysl3	1	451	2	4090	0.208403
GO:0006536	glutamate metabolic process	biological_process	11	Gclc	1	451	2	4090	0.208403
GO:0004969	histamine receptor activity	molecular_function	8	Hrh1	1	451	2	4090	0.208403
GO:0003854	3-beta-hydroxy-delta5-steroid dehydrogenase activity	molecular_function	7	Hsd3b7	1	451	2	4090	0.208403
GO:0090238	positive regulation of arachidonic acid secretion	biological_process	10	Pla2g6	1	451	2	4090	0.208403
GO:0002763	positive regulation of myeloid leukocyte differentiation	biological_process	9	Cd101	1	451	2	4090	0.208403
GO:0030681	multimeric ribonuclease P complex	cellular_component	8	Rpp21	1	451	2	4090	0.208403
GO:0010870	positive regulation of receptor biosynthetic process	biological_process	9	Cdk5r1	1	451	2	4090	0.208403
GO:0034711	inhibin binding	molecular_function	5	Inha	1	451	2	4090	0.208403
GO:0010751	negative regulation of nitric oxide mediated signal transduction	biological_process	10	Atp2b4	1	451	2	4090	0.208403
GO:1900029	positive regulation of ruffle assembly	biological_process	10	P2ry12	1	451	2	4090	0.208403
GO:1904666	regulation of ubiquitin protein ligase activity	biological_process	12	Pclo	1	451	2	4090	0.208403
GO:0001730	2'-5'-oligoadenylate synthetase activity	molecular_function	8	Oasl2	1	451	2	4090	0.208403
GO:0034969	histone arginine methylation	biological_process	12	Carm1	1	451	2	4090	0.208403
GO:0090280	positive regulation of calcium ion import	biological_process	10	Sphk2	1	451	2	4090	0.208403
GO:0097228	sperm principal piece	cellular_component	5	Atp2b4	1	451	2	4090	0.208403
GO:0001739	sex chromatin	cellular_component	9	Pcgf2	1	451	2	4090	0.208403
GO:0046654	tetrahydrofolate biosynthetic process	biological_process	8	Dhfr	1	451	2	4090	0.208403
GO:1905050	positive regulation of metallopeptidase activity	biological_process	11	Cldn4	1	451	2	4090	0.208403
GO:1905719	protein localization to perinuclear region of cytoplasm	biological_process	6	Sqstm1	1	451	2	4090	0.208403
GO:0032984	protein-containing complex disassembly	biological_process	6	Nsf	1	451	2	4090	0.208403
GO:0021773	striatal medium spiny neuron differentiation	biological_process	9	Bcl11b	1	451	2	4090	0.208403
GO:0045721	negative regulation of gluconeogenesis	biological_process	11	Adipoq	1	451	2	4090	0.208403
GO:2000779	regulation of double-strand break repair	biological_process	10	Dek	1	451	2	4090	0.208403
GO:1904306	positive regulation of gastro-intestinal system smooth muscle contraction	biological_process	11	Ptafr	1	451	2	4090	0.208403
GO:0035136	forelimb morphogenesis	biological_process	7	Gdf5	1	451	2	4090	0.208403
GO:0003073	regulation of systemic arterial blood pressure	biological_process	6	Postn	1	451	2	4090	0.208403
GO:0060350	endochondral bone morphogenesis	biological_process	7	Carm1	1	451	2	4090	0.208403
GO:0002253	activation of immune response	biological_process	4	Trex1	1	451	2	4090	0.208403
GO:0008199	ferric iron binding	molecular_function	9	Rrm2	1	451	2	4090	0.208403
GO:0019829	ATPase-coupled cation transmembrane transporter activity	molecular_function	8	Atp2b4	1	451	2	4090	0.208403
GO:0010888	negative regulation of lipid storage	biological_process	6	Asxl1	1	451	2	4090	0.208403
GO:0008142	oxysterol binding	molecular_function	7	Gpr183	1	451	2	4090	0.208403
GO:0044214	spanning component of plasma membrane	cellular_component	7	Cd5	1	451	2	4090	0.208403
GO:0000778	condensed nuclear chromosome kinetochore	cellular_component	6	Nuf2	1	451	2	4090	0.208403
GO:0007625	grooming behavior	biological_process	4	Qrfp	1	451	2	4090	0.208403
GO:0016423	tRNA (guanine) methyltransferase activity	molecular_function	9	Tarbp1	1	451	2	4090	0.208403
GO:0019511	peptidyl-proline hydroxylation	biological_process	10	P4ha3	1	451	2	4090	0.208403
GO:0060214	endocardium formation	biological_process	5	Prox1	1	451	2	4090	0.208403
GO:0071420	cellular response to histamine	biological_process	8	Hrh1	1	451	2	4090	0.208403
GO:0051620	norepinephrine uptake	biological_process	10	Slc29a4	1	451	2	4090	0.208403
GO:0005124	scavenger receptor binding	molecular_function	6	Fpr1	1	451	2	4090	0.208403
GO:0032407	MutSalpha complex binding	molecular_function	6	Trex1	1	451	2	4090	0.208403
GO:0009410	response to xenobiotic stimulus	biological_process	5	Gclc	1	451	2	4090	0.208403
GO:1901339	regulation of store-operated calcium channel activity	biological_process	9	Pla2g6	1	451	2	4090	0.208403
GO:1990266	neutrophil migration	biological_process	7	Irak4	1	451	2	4090	0.208403
GO:0030595	leukocyte chemotaxis	biological_process	5	Gpr183	1	451	2	4090	0.208403
GO:0090292	nuclear matrix anchoring at nuclear membrane	biological_process	8	Syne1	1	451	2	4090	0.208403
GO:0060836	lymphatic endothelial cell differentiation	biological_process	8	Prox1	1	451	2	4090	0.208403
GO:2000584	negative regulation of platelet-derived growth factor receptor-alpha signaling pathway	biological_process	10	Adipoq	1	451	2	4090	0.208403
GO:0016554	cytidine to uridine editing	biological_process	11	Aicda	1	451	2	4090	0.208403
GO:0070125	mitochondrial translational elongation	biological_process	9	Tsfm	1	451	2	4090	0.208403
GO:0035137	hindlimb morphogenesis	biological_process	7	Gdf5	1	451	2	4090	0.208403
GO:0045917	positive regulation of complement activation	biological_process	8	C6	1	451	2	4090	0.208403
GO:0008209	androgen metabolic process	biological_process	7	Dhrs9	1	451	2	4090	0.208403
GO:0000290	deadenylation-dependent decapping of nuclear-transcribed mRNA	biological_process	12	Cnot7	1	451	2	4090	0.208403
GO:0005326	neurotransmitter transporter activity	molecular_function	4	Slc29a4	1	451	2	4090	0.208403
GO:1902806	regulation of cell cycle G1/S phase transition	biological_process	9	Atp2b4	1	451	2	4090	0.208403
GO:0015180	L-alanine transmembrane transporter activity	molecular_function	9	Slc36a1	1	451	2	4090	0.208403
GO:0070365	hepatocyte differentiation	biological_process	7	Prox1	1	451	2	4090	0.208403
GO:0003308	negative regulation of Wnt signaling pathway involved in heart development	biological_process	10	Alpk2	1	451	2	4090	0.208403
GO:0009062	fatty acid catabolic process	biological_process	10	Lpin3	1	451	2	4090	0.208403
GO:0034247	snoRNA splicing	biological_process	11	Rnf113a1	1	451	2	4090	0.208403
GO:0060059	embryonic retina morphogenesis in camera-type eye	biological_process	6	Prox1	1	451	2	4090	0.208403
GO:0032584	growth cone membrane	cellular_component	5	Nectin1	1	451	2	4090	0.208403
GO:0043217	myelin maintenance	biological_process	7	Degs1	1	451	2	4090	0.208403
GO:0031987	locomotion involved in locomotory behavior	biological_process	4	Ppp3cb	1	451	2	4090	0.208403
GO:0004849	uridine kinase activity	molecular_function	9	Uckl1	1	451	2	4090	0.208403
GO:0061034	olfactory bulb mitral cell layer development	biological_process	5	Sall1	1	451	2	4090	0.208403
GO:0001996	positive regulation of heart rate by epinephrine-norepinephrine	biological_process	11	Adra1a	1	451	2	4090	0.208403
GO:0086011	membrane repolarization during action potential	biological_process	9	Kcne3	1	451	2	4090	0.208403
GO:0035021	negative regulation of Rac protein signal transduction	biological_process	12	Arhgap24	1	451	2	4090	0.208403
GO:1903825	organic acid transmembrane transport	biological_process	8	Slc29a4	1	451	2	4090	0.208403
GO:0010002	cardioblast differentiation	biological_process	7	Gm49333	1	451	2	4090	0.208403
GO:0042107	cytokine metabolic process	biological_process	7	Trem1	1	451	2	4090	0.208403
GO:0006851	mitochondrial calcium ion transmembrane transport	biological_process	12	Bhlha15	1	451	2	4090	0.208403
GO:0002193	MAML1-RBP-Jkappa- ICN1 complex	cellular_component	4	Maml1	1	451	2	4090	0.208403
GO:0016480	negative regulation of transcription by RNA polymerase III	biological_process	10	Prdx5	1	451	2	4090	0.208403
GO:1902415	regulation of mRNA binding	biological_process	7	Carm1	1	451	2	4090	0.208403
GO:0000076	DNA replication checkpoint	biological_process	6	Clspn	1	451	2	4090	0.208403
GO:0043247	telomere maintenance in response to DNA damage	biological_process	9	Rtel1	1	451	2	4090	0.208403
GO:0046549	retinal cone cell development	biological_process	9	Rp1	1	451	2	4090	0.208403
GO:0031497	chromatin assembly	biological_process	7	Chaf1a	1	451	2	4090	0.208403
GO:0005971	ribonucleoside-diphosphate reductase complex	cellular_component	7	Rrm2	1	451	2	4090	0.208403
GO:0034351	negative regulation of glial cell apoptotic process	biological_process	10	Prkca	1	451	2	4090	0.208403
GO:0043114	regulation of vascular permeability	biological_process	7	Hrh1	1	451	2	4090	0.208403
GO:1905563	negative regulation of vascular endothelial cell proliferation	biological_process	10	Mef2c	1	451	2	4090	0.208403
GO:0004875	complement receptor activity	molecular_function	6	Fpr1	1	451	2	4090	0.208403
GO:0150051	postsynaptic Golgi apparatus	cellular_component	7	Tppp	1	451	2	4090	0.208403
GO:0002829	negative regulation of type 2 immune response	biological_process	8	Ccr2	1	451	2	4090	0.208403
GO:0032534	regulation of microvillus assembly	biological_process	10	Atp8b1	1	451	2	4090	0.208403
GO:0006562	proline catabolic process	biological_process	12	Prodh	1	451	2	4090	0.208403
GO:0070678	preprotein binding	molecular_function	5	Tomm40l	1	451	2	4090	0.208403
GO:0006054	N-acetylneuraminate metabolic process	biological_process	7	St6gal1	1	451	2	4090	0.208403
GO:2000110	negative regulation of macrophage apoptotic process	biological_process	11	St6gal1	1	451	2	4090	0.208403
GO:0032795	heterotrimeric G-protein binding	molecular_function	5	Cetn4	1	451	2	4090	0.208403
GO:0050755	chemokine metabolic process	biological_process	8	Trem1	1	451	2	4090	0.208403
GO:0010606	positive regulation of cytoplasmic mRNA processing body assembly	biological_process	8	Cnot1	1	451	2	4090	0.208403
GO:0006729	tetrahydrobiopterin biosynthetic process	biological_process	8	Dhfr	1	451	2	4090	0.208403
GO:0051409	response to nitrosative stress	biological_process	5	Gclc	1	451	2	4090	0.208403
GO:1903169	regulation of calcium ion transmembrane transport	biological_process	10	Hrc	1	451	2	4090	0.208403
GO:0045650	negative regulation of macrophage differentiation	biological_process	10	Adipoq	1	451	2	4090	0.208403
GO:1900024	regulation of substrate adhesion-dependent cell spreading	biological_process	9	St6gal1	1	451	2	4090	0.208403
GO:0051387	negative regulation of neurotrophin TRK receptor signaling pathway	biological_process	9	Spry1	1	451	2	4090	0.208403
GO:0050716	positive regulation of interleukin-1 secretion	biological_process	9	Panx2	1	451	2	4090	0.208403
GO:0060748	tertiary branching involved in mammary gland duct morphogenesis	biological_process	5	Pgr	1	451	2	4090	0.208403
GO:0016559	peroxisome fission	biological_process	7	Pex11g	1	451	2	4090	0.208403
GO:0048846	axon extension involved in axon guidance	biological_process	8	Alcam	1	451	2	4090	0.208403
GO:2000054	negative regulation of Wnt signaling pathway involved in dorsal/ventral axis specification	biological_process	10	Axin2	1	451	2	4090	0.208403
GO:0030212	hyaluronan metabolic process	biological_process	8	Has2	1	451	2	4090	0.208403
GO:2000279	negative regulation of DNA biosynthetic process	biological_process	9	Adipoq	1	451	2	4090	0.208403
GO:0051983	regulation of chromosome segregation	biological_process	6	Mki67	1	451	2	4090	0.208403
GO:0044242	cellular lipid catabolic process	biological_process	7	Lrp1	1	451	2	4090	0.208403
GO:0055009	atrial cardiac muscle tissue morphogenesis	biological_process	8	Prox1	1	451	2	4090	0.208403
GO:0008083	growth factor activity	molecular_function	7	Il7;Gdf11;Fgf9;Inha;Gdf5	5	451	29	4090	0.209585
GO:0050870	positive regulation of T cell activation	biological_process	9	Ccr2;Ccdc88b	2	451	8	4090	0.217843
GO:0042100	B cell proliferation	biological_process	8	Mef2c;Lef1	2	451	8	4090	0.217843
GO:0005484	SNAP receptor activity	molecular_function	5	Stx16;Stx19	2	451	8	4090	0.217843
GO:1900153	positive regulation of nuclear-transcribed mRNA catabolic process, deadenylation-dependent decay	biological_process	10	Cnot7;Cnot1	2	451	8	4090	0.217843
GO:0060349	bone morphogenesis	biological_process	6	Has2;Pappa2	2	451	8	4090	0.217843
GO:0035024	negative regulation of Rho protein signal transduction	biological_process	12	Stmn1;Adra1a	2	451	8	4090	0.217843
GO:0019956	chemokine binding	molecular_function	6	Ccr9;Ccr2	2	451	8	4090	0.217843
GO:0001654	eye development	biological_process	7	Foxc1;Fgf9	2	451	8	4090	0.217843
GO:0042813	Wnt-activated receptor activity	molecular_function	6	Fzd2;Fzd10	2	451	8	4090	0.217843
GO:0048469	cell maturation	biological_process	5	Gdf11;Bhlha15	2	451	8	4090	0.217843
GO:0090336	positive regulation of brown fat cell differentiation	biological_process	9	Fndc5;Zbtb7b	2	451	8	4090	0.217843
GO:0019731	antibacterial humoral response	biological_process	7	Wfdc17;Pla2g6	2	451	8	4090	0.217843
GO:0016493	C-C chemokine receptor activity	molecular_function	9	Ccr2;Ccr9	2	451	8	4090	0.217843
GO:0002027	regulation of heart rate	biological_process	9	Hrc;Bves	2	451	8	4090	0.217843
GO:0001782	B cell homeostasis	biological_process	6	Mef2c;Gapt	2	451	8	4090	0.217843
GO:0042974	retinoic acid receptor binding	molecular_function	8	Asxl1;Cnot1	2	451	8	4090	0.217843
GO:0051481	negative regulation of cytosolic calcium ion concentration	biological_process	13	Hrc;Lrp1	2	451	8	4090	0.217843
GO:0005921	gap junction	cellular_component	5	Panx2;Ybx3	2	451	8	4090	0.217843
GO:0008080	N-acetyltransferase activity	molecular_function	8	Nat8f4;Nat9	2	451	8	4090	0.217843
GO:0010467	gene expression	biological_process	6	Mesp1;Adipoq	2	451	8	4090	0.217843
GO:0007566	embryo implantation	biological_process	4	Grn;Ggn	2	451	8	4090	0.217843
GO:0004540	ribonuclease activity	molecular_function	7	Ear1;Samhd1	2	451	8	4090	0.217843
GO:0017147	Wnt-protein binding	molecular_function	5	Fzd2;Fzd10	2	451	8	4090	0.217843
GO:0032874	positive regulation of stress-activated MAPK cascade	biological_process	12	Taok3;Nod1	2	451	8	4090	0.217843
GO:0030073	insulin secretion	biological_process	11	Ffar1;Pclo	2	451	8	4090	0.217843
GO:0046513	ceramide biosynthetic process	biological_process	10	Cers5;Degs1	2	451	8	4090	0.217843
GO:0016328	lateral plasma membrane	cellular_component	5	Gpsm2;Cldn4;Myo1a;Bves	4	451	22	4090	0.218759
GO:0060548	negative regulation of cell death	biological_process	7	Rad18;Lrp1;Sox11;Htr2b	4	451	22	4090	0.218759
GO:0045335	phagocytic vesicle	cellular_component	8	Pld4;Nod1;Rab43;Ambra1	4	451	22	4090	0.218759
GO:0006813	potassium ion transport	biological_process	9	Kcng1;Nsf;Kcne3;Kcnn4	4	451	22	4090	0.218759
GO:0048661	positive regulation of smooth muscle cell proliferation	biological_process	8	Cyba;Shc1;Ptafr;Irak4	4	451	22	4090	0.218759
GO:0002376	immune system process	biological_process	3	Padi4;C6;Kcnn4;C9;Ly9;Nod1;Irak4;Samhd1;Pld4;Clec4a2;Cr1l;Sqstm1;Alcam;Gpr183;Cd8a;Zbp1;Naip2;Ifi202b;Oasl2	19	451	143	4090	0.224417
GO:0010942	positive regulation of cell death	biological_process	7	Lrp1;Nod1;Axin2	3	451	15	4090	0.224658
GO:0030178	negative regulation of Wnt signaling pathway	biological_process	9	Fgf9;Dkk2;Tax1bp3	3	451	15	4090	0.224658
GO:0060041	retina development in camera-type eye	biological_process	5	Cln8;Nectin1;Rp1	3	451	15	4090	0.224658
GO:0008236	serine-type peptidase activity	molecular_function	6	F10;Htra3;Prss23	3	451	15	4090	0.224658
GO:0005546	phosphatidylinositol-4,5-bisphosphate binding	molecular_function	9	Syt10;Syt9;Mtss2	3	451	15	4090	0.224658
GO:0014823	response to activity	biological_process	4	Adipoq;Cyba;Gclc	3	451	15	4090	0.224658
GO:0001657	ureteric bud development	biological_process	7	Spry1;Foxc1;Gdf11	3	451	15	4090	0.224658
GO:0000976	transcription regulatory region sequence-specific DNA binding	molecular_function	8	Zfp335;Lef1;Carm1;Runx1;Foxc1;Prox1;Tcf20;Bcor;Mesp1;Sox11;Tfap2a;Mef2c;Ciart	13	451	94	4090	0.232113
GO:0007156	homophilic cell adhesion via plasma membrane adhesion molecules	biological_process	7	Fat2;Obsl1;Pcdhga11;Nectin1;Pcdha11;Pcdhga3	6	451	38	4090	0.236392
GO:0006260	DNA replication	biological_process	8	Trex1;Samhd1;Recql;Rtel1;Rrm2;Gins3;Chaf1a	7	451	46	4090	0.239122
GO:0050790	regulation of catalytic activity	biological_process	5	Scg5;Trex1;Gpsm2;Pcgf2	4	451	23	4090	0.243529
GO:0008237	metallopeptidase activity	molecular_function	7	Rnpepl1;Adam6b;Pappa2;Gm49333;Cpz	5	451	31	4090	0.251954
GO:0050896	response to stimulus	biological_process	3	Olfr18;Rp1;Cfap69	3	451	16	4090	0.255522
GO:0003151	outflow tract morphogenesis	biological_process	5	Mef2c;Sox11;Fzd2	3	451	16	4090	0.255522
GO:0071300	cellular response to retinoic acid	biological_process	7	Ptk6;Mef2c;Tnc	3	451	16	4090	0.255522
GO:0030672	synaptic vesicle membrane	cellular_component	4	Syngr1;Unc13b;Syt9	3	451	16	4090	0.255522
GO:0006952	defense response	biological_process	5	Gm12185;Nod1;Acod1	3	451	16	4090	0.255522
GO:0001664	G protein-coupled receptor binding	molecular_function	6	Fpr1;Akap5;Qrfp	3	451	16	4090	0.255522
GO:0005543	phospholipid binding	molecular_function	5	Ptafr;Unc13b;F10	3	451	16	4090	0.255522
GO:0000792	heterochromatin	cellular_component	7	Uba1;Sall1;Uhrf1	3	451	16	4090	0.255522
GO:0010595	positive regulation of endothelial cell migration	biological_process	10	Grn;Prox1;Prkca	3	451	16	4090	0.255522
GO:0035914	skeletal muscle cell differentiation	biological_process	6	Mef2c;Zfp689;Sox11	3	451	16	4090	0.255522
GO:0005814	centriole	cellular_component	6	Alms1;Armc9;Cntln;Stard9;Pcnt;Cetn4	6	451	39	4090	0.255541
GO:0007010	cytoskeleton organization	biological_process	6	Mical3;Brwd1;Syne1;Pclo;Gpr35;Arc	6	451	39	4090	0.255541
GO:0098793	presynapse	cellular_component	4	Unc13b;Cln8;Syt10;Grn;Slc29a4;Cdk5r1	6	451	39	4090	0.255541
GO:0005102	signaling receptor binding	molecular_function	5	Pgr;Inha;Trdn;Syne1;Gdf5;Ptk6;Angptl7;Smarcd1;Wipi1;Prdx5;Adipoq;Tigit	12	451	88	4090	0.259633
GO:0034612	response to tumor necrosis factor	biological_process	7	Adipoq;Cxcl16	2	451	9	4090	0.260813
GO:0045987	positive regulation of smooth muscle contraction	biological_process	10	Adra1a;Ptafr	2	451	9	4090	0.260813
GO:0050715	positive regulation of cytokine secretion	biological_process	8	Clec9a;Htr2b	2	451	9	4090	0.260813
GO:0019957	C-C chemokine binding	molecular_function	7	Ccr2;Ccr9	2	451	9	4090	0.260813
GO:0060045	positive regulation of cardiac muscle cell proliferation	biological_process	8	Fgf9;Mef2c	2	451	9	4090	0.260813
GO:0043195	terminal bouton	cellular_component	6	Pclo;Unc13b	2	451	9	4090	0.260813
GO:0016571	histone methylation	biological_process	11	Carm1;Kmt5b	2	451	9	4090	0.260813
GO:0000421	autophagosome membrane	cellular_component	8	Wipi1;Tmem74	2	451	9	4090	0.260813
GO:0031201	SNARE complex	cellular_component	6	Stx16;Stx19	2	451	9	4090	0.260813
GO:0036120	cellular response to platelet-derived growth factor stimulus	biological_process	6	Has2;Mtss2	2	451	9	4090	0.260813
GO:0034237	protein kinase A regulatory subunit binding	molecular_function	6	Akap5;1700019D03Rik	2	451	9	4090	0.260813
GO:0007193	adenylate cyclase-inhibiting G protein-coupled receptor signaling pathway	biological_process	8	P2ry12;Akap5	2	451	9	4090	0.260813
GO:0016236	macroautophagy	biological_process	7	Sqstm1;Tmem74	2	451	9	4090	0.260813
GO:0035025	positive regulation of Rho protein signal transduction	biological_process	12	Gpr35;Gpr174	2	451	9	4090	0.260813
GO:0004180	carboxypeptidase activity	molecular_function	8	Cpz;Vash2	2	451	9	4090	0.260813
GO:0031941	filamentous actin	cellular_component	4	Dpysl3;Myo1a	2	451	9	4090	0.260813
GO:0001530	lipopolysaccharide binding	molecular_function	5	Zranb2;Ptafr	2	451	9	4090	0.260813
GO:0002053	positive regulation of mesenchymal cell proliferation	biological_process	8	Fgf9;Syne1	2	451	9	4090	0.260813
GO:0007528	neuromuscular junction development	biological_process	6	Unc13b;Tnc	2	451	9	4090	0.260813
GO:0048814	regulation of dendrite morphogenesis	biological_process	9	Syne1;Lzts1	2	451	9	4090	0.260813
GO:0001656	metanephros development	biological_process	7	Spry1;Gdf11	2	451	9	4090	0.260813
GO:0048566	embryonic digestive tract development	biological_process	7	Fgf9;Sall1	2	451	9	4090	0.260813
GO:0071480	cellular response to gamma radiation	biological_process	8	Cyba;Trex1	2	451	9	4090	0.260813
GO:0070300	phosphatidic acid binding	molecular_function	6	Rapgef6;Gramd1b	2	451	9	4090	0.260813
GO:0034614	cellular response to reactive oxygen species	biological_process	7	Prdx5;Trex1	2	451	9	4090	0.260813
GO:0071310	cellular response to organic substance	biological_process	6	Cyba;Trex1	2	451	9	4090	0.260813
GO:1990837	sequence-specific double-stranded DNA binding	molecular_function	8	E2f3;Mesp2;Bhlhe22;Zbtb7b;Bcl11b;Zfp523;Cebpe;Lef1;Mef2c;Hnrnpd;Zfp449;Foxq1;Bhlha15;Tfap2a;Prox1;Msc	16	451	122	4090	0.266449
GO:0090305	nucleic acid phosphodiester bond hydrolysis	biological_process	8	Ear1;Pld4;Trex1;Trex2;Cnot7	5	451	32	4090	0.273894
GO:0000977	RNA polymerase II regulatory region sequence-specific DNA binding	molecular_function	9	Bhlha15;Zfp523;2210418O10Rik;Foxc1;Mef2c;Bcor;Runx1;Msx3;Lef1;Ybx3;Msc;E2f3	12	451	90	4090	0.285641
GO:0009952	anterior/posterior pattern specification	biological_process	6	Arc;Pcgf2;Gdf11	3	451	17	4090	0.286917
GO:0030509	BMP signaling pathway	biological_process	10	Gdf5;Lef1;Usp9x	3	451	17	4090	0.286917
GO:0045454	cell redox homeostasis	biological_process	5	Gclc;Prdx5;Txndc8	3	451	17	4090	0.286917
GO:0005776	autophagosome	cellular_component	7	Fyco1;Ambra1;Sqstm1	3	451	17	4090	0.286917
GO:0000287	magnesium ion binding	molecular_function	7	Trex2;Papola;Irak4;Trex1;Gclc;Tssk1;Tppp;Atp8b1	8	451	57	4090	0.288941
GO:0006355	regulation of transcription, DNA-templated	biological_process	8	Foxo6;Zfp819;Prox1;Cited4;Zfp27;Zfp711;Spin4;Zfp960;Zfp57;Sox11;Bhlha15;E2f3;Carm1;2210418O10Rik;Zfp758;Runx1;Zfp473;Zfp457;Zfp719;Cebpe;Mesp2;Gon4l;Asxl1;Zfp449;Gm5141;Zfp872;Zfp947;Msx3;Zfp689;Mef2c;Tfap2a;Bcl11b;Perm1;Pgr;Zfp984;Foxc1;Zfp354a;Zfhx4;Bhlhe22;Foxq1;Zfp72;Lef1	42	451	349	4090	0.290303
GO:0003697	single-stranded DNA binding	molecular_function	7	Rad18;Ybx3;Trex1;Samhd1	4	451	25	4090	0.294675
GO:0005929	cilium	cellular_component	4	Atp2b4;Cplane1;Alms1;Tssk1;Rp1;Armc9;Cfap69;Tubb4a;Bbs10;Sord	10	451	74	4090	0.295713
GO:0015804	neutral amino acid transport	biological_process	11	Slc36a1	1	451	3	4090	0.295734
GO:0001741	XY body	cellular_component	8	Rad18	1	451	3	4090	0.295734
GO:0061029	eyelid development in camera-type eye	biological_process	5	Sox11	1	451	3	4090	0.295734
GO:0035374	chondroitin sulfate binding	molecular_function	6	Dpysl3	1	451	3	4090	0.295734
GO:0046061	dATP catabolic process	biological_process	12	Samhd1	1	451	3	4090	0.295734
GO:0004629	phospholipase C activity	molecular_function	8	Plch2	1	451	3	4090	0.295734
GO:0072557	IPAF inflammasome complex	cellular_component	5	Naip2	1	451	3	4090	0.295734
GO:0000578	embryonic axis specification	biological_process	6	Frat1	1	451	3	4090	0.295734
GO:1902260	negative regulation of delayed rectifier potassium channel activity	biological_process	10	Kcne3	1	451	3	4090	0.295734
GO:0016290	palmitoyl-CoA hydrolase activity	molecular_function	9	Pla2g6	1	451	3	4090	0.295734
GO:0002446	neutrophil mediated immunity	biological_process	7	Irak4	1	451	3	4090	0.295734
GO:0045792	negative regulation of cell size	biological_process	7	Akt1s1	1	451	3	4090	0.295734
GO:0032691	negative regulation of interleukin-1 beta production	biological_process	9	Ffar1	1	451	3	4090	0.295734
GO:0000138	Golgi trans cisterna	cellular_component	8	St6gal1	1	451	3	4090	0.295734
GO:0033280	response to vitamin D	biological_process	7	Spp1	1	451	3	4090	0.295734
GO:2000035	regulation of stem cell division	biological_process	7	Cdk2ap2	1	451	3	4090	0.295734
GO:0032620	interleukin-17 production	biological_process	5	Zbtb7b	1	451	3	4090	0.295734
GO:0019534	toxin transmembrane transporter activity	molecular_function	5	Slc29a4	1	451	3	4090	0.295734
GO:0050850	positive regulation of calcium-mediated signaling	biological_process	10	Cd8a	1	451	3	4090	0.295734
GO:0002456	T cell mediated immunity	biological_process	7	Cd8a	1	451	3	4090	0.295734
GO:0002925	positive regulation of humoral immune response mediated by circulating immunoglobulin	biological_process	12	Fcer2a	1	451	3	4090	0.295734
GO:0003785	actin monomer binding	molecular_function	7	Mtss2	1	451	3	4090	0.295734
GO:0045295	gamma-catenin binding	molecular_function	5	Lef1	1	451	3	4090	0.295734
GO:0004601	peroxidase activity	molecular_function	4	Prdx5	1	451	3	4090	0.295734
GO:0042744	hydrogen peroxide catabolic process	biological_process	8	Prdx5	1	451	3	4090	0.295734
GO:0031124	mRNA 3'-end processing	biological_process	11	Zc3h3	1	451	3	4090	0.295734
GO:0051354	negative regulation of oxidoreductase activity	biological_process	7	Prdx5	1	451	3	4090	0.295734
GO:0014808	release of sequestered calcium ion into cytosol by sarcoplasmic reticulum	biological_process	12	Trdn	1	451	3	4090	0.295734
GO:0031077	post-embryonic camera-type eye development	biological_process	9	Bcl11b	1	451	3	4090	0.295734
GO:0002548	monocyte chemotaxis	biological_process	6	Ccr2	1	451	3	4090	0.295734
GO:0060179	male mating behavior	biological_process	6	Grn	1	451	3	4090	0.295734
GO:0004745	retinol dehydrogenase activity	molecular_function	7	Dhrs9	1	451	3	4090	0.295734
GO:1904491	protein localization to ciliary transition zone	biological_process	9	Cplane1	1	451	3	4090	0.295734
GO:0007042	lysosomal lumen acidification	biological_process	14	Grn	1	451	3	4090	0.295734
GO:1902751	positive regulation of cell cycle G2/M phase transition	biological_process	10	Cdc25a	1	451	3	4090	0.295734
GO:0004935	adrenergic receptor activity	molecular_function	8	Adra1a	1	451	3	4090	0.295734
GO:0003009	skeletal muscle contraction	biological_process	8	Tcap	1	451	3	4090	0.295734
GO:0042379	chemokine receptor binding	molecular_function	7	Cxcl16	1	451	3	4090	0.295734
GO:0016811	hydrolase activity, acting on carbon-nitrogen (but not peptide) bonds, in linear amides	molecular_function	6	Pigl	1	451	3	4090	0.295734
GO:2001032	regulation of double-strand break repair via nonhomologous end joining	biological_process	11	Dek	1	451	3	4090	0.295734
GO:0060033	anatomical structure regression	biological_process	4	Lef1	1	451	3	4090	0.295734
GO:0071548	response to dexamethasone	biological_process	6	Ptafr	1	451	3	4090	0.295734
GO:0005168	neurotrophin TRKA receptor binding	molecular_function	9	Shc1	1	451	3	4090	0.295734
GO:0034773	histone H4-K20 trimethylation	biological_process	13	Kmt5b	1	451	3	4090	0.295734
GO:0150093	amyloid-beta clearance by transcytosis	biological_process	8	Lrp1	1	451	3	4090	0.295734
GO:0047499	calcium-independent phospholipase A2 activity	molecular_function	9	Pla2g6	1	451	3	4090	0.295734
GO:1901844	regulation of cell communication by electrical coupling involved in cardiac conduction	biological_process	8	Hrc	1	451	3	4090	0.295734
GO:0044849	estrous cycle	biological_process	5	Has2	1	451	3	4090	0.295734
GO:0051926	negative regulation of calcium ion transport	biological_process	9	Pln	1	451	3	4090	0.295734
GO:0002606	positive regulation of dendritic cell antigen processing and presentation	biological_process	8	Nod1	1	451	3	4090	0.295734
GO:0008381	mechanosensitive ion channel activity	molecular_function	8	Tmc5	1	451	3	4090	0.295734
GO:0051146	striated muscle cell differentiation	biological_process	7	Bves	1	451	3	4090	0.295734
GO:0048246	macrophage chemotaxis	biological_process	6	Gpr35	1	451	3	4090	0.295734
GO:0001727	lipid kinase activity	molecular_function	7	Sphk2	1	451	3	4090	0.295734
GO:0017119	Golgi transport complex	cellular_component	7	Dnajc28	1	451	3	4090	0.295734
GO:0006027	glycosaminoglycan catabolic process	biological_process	8	Lyve1	1	451	3	4090	0.295734
GO:0003143	embryonic heart tube morphogenesis	biological_process	6	Mesp1	1	451	3	4090	0.295734
GO:0048387	negative regulation of retinoic acid receptor signaling pathway	biological_process	9	Cnot1	1	451	3	4090	0.295734
GO:0010529	negative regulation of transposition	biological_process	7	Aicda	1	451	3	4090	0.295734
GO:0015175	neutral amino acid transmembrane transporter activity	molecular_function	8	Slc36a1	1	451	3	4090	0.295734
GO:0034618	arginine binding	molecular_function	8	Padi4	1	451	3	4090	0.295734
GO:0021943	formation of radial glial scaffolds	biological_process	8	Lef1	1	451	3	4090	0.295734
GO:1904845	cellular response to L-glutamine	biological_process	9	Cyba	1	451	3	4090	0.295734
GO:0031674	I band	cellular_component	5	Tcap	1	451	3	4090	0.295734
GO:0032053	ciliary basal body organization	biological_process	6	Jhy	1	451	3	4090	0.295734
GO:0009116	nucleoside metabolic process	biological_process	8	Uckl1	1	451	3	4090	0.295734
GO:0060700	regulation of ribonuclease activity	biological_process	9	Oasl2	1	451	3	4090	0.295734
GO:0002675	positive regulation of acute inflammatory response	biological_process	10	C2cd4a	1	451	3	4090	0.295734
GO:0051280	negative regulation of release of sequestered calcium ion into cytosol	biological_process	8	Trdn	1	451	3	4090	0.295734
GO:0046790	virion binding	molecular_function	4	Nectin1	1	451	3	4090	0.295734
GO:0060307	regulation of ventricular cardiac muscle cell membrane repolarization	biological_process	11	Kcne3	1	451	3	4090	0.295734
GO:0050884	neuromuscular process controlling posture	biological_process	7	Cln8	1	451	3	4090	0.295734
GO:0008195	phosphatidate phosphatase activity	molecular_function	8	Lpin3	1	451	3	4090	0.295734
GO:0005955	calcineurin complex	cellular_component	5	Ppp3cb	1	451	3	4090	0.295734
GO:0071372	cellular response to follicle-stimulating hormone stimulus	biological_process	8	Gclc	1	451	3	4090	0.295734
GO:0019104	DNA N-glycosylase activity	molecular_function	7	Neil2	1	451	3	4090	0.295734
GO:1904141	positive regulation of microglial cell migration	biological_process	12	P2ry12	1	451	3	4090	0.295734
GO:0048029	monosaccharide binding	molecular_function	5	Siglece	1	451	3	4090	0.295734
GO:0034983	peptidyl-lysine deacetylation	biological_process	11	Hdac9	1	451	3	4090	0.295734
GO:0006120	mitochondrial electron transport, NADH to ubiquinone	biological_process	8	mt-Nd4	1	451	3	4090	0.295734
GO:0004653	polypeptide N-acetylgalactosaminyltransferase activity	molecular_function	8	Galnt5	1	451	3	4090	0.295734
GO:0005858	axonemal dynein complex	cellular_component	6	Dnhd1	1	451	3	4090	0.295734
GO:0010838	positive regulation of keratinocyte proliferation	biological_process	9	Has2	1	451	3	4090	0.295734
GO:0030867	rough endoplasmic reticulum membrane	cellular_component	6	Uba1	1	451	3	4090	0.295734
GO:0035518	histone H2A monoubiquitination	biological_process	14	Bcor	1	451	3	4090	0.295734
GO:0055003	cardiac myofibril assembly	biological_process	8	Tcap	1	451	3	4090	0.295734
GO:0097197	tetraspanin-enriched microdomain	cellular_component	5	Samhd1	1	451	3	4090	0.295734
GO:0008206	bile acid metabolic process	biological_process	7	Atp8b1	1	451	3	4090	0.295734
GO:0032502	developmental process	biological_process	3	Msc	1	451	3	4090	0.295734
GO:0010032	meiotic chromosome condensation	biological_process	10	Incenp	1	451	3	4090	0.295734
GO:0010831	positive regulation of myotube differentiation	biological_process	10	Maml1	1	451	3	4090	0.295734
GO:0051492	regulation of stress fiber assembly	biological_process	7	Alms1	1	451	3	4090	0.295734
GO:0070129	regulation of mitochondrial translation	biological_process	10	Tsfm	1	451	3	4090	0.295734
GO:2000617	positive regulation of histone H3-K9 acetylation	biological_process	12	Sphk2	1	451	3	4090	0.295734
GO:0050881	musculoskeletal movement	biological_process	5	Cln8	1	451	3	4090	0.295734
GO:0050665	hydrogen peroxide biosynthetic process	biological_process	8	Cyba	1	451	3	4090	0.295734
GO:1900025	negative regulation of substrate adhesion-dependent cell spreading	biological_process	10	Postn	1	451	3	4090	0.295734
GO:1901491	negative regulation of lymphangiogenesis	biological_process	8	Foxc1	1	451	3	4090	0.295734
GO:0048790	maintenance of presynaptic active zone structure	biological_process	7	Pclo	1	451	3	4090	0.295734
GO:0032714	negative regulation of interleukin-5 production	biological_process	8	Lef1	1	451	3	4090	0.295734
GO:0072672	neutrophil extravasation	biological_process	6	Trem1	1	451	3	4090	0.295734
GO:0001709	cell fate determination	biological_process	5	Prox1	1	451	3	4090	0.295734
GO:1990825	sequence-specific mRNA binding	molecular_function	8	Dhfr	1	451	3	4090	0.295734
GO:0071318	cellular response to ATP	biological_process	9	P2ry12	1	451	3	4090	0.295734
GO:0051222	positive regulation of protein transport	biological_process	7	Lrp1	1	451	3	4090	0.295734
GO:0008347	glial cell migration	biological_process	7	P2ry12	1	451	3	4090	0.295734
GO:0071281	cellular response to iron ion	biological_process	8	Tfap2a	1	451	3	4090	0.295734
GO:0035973	aggrephagy	biological_process	9	Sqstm1	1	451	3	4090	0.295734
GO:0038084	vascular endothelial growth factor signaling pathway	biological_process	8	Foxc1	1	451	3	4090	0.295734
GO:0070257	positive regulation of mucus secretion	biological_process	9	Cyba	1	451	3	4090	0.295734
GO:0050920	regulation of chemotaxis	biological_process	7	P2ry12	1	451	3	4090	0.295734
GO:0046641	positive regulation of alpha-beta T cell proliferation	biological_process	12	Ccr2	1	451	3	4090	0.295734
GO:0048010	vascular endothelial growth factor receptor signaling pathway	biological_process	8	Foxc1	1	451	3	4090	0.295734
GO:1903979	negative regulation of microglial cell activation	biological_process	9	Grn	1	451	3	4090	0.295734
GO:0042157	lipoprotein metabolic process	biological_process	7	Lrp1	1	451	3	4090	0.295734
GO:0031290	retinal ganglion cell axon guidance	biological_process	7	Alcam	1	451	3	4090	0.295734
GO:0043932	ossification involved in bone remodeling	biological_process	5	Gdf5	1	451	3	4090	0.295734
GO:0048643	positive regulation of skeletal muscle tissue development	biological_process	10	Mef2c	1	451	3	4090	0.295734
GO:0010826	negative regulation of centrosome duplication	biological_process	10	Kifc1	1	451	3	4090	0.295734
GO:0021895	cerebral cortex neuron differentiation	biological_process	8	Zfp335	1	451	3	4090	0.295734
GO:0120020	intermembrane cholesterol transfer activity	molecular_function	7	Gramd1b	1	451	3	4090	0.295734
GO:0032206	positive regulation of telomere maintenance	biological_process	10	Rtel1	1	451	3	4090	0.295734
GO:0016528	sarcoplasm	cellular_component	6	Mef2c	1	451	3	4090	0.295734
GO:0016202	regulation of striated muscle tissue development	biological_process	8	Cenpf	1	451	3	4090	0.295734
GO:0060316	positive regulation of ryanodine-sensitive calcium-release channel activity	biological_process	11	Trdn	1	451	3	4090	0.295734
GO:0034454	microtubule anchoring at centrosome	biological_process	10	Ninl	1	451	3	4090	0.295734
GO:0019395	fatty acid oxidation	biological_process	10	Adipoq	1	451	3	4090	0.295734
GO:0035871	protein K11-linked deubiquitination	biological_process	10	Vcpip1	1	451	3	4090	0.295734
GO:0031985	Golgi cisterna	cellular_component	7	Stx16	1	451	3	4090	0.295734
GO:2000653	regulation of genetic imprinting	biological_process	8	Zfp57	1	451	3	4090	0.295734
GO:0006465	signal peptide processing	biological_process	8	Arxes1	1	451	3	4090	0.295734
GO:0046703	natural killer cell lectin-like receptor binding	molecular_function	6	Ulbp1	1	451	3	4090	0.295734
GO:0035925	mRNA 3'-UTR AU-rich region binding	molecular_function	9	Hnrnpd	1	451	3	4090	0.295734
GO:0031214	biomineral tissue development	biological_process	6	Spp1	1	451	3	4090	0.295734
GO:0019934	cGMP-mediated signaling	biological_process	8	Htr2b	1	451	3	4090	0.295734
GO:0006820	anion transport	biological_process	7	Kcnn4	1	451	3	4090	0.295734
GO:0016175	superoxide-generating NADPH oxidase activity	molecular_function	7	Cyba	1	451	3	4090	0.295734
GO:0072540	T-helper 17 cell lineage commitment	biological_process	10	Ly9	1	451	3	4090	0.295734
GO:0060575	intestinal epithelial cell differentiation	biological_process	8	Ptk6	1	451	3	4090	0.295734
GO:0018022	peptidyl-lysine methylation	biological_process	11	Fam173a	1	451	3	4090	0.295734
GO:0032049	cardiolipin biosynthetic process	biological_process	11	Pla2g6	1	451	3	4090	0.295734
GO:0009642	response to light intensity	biological_process	7	mt-Nd3	1	451	3	4090	0.295734
GO:0048011	neurotrophin TRK receptor signaling pathway	biological_process	8	Akt1s1	1	451	3	4090	0.295734
GO:0005092	GDP-dissociation inhibitor activity	molecular_function	7	Gpsm2	1	451	3	4090	0.295734
GO:0045843	negative regulation of striated muscle tissue development	biological_process	9	Lef1	1	451	3	4090	0.295734
GO:0045815	positive regulation of gene expression, epigenetic	biological_process	9	Sphk2	1	451	3	4090	0.295734
GO:0009378	four-way junction helicase activity	molecular_function	11	Recql	1	451	3	4090	0.295734
GO:1901201	regulation of extracellular matrix assembly	biological_process	6	Has2	1	451	3	4090	0.295734
GO:0016080	synaptic vesicle targeting	biological_process	5	Pclo	1	451	3	4090	0.295734
GO:0046655	folic acid metabolic process	biological_process	7	Dhfr	1	451	3	4090	0.295734
GO:0042048	olfactory behavior	biological_process	5	Cfap69	1	451	3	4090	0.295734
GO:0044206	UMP salvage	biological_process	13	Uckl1	1	451	3	4090	0.295734
GO:0051051	negative regulation of transport	biological_process	6	Yrdc	1	451	3	4090	0.295734
GO:0035751	regulation of lysosomal lumen pH	biological_process	13	Gm6377	1	451	3	4090	0.295734
GO:0060253	negative regulation of glial cell proliferation	biological_process	8	Sox11	1	451	3	4090	0.295734
GO:0032564	dATP binding	molecular_function	9	St13	1	451	3	4090	0.295734
GO:0043129	surfactant homeostasis	biological_process	9	Rcn3	1	451	3	4090	0.295734
GO:0043570	maintenance of DNA repeat elements	biological_process	8	Axin2	1	451	3	4090	0.295734
GO:0071875	adrenergic receptor signaling pathway	biological_process	6	Adra1a	1	451	3	4090	0.295734
GO:0098882	structural constituent of presynaptic active zone	molecular_function	6	Pclo	1	451	3	4090	0.295734
GO:1990845	adaptive thermogenesis	biological_process	4	Zbtb7b	1	451	3	4090	0.295734
GO:0071774	response to fibroblast growth factor	biological_process	5	Tnc	1	451	3	4090	0.295734
GO:0003413	chondrocyte differentiation involved in endochondral bone morphogenesis	biological_process	7	Axin2	1	451	3	4090	0.295734
GO:0044754	autolysosome	cellular_component	10	Sqstm1	1	451	3	4090	0.295734
GO:0002265	astrocyte activation involved in immune response	biological_process	6	Grn	1	451	3	4090	0.295734
GO:0005126	cytokine receptor binding	molecular_function	6	Il7	1	451	3	4090	0.295734
GO:0046888	negative regulation of hormone secretion	biological_process	8	Adipoq	1	451	3	4090	0.295734
GO:0004065	arylsulfatase activity	molecular_function	7	Arsg	1	451	3	4090	0.295734
GO:0051593	response to folic acid	biological_process	6	Zfp354a	1	451	3	4090	0.295734
GO:0034472	snRNA 3'-end processing	biological_process	12	Ints5	1	451	3	4090	0.295734
GO:0007221	positive regulation of transcription of Notch receptor target	biological_process	11	Maml1	1	451	3	4090	0.295734
GO:0004683	calmodulin-dependent protein kinase activity	molecular_function	9	Camk4	1	451	3	4090	0.295734
GO:0001542	ovulation from ovarian follicle	biological_process	5	Pgr	1	451	3	4090	0.295734
GO:0032041	NAD-dependent histone deacetylase activity (H3-K14 specific)	molecular_function	9	Hdac9	1	451	3	4090	0.295734
GO:0006402	mRNA catabolic process	biological_process	10	Slfn14	1	451	3	4090	0.295734
GO:0060561	apoptotic process involved in morphogenesis	biological_process	8	Lef1	1	451	3	4090	0.295734
GO:0030500	regulation of bone mineralization	biological_process	7	Omd	1	451	3	4090	0.295734
GO:0010952	positive regulation of peptidase activity	biological_process	10	Rcn3	1	451	3	4090	0.295734
GO:0097151	positive regulation of inhibitory postsynaptic potential	biological_process	9	Unc13b	1	451	3	4090	0.295734
GO:0071225	cellular response to muramyl dipeptide	biological_process	7	Nod1	1	451	3	4090	0.295734
GO:1904778	positive regulation of protein localization to cell cortex	biological_process	8	Gpsm2	1	451	3	4090	0.295734
GO:0042267	natural killer cell mediated cytotoxicity	biological_process	5	Ulbp1	1	451	3	4090	0.295734
GO:0008009	chemokine activity	molecular_function	8	Cxcl16	1	451	3	4090	0.295734
GO:1905832	positive regulation of spindle assembly	biological_process	10	Gpsm2	1	451	3	4090	0.295734
GO:1904428	negative regulation of tubulin deacetylation	biological_process	10	Tppp	1	451	3	4090	0.295734
GO:0070087	chromo shadow domain binding	molecular_function	6	Chaf1a	1	451	3	4090	0.295734
GO:0048642	negative regulation of skeletal muscle tissue development	biological_process	10	Ybx3	1	451	3	4090	0.295734
GO:0005184	neuropeptide hormone activity	molecular_function	8	Qrfp	1	451	3	4090	0.295734
GO:0002467	germinal center formation	biological_process	7	Mef2c	1	451	3	4090	0.295734
GO:0044305	calyx of Held	cellular_component	7	Unc13b	1	451	3	4090	0.295734
GO:0002693	positive regulation of cellular extravasation	biological_process	8	Ptafr	1	451	3	4090	0.295734
GO:0021953	central nervous system neuron differentiation	biological_process	7	Bcl11b	1	451	3	4090	0.295734
GO:0032696	negative regulation of interleukin-13 production	biological_process	8	Lef1	1	451	3	4090	0.295734
GO:0015844	monoamine transport	biological_process	7	Slc29a4	1	451	3	4090	0.295734
GO:0032182	ubiquitin-like protein binding	molecular_function	5	Tes3-ps	1	451	3	4090	0.295734
GO:0006518	peptide metabolic process	biological_process	7	Cpz	1	451	3	4090	0.295734
GO:0002063	chondrocyte development	biological_process	6	Impad1	1	451	3	4090	0.295734
GO:0051572	negative regulation of histone H3-K4 methylation	biological_process	12	Bcor	1	451	3	4090	0.295734
GO:0045047	protein targeting to ER	biological_process	12	Arxes1	1	451	3	4090	0.295734
GO:0031931	TORC1 complex	cellular_component	4	Akt1s1	1	451	3	4090	0.295734
GO:0050862	positive regulation of T cell receptor signaling pathway	biological_process	10	Kcnn4	1	451	3	4090	0.295734
GO:0001522	pseudouridine synthesis	biological_process	10	Rpusd3	1	451	3	4090	0.295734
GO:0004526	ribonuclease P activity	molecular_function	9	Rpp21	1	451	3	4090	0.295734
GO:0005684	U2-type spliceosomal complex	cellular_component	7	Rnf113a1	1	451	3	4090	0.295734
GO:0001915	negative regulation of T cell mediated cytotoxicity	biological_process	8	Ppp3cb	1	451	3	4090	0.295734
GO:2000009	negative regulation of protein localization to cell surface	biological_process	7	Tax1bp3	1	451	3	4090	0.295734
GO:0006308	DNA catabolic process	biological_process	8	Trex1	1	451	3	4090	0.295734
GO:0030057	desmosome	cellular_component	5	Uba1	1	451	3	4090	0.295734
GO:0033558	protein deacetylase activity	molecular_function	6	Hdac9	1	451	3	4090	0.295734
GO:0042500	aspartic endopeptidase activity, intramembrane cleaving	molecular_function	9	Psen2	1	451	3	4090	0.295734
GO:0070402	NADPH binding	molecular_function	6	Dhfr	1	451	3	4090	0.295734
GO:2000439	positive regulation of monocyte extravasation	biological_process	9	Ccr2	1	451	3	4090	0.295734
GO:0019992	diacylglycerol binding	molecular_function	5	Unc13b	1	451	3	4090	0.295734
GO:0051383	kinetochore organization	biological_process	6	Nuf2	1	451	3	4090	0.295734
GO:0007194	negative regulation of adenylate cyclase activity	biological_process	8	Akap5	1	451	3	4090	0.295734
GO:0031045	dense core granule	cellular_component	9	Syt9	1	451	3	4090	0.295734
GO:0016818	hydrolase activity, acting on acid anhydrides, in phosphorus-containing anhydrides	molecular_function	6	Rtel1	1	451	3	4090	0.295734
GO:2001034	positive regulation of double-strand break repair via nonhomologous end joining	biological_process	12	Kmt5b	1	451	3	4090	0.295734
GO:0034137	positive regulation of toll-like receptor 2 signaling pathway	biological_process	10	Cyba	1	451	3	4090	0.295734
GO:0014031	mesenchymal cell development	biological_process	6	Foxc1	1	451	3	4090	0.295734
GO:0000791	euchromatin	cellular_component	7	Uhrf1	1	451	3	4090	0.295734
GO:2000344	positive regulation of acrosome reaction	biological_process	8	Ccdc87	1	451	3	4090	0.295734
GO:0140078	class I DNA-(apurinic or apyrimidinic site) endonuclease activity	molecular_function	6	Neil2	1	451	3	4090	0.295734
GO:0051149	positive regulation of muscle cell differentiation	biological_process	8	Maml1	1	451	3	4090	0.295734
GO:0070295	renal water absorption	biological_process	7	Has2	1	451	3	4090	0.295734
GO:0097427	microtubule bundle	cellular_component	6	Tppp	1	451	3	4090	0.295734
GO:0004698	calcium-dependent protein kinase C activity	molecular_function	10	Prkca	1	451	3	4090	0.295734
GO:0016597	amino acid binding	molecular_function	7	Prodh	1	451	3	4090	0.295734
GO:0006122	mitochondrial electron transport, ubiquinol to cytochrome c	biological_process	8	Cycs	1	451	3	4090	0.295734
GO:0086036	regulation of cardiac muscle cell membrane potential	biological_process	6	Trdn	1	451	3	4090	0.295734
GO:0005742	mitochondrial outer membrane translocase complex	cellular_component	6	Tomm40l	1	451	3	4090	0.295734
GO:0008276	protein methyltransferase activity	molecular_function	7	Carm1	1	451	3	4090	0.295734
GO:0006415	translational termination	biological_process	8	Mtrf1l	1	451	3	4090	0.295734
GO:0034383	low-density lipoprotein particle clearance	biological_process	5	Adipoq	1	451	3	4090	0.295734
GO:0003906	DNA-(apurinic or apyrimidinic site) endonuclease activity	molecular_function	5	Neil2	1	451	3	4090	0.295734
GO:0002381	immunoglobulin production involved in immunoglobulin mediated immune response	biological_process	6	Gapt	1	451	3	4090	0.295734
GO:0000930	gamma-tubulin complex	cellular_component	4	Tubgcp6	1	451	3	4090	0.295734
GO:0003747	translation release factor activity	molecular_function	9	Mtrf1l	1	451	3	4090	0.295734
GO:0051549	positive regulation of keratinocyte migration	biological_process	10	Has2	1	451	3	4090	0.295734
GO:0090158	endoplasmic reticulum membrane organization	biological_process	6	Trdn	1	451	3	4090	0.295734
GO:0043020	NADPH oxidase complex	cellular_component	6	Cyba	1	451	3	4090	0.295734
GO:0030518	intracellular steroid hormone receptor signaling pathway	biological_process	6	Carm1	1	451	3	4090	0.295734
GO:0043457	regulation of cellular respiration	biological_process	8	Trex1	1	451	3	4090	0.295734
GO:0002322	B cell proliferation involved in immune response	biological_process	9	Gapt	1	451	3	4090	0.295734
GO:0007213	G protein-coupled acetylcholine receptor signaling pathway	biological_process	6	Cdk5r1	1	451	3	4090	0.295734
GO:0048012	hepatocyte growth factor receptor signaling pathway	biological_process	8	Stmn1	1	451	3	4090	0.295734
GO:0034204	lipid translocation	biological_process	8	Atp8b1	1	451	3	4090	0.295734
GO:0051001	negative regulation of nitric-oxide synthase activity	biological_process	9	Atp2b4	1	451	3	4090	0.295734
GO:0002320	lymphoid progenitor cell differentiation	biological_process	7	Trex1	1	451	3	4090	0.295734
GO:0046961	proton-transporting ATPase activity, rotational mechanism	molecular_function	10	Atp6v1f	1	451	3	4090	0.295734
GO:0010837	regulation of keratinocyte proliferation	biological_process	8	Bcl11b	1	451	3	4090	0.295734
GO:0070528	protein kinase C signaling	biological_process	6	Htr2b	1	451	3	4090	0.295734
GO:0021799	cerebral cortex radially oriented cell migration	biological_process	10	Cdk5r1	1	451	3	4090	0.295734
GO:0050693	LBD domain binding	molecular_function	6	Prox1	1	451	3	4090	0.295734
GO:0070207	protein homotrimerization	biological_process	9	Scara5	1	451	3	4090	0.295734
GO:0005779	integral component of peroxisomal membrane	cellular_component	7	Pex11g	1	451	3	4090	0.295734
GO:0030916	otic vesicle formation	biological_process	7	Tcap	1	451	3	4090	0.295734
GO:0004697	protein kinase C activity	molecular_function	9	Prkca	1	451	3	4090	0.295734
GO:0016874	ligase activity	molecular_function	4	Acss3;Uba1;Nars2;Gclc;Mthfs	5	451	33	4090	0.296212
GO:0007088	regulation of mitotic nuclear division	biological_process	8	Obsl1;Mki67	2	451	10	4090	0.303835
GO:0000407	phagophore assembly site	cellular_component	6	Wipi1;Sqstm1	2	451	10	4090	0.303835
GO:0000793	condensed chromosome	cellular_component	7	Incenp;Mki67	2	451	10	4090	0.303835
GO:1900273	positive regulation of long-term synaptic potentiation	biological_process	9	Sqstm1;Akap5	2	451	10	4090	0.303835
GO:0030593	neutrophil chemotaxis	biological_process	7	Trem1;Spp1	2	451	10	4090	0.303835
GO:0048786	presynaptic active zone	cellular_component	4	Pclo;Unc13b	2	451	10	4090	0.303835
GO:0051480	regulation of cytosolic calcium ion concentration	biological_process	12	Hrc;Atp2b4	2	451	10	4090	0.303835
GO:0030513	positive regulation of BMP signaling pathway	biological_process	11	Gdf5;Sox11	2	451	10	4090	0.303835
GO:0070491	repressing transcription factor binding	molecular_function	7	Hdac9;Pgr	2	451	10	4090	0.303835
GO:0048706	embryonic skeletal system development	biological_process	7	Fgf9;Pcgf2	2	451	10	4090	0.303835
GO:0046686	response to cadmium ion	biological_process	7	Gclc;Sord	2	451	10	4090	0.303835
GO:0048593	camera-type eye morphogenesis	biological_process	8	Nectin1;Gdf11	2	451	10	4090	0.303835
GO:0001816	cytokine production	biological_process	4	Irak4;Ptafr	2	451	10	4090	0.303835
GO:0030030	cell projection organization	biological_process	5	Cplane1;Armc9;Jhy;Tubb4a;Myo1a;Rp1;P2ry12	7	451	50	4090	0.31067
GO:0045202	synapse	cellular_component	3	Rpsa;Hrh1;Mycbpap;Syt13;Akap5;Arc;Htr2b;Snph;Obsl1;Lzts1;Syt10;Tppp;Unc13b;Insyn1;Ppp3cb;Pclo;Dpysl3;Nectin1;Cttnbp2;Syngr1;Syt9	21	451	169	4090	0.311777
GO:0060395	SMAD protein signal transduction	biological_process	5	Inha;Gdf5;Gdf11	3	451	18	4090	0.318584
GO:0008286	insulin receptor signaling pathway	biological_process	8	Brwd1;Foxo6;Shc1	3	451	18	4090	0.318584
GO:0030315	T-tubule	cellular_component	5	Adra1a;Atp2b4;Ppp3cb	3	451	18	4090	0.318584
GO:0001669	acrosomal vesicle	cellular_component	9	Txndc8;Tssk1;Arc	3	451	18	4090	0.318584
GO:0035690	cellular response to drug	biological_process	6	Mef2c;Ppp3cb;Adipoq	3	451	18	4090	0.318584
GO:0008144	drug binding	molecular_function	4	Htr2b;Ppp3cb;Dhfr	3	451	18	4090	0.318584
GO:0070507	regulation of microtubule cytoskeleton organization	biological_process	7	Cdk2ap2;Cdk5r1;Tppp	3	451	18	4090	0.318584
GO:0045599	negative regulation of fat cell differentiation	biological_process	8	Adipoq;Zadh2;Asxl1	3	451	18	4090	0.318584
GO:0005777	peroxisome	cellular_component	7	Acox3;Fndc5;Prdx5;Pex11g;Zadh2	5	451	34	4090	0.318816
GO:0043154	negative regulation of cysteine-type endopeptidase activity involved in apoptotic process	biological_process	10	Ifi202b;Naip2;Lef1;Prdx5	4	451	26	4090	0.320761
GO:0071277	cellular response to calcium ion	biological_process	8	Syt9;Syt10;Syt13;Mef2c	4	451	26	4090	0.320761
GO:0043231	intracellular membrane-bounded organelle	cellular_component	5	Fyco1;Serpina1b;Smarcd1;Maml1;Gdf11;Sqstm1;Tax1bp3;Lamtor4;Mef2c;Atp2b4;Neil2;Ambra1;Frat1;Trdn;Plin4;Stx16;Ddost;F10;Cdk5r1;Slc35f6;Slc29a3;Syt13;Hsd3b7;Ppih;Prdx5;Runx1;Nmrk2;Dhrs9;Nectin1;Sphk2	30	451	249	4090	0.327849
GO:0002250	adaptive immune response	biological_process	5	Clec4a2;Cd8a;Gpr183;Alcam;Ly9;Trex1	6	451	43	4090	0.335516
GO:0000278	mitotic cell cycle	biological_process	5	Vcpip1;Ska2;Tubb4a;Tubgcp6;Cenpf;Cetn4	6	451	43	4090	0.335516
GO:0012505	endomembrane system	cellular_component	4	Rnf128;Rab43;Stx19;Impad1;Rhebl1;Stx16	6	451	43	4090	0.335516
GO:0044325	ion channel binding	molecular_function	5	Trdn;Hrc;Kcne3;Lrrc55;Tcap	5	451	35	4090	0.341618
GO:0001228	DNA-binding transcription activator activity, RNA polymerase II-specific	molecular_function	6	Tfap2a;Mesp1;Foxc1;Bcl11b;Pgr;Zfp523;Mef2c;E2f3;Sox11;Cebpe;Tcf20;Runx1;Bhlha15;Zbtb7b;Lef1	15	451	120	4090	0.342421
GO:0043029	T cell homeostasis	biological_process	6	Gpr174;Ppp3cb	2	451	11	4090	0.346377
GO:0000132	establishment of mitotic spindle orientation	biological_process	10	Gpsm2;Spry1	2	451	11	4090	0.346377
GO:0050775	positive regulation of dendrite morphogenesis	biological_process	10	Akap5;Obsl1	2	451	11	4090	0.346377
GO:0045880	positive regulation of smoothened signaling pathway	biological_process	9	Armc9;Fgf9	2	451	11	4090	0.346377
GO:0030317	flagellated sperm motility	biological_process	5	Sord;Atp2b4	2	451	11	4090	0.346377
GO:0046875	ephrin receptor binding	molecular_function	6	Shc1;Cdk5r1	2	451	11	4090	0.346377
GO:0070830	bicellular tight junction assembly	biological_process	9	Cldn24;Cldn4	2	451	11	4090	0.346377
GO:0061001	regulation of dendritic spine morphogenesis	biological_process	10	Cdk5r1;Arc	2	451	11	4090	0.346377
GO:0005158	insulin receptor binding	molecular_function	6	Shc1;Brwd1	2	451	11	4090	0.346377
GO:0008219	cell death	biological_process	4	Emp3;Axin2	2	451	11	4090	0.346377
GO:0016032	viral process	biological_process	6	Nectin1;Zbp1	2	451	11	4090	0.346377
GO:0071345	cellular response to cytokine stimulus	biological_process	7	Lef1;Dpysl3	2	451	11	4090	0.346377
GO:0120163	negative regulation of cold-induced thermogenesis	biological_process	7	Il18r1;Adipoq	2	451	11	4090	0.346377
GO:0010507	negative regulation of autophagy	biological_process	9	Adra1a;Htr2b	2	451	11	4090	0.346377
GO:1990138	neuron projection extension	biological_process	6	Postn;Alcam	2	451	11	4090	0.346377
GO:0007416	synapse assembly	biological_process	6	Obsl1;Pclo	2	451	11	4090	0.346377
GO:0035094	response to nicotine	biological_process	6	Dhfr;mt-Nd4	2	451	11	4090	0.346377
GO:0000228	nuclear chromosome	cellular_component	7	H3c11;H3c8	2	451	11	4090	0.346377
GO:0001917	photoreceptor inner segment	cellular_component	5	Inha;Rp1	2	451	11	4090	0.346377
GO:0031016	pancreas development	biological_process	6	Gdf11;Prox1	2	451	11	4090	0.346377
GO:0046658	anchored component of plasma membrane	cellular_component	6	Ulbp1;Nod1	2	451	11	4090	0.346377
GO:0008013	beta-catenin binding	molecular_function	5	Lef1;Axin2;Tax1bp3;Sall1	4	451	27	4090	0.347005
GO:0020037	heme binding	molecular_function	6	Rp1;Cyba;Cycs	3	451	19	4090	0.35029
GO:0007519	skeletal muscle tissue development	biological_process	8	Bves;Msc;Mef2c	3	451	19	4090	0.35029
GO:0010718	positive regulation of epithelial to mesenchymal transition	biological_process	8	Lef1;Axin2;Foxc1	3	451	19	4090	0.35029
GO:0032760	positive regulation of tumor necrosis factor production	biological_process	9	Cyba;Nod1;Ptafr	3	451	19	4090	0.35029
GO:0007601	visual perception	biological_process	8	Opa3;Rp1;Cln8	3	451	19	4090	0.35029
GO:0000045	autophagosome assembly	biological_process	7	Ambra1;Wipi1;Rab43	3	451	19	4090	0.35029
GO:0043525	positive regulation of neuron apoptotic process	biological_process	10	Grn;Tfap2a;Cdk5r1	3	451	19	4090	0.35029
GO:0031122	cytoplasmic microtubule organization	biological_process	8	Trdn;Ccdc88b;Tubgcp6	3	451	19	4090	0.35029
GO:0010951	negative regulation of endopeptidase activity	biological_process	11	Wfdc17;Serpina1b;Serpina10	3	451	19	4090	0.35029
GO:0048167	regulation of synaptic plasticity	biological_process	9	Hrh1;Lzts1;Mef2c	3	451	19	4090	0.35029
GO:0016324	apical plasma membrane	cellular_component	5	Atp8b1;Myo1a;Lzts1;Cyba;Cldn4;Pappa2;Kcnn4;Nod1;Cldn24;Rapgef6;Slc29a4	11	451	87	4090	0.362316
GO:0030182	neuron differentiation	biological_process	6	Cdk5r1;Shc1;Snph;Sox11;Mef2c	5	451	36	4090	0.36453
GO:0051607	defense response to virus	biological_process	5	Cd8a;Trex1;Zbp1;Oasl2;Samhd1;Aicda;Cnot7	7	451	53	4090	0.366711
GO:0005765	lysosomal membrane	cellular_component	9	Uba1;Slc35f6;Tmem74;Slc29a3;Sphk2;Slc36a1;Grn	7	451	53	4090	0.366711
GO:0071356	cellular response to tumor necrosis factor	biological_process	8	Has2;Postn;Ybx3;Cyba	4	451	28	4090	0.373282
GO:0000127	transcription factor TFIIIC complex	cellular_component	7	Gtf3c3	1	451	4	4090	0.37345
GO:0039706	co-receptor binding	molecular_function	5	Dkk2	1	451	4	4090	0.37345
GO:0072383	plus-end-directed vesicle transport along microtubule	biological_process	11	Fyco1	1	451	4	4090	0.37345
GO:0016075	rRNA catabolic process	biological_process	11	Slfn14	1	451	4	4090	0.37345
GO:0042310	vasoconstriction	biological_process	10	Htr2b	1	451	4	4090	0.37345
GO:0048539	bone marrow development	biological_process	6	Asxl1	1	451	4	4090	0.37345
GO:0032230	positive regulation of synaptic transmission, GABAergic	biological_process	10	Adra1a	1	451	4	4090	0.37345
GO:0050811	GABA receptor binding	molecular_function	6	Akap5	1	451	4	4090	0.37345
GO:0006790	sulfur compound metabolic process	biological_process	5	Arsg	1	451	4	4090	0.37345
GO:0032480	negative regulation of type I interferon production	biological_process	8	Nmi	1	451	4	4090	0.37345
GO:0019068	virion assembly	biological_process	7	Rab43	1	451	4	4090	0.37345
GO:0030131	clathrin adaptor complex	cellular_component	7	Lrrn3	1	451	4	4090	0.37345
GO:1904385	cellular response to angiotensin	biological_process	8	Cyba	1	451	4	4090	0.37345
GO:0010385	double-stranded methylated DNA binding	molecular_function	8	Zfp57	1	451	4	4090	0.37345
GO:0002221	pattern recognition receptor signaling pathway	biological_process	7	Nod1	1	451	4	4090	0.37345
GO:0008484	sulfuric ester hydrolase activity	molecular_function	6	Arsg	1	451	4	4090	0.37345
GO:0044267	cellular protein metabolic process	biological_process	7	Cln8	1	451	4	4090	0.37345
GO:0045109	intermediate filament organization	biological_process	8	Tchh	1	451	4	4090	0.37345
GO:0045730	respiratory burst	biological_process	4	Cyba	1	451	4	4090	0.37345
GO:0045806	negative regulation of endocytosis	biological_process	8	Snph	1	451	4	4090	0.37345
GO:0000028	ribosomal small subunit assembly	biological_process	9	Rpsa	1	451	4	4090	0.37345
GO:0006693	prostaglandin metabolic process	biological_process	10	Zadh2	1	451	4	4090	0.37345
GO:0005319	lipid transporter activity	molecular_function	4	Atp8b1	1	451	4	4090	0.37345
GO:0005522	profilin binding	molecular_function	5	Pclo	1	451	4	4090	0.37345
GO:0023014	signal transduction by protein phosphorylation	biological_process	10	Taok3	1	451	4	4090	0.37345
GO:0060710	chorio-allantoic fusion	biological_process	4	Lef1	1	451	4	4090	0.37345
GO:0051011	microtubule minus-end binding	molecular_function	8	Tubgcp6	1	451	4	4090	0.37345
GO:0045823	positive regulation of heart contraction	biological_process	9	Hrc	1	451	4	4090	0.37345
GO:0001953	negative regulation of cell-matrix adhesion	biological_process	8	Postn	1	451	4	4090	0.37345
GO:0099059	integral component of presynaptic active zone membrane	cellular_component	7	Atp2b4	1	451	4	4090	0.37345
GO:0006940	regulation of smooth muscle contraction	biological_process	9	Shc1	1	451	4	4090	0.37345
GO:0032288	myelin assembly	biological_process	7	Tppp	1	451	4	4090	0.37345
GO:0030042	actin filament depolymerization	biological_process	8	Mical3	1	451	4	4090	0.37345
GO:0060047	heart contraction	biological_process	7	Trdn	1	451	4	4090	0.37345
GO:0009651	response to salt stress	biological_process	6	Pappa2	1	451	4	4090	0.37345
GO:0034115	negative regulation of heterotypic cell-cell adhesion	biological_process	8	Adipoq	1	451	4	4090	0.37345
GO:0045743	positive regulation of fibroblast growth factor receptor signaling pathway	biological_process	9	Fgfbp3	1	451	4	4090	0.37345
GO:0042554	superoxide anion generation	biological_process	7	Cyba	1	451	4	4090	0.37345
GO:0035770	ribonucleoprotein granule	cellular_component	6	Hnrnpa3	1	451	4	4090	0.37345
GO:0030695	GTPase regulator activity	molecular_function	6	Gpsm2	1	451	4	4090	0.37345
GO:0035988	chondrocyte proliferation	biological_process	4	Grn	1	451	4	4090	0.37345
GO:0070411	I-SMAD binding	molecular_function	6	Axin2	1	451	4	4090	0.37345
GO:0031005	filamin binding	molecular_function	6	Dpysl3	1	451	4	4090	0.37345
GO:0031432	titin binding	molecular_function	6	Tcap	1	451	4	4090	0.37345
GO:0003214	cardiac left ventricle morphogenesis	biological_process	7	Fgf9	1	451	4	4090	0.37345
GO:0018023	peptidyl-lysine trimethylation	biological_process	12	Fam173a	1	451	4	4090	0.37345
GO:0051279	regulation of release of sequestered calcium ion into cytosol	biological_process	7	Cyba	1	451	4	4090	0.37345
GO:0032008	positive regulation of TOR signaling	biological_process	10	Lamtor4	1	451	4	4090	0.37345
GO:0003015	heart process	biological_process	6	Trex1	1	451	4	4090	0.37345
GO:0005614	interstitial matrix	cellular_component	6	Tnc	1	451	4	4090	0.37345
GO:0021707	cerebellar granule cell differentiation	biological_process	7	Prox1	1	451	4	4090	0.37345
GO:0005243	gap junction channel activity	molecular_function	8	Panx2	1	451	4	4090	0.37345
GO:0000780	condensed nuclear chromosome, centromeric region	cellular_component	9	Kmt5b	1	451	4	4090	0.37345
GO:0035999	tetrahydrofolate interconversion	biological_process	6	Mthfs	1	451	4	4090	0.37345
GO:0043254	regulation of protein complex assembly	biological_process	6	Bbs10	1	451	4	4090	0.37345
GO:0089718	amino acid import across plasma membrane	biological_process	12	Slc36a1	1	451	4	4090	0.37345
GO:0017166	vinculin binding	molecular_function	6	Sorbs3	1	451	4	4090	0.37345
GO:2000343	positive regulation of chemokine (C-X-C motif) ligand 2 production	biological_process	9	Postn	1	451	4	4090	0.37345
GO:0001682	tRNA 5'-leader removal	biological_process	13	Rpp21	1	451	4	4090	0.37345
GO:0042308	negative regulation of protein import into nucleus	biological_process	10	Mdfic	1	451	4	4090	0.37345
GO:0045132	meiotic chromosome segregation	biological_process	6	Nuf2	1	451	4	4090	0.37345
GO:0035810	positive regulation of urine volume	biological_process	7	Has2	1	451	4	4090	0.37345
GO:0051155	positive regulation of striated muscle cell differentiation	biological_process	9	Mesp1	1	451	4	4090	0.37345
GO:0071459	protein localization to chromosome, centromeric region	biological_process	9	Haspin	1	451	4	4090	0.37345
GO:0042562	hormone binding	molecular_function	4	Pgr	1	451	4	4090	0.37345
GO:0071421	manganese ion transmembrane transport	biological_process	11	Hrh1	1	451	4	4090	0.37345
GO:0055012	ventricular cardiac muscle cell differentiation	biological_process	8	Mef2c	1	451	4	4090	0.37345
GO:0042743	hydrogen peroxide metabolic process	biological_process	7	Cycs	1	451	4	4090	0.37345
GO:0034755	iron ion transmembrane transport	biological_process	11	Scara5	1	451	4	4090	0.37345
GO:0061564	axon development	biological_process	8	Vash2	1	451	4	4090	0.37345
GO:0051315	attachment of mitotic spindle microtubules to kinetochore	biological_process	6	Nuf2	1	451	4	4090	0.37345
GO:0016494	C-X-C chemokine receptor activity	molecular_function	9	Gpr35	1	451	4	4090	0.37345
GO:0007158	neuron cell-cell adhesion	biological_process	6	Cdk5r1	1	451	4	4090	0.37345
GO:0030552	cAMP binding	molecular_function	7	Bves	1	451	4	4090	0.37345
GO:0034364	high-density lipoprotein particle	cellular_component	5	Saa3	1	451	4	4090	0.37345
GO:0032964	collagen biosynthetic process	biological_process	5	Rcn3	1	451	4	4090	0.37345
GO:0030238	male sex determination	biological_process	6	Fgf9	1	451	4	4090	0.37345
GO:0060042	retina morphogenesis in camera-type eye	biological_process	5	Rp1	1	451	4	4090	0.37345
GO:0045869	negative regulation of single stranded viral RNA replication via double stranded DNA intermediate	biological_process	11	Aicda	1	451	4	4090	0.37345
GO:0050847	progesterone receptor signaling pathway	biological_process	7	Pgr	1	451	4	4090	0.37345
GO:0010881	regulation of cardiac muscle contraction by regulation of the release of sequestered calcium ion	biological_process	9	Pln	1	451	4	4090	0.37345
GO:0030050	vesicle transport along actin filament	biological_process	6	Myo1a	1	451	4	4090	0.37345
GO:0036302	atrioventricular canal development	biological_process	5	Has2	1	451	4	4090	0.37345
GO:0001759	organ induction	biological_process	9	Spry1	1	451	4	4090	0.37345
GO:0060080	inhibitory postsynaptic potential	biological_process	7	Insyn1	1	451	4	4090	0.37345
GO:0090330	regulation of platelet aggregation	biological_process	9	Prkca	1	451	4	4090	0.37345
GO:0030667	secretory granule membrane	cellular_component	7	Syt9	1	451	4	4090	0.37345
GO:0006744	ubiquinone biosynthetic process	biological_process	9	Mettl27	1	451	4	4090	0.37345
GO:0071286	cellular response to magnesium ion	biological_process	8	Slfn14	1	451	4	4090	0.37345
GO:2000310	regulation of NMDA receptor activity	biological_process	10	Mef2c	1	451	4	4090	0.37345
GO:0010457	centriole-centriole cohesion	biological_process	5	Cntln	1	451	4	4090	0.37345
GO:0032204	regulation of telomere maintenance	biological_process	9	Hnrnpd	1	451	4	4090	0.37345
GO:0030225	macrophage differentiation	biological_process	8	Cebpe	1	451	4	4090	0.37345
GO:0086005	ventricular cardiac muscle cell action potential	biological_process	9	Kcne3	1	451	4	4090	0.37345
GO:0060979	vasculogenesis involved in coronary vascular morphogenesis	biological_process	7	Fgf9	1	451	4	4090	0.37345
GO:0046914	transition metal ion binding	molecular_function	7	Tchh	1	451	4	4090	0.37345
GO:0010804	negative regulation of tumor necrosis factor-mediated signaling pathway	biological_process	10	Adipoq	1	451	4	4090	0.37345
GO:0048667	cell morphogenesis involved in neuron differentiation	biological_process	8	Mef2c	1	451	4	4090	0.37345
GO:0051287	NAD binding	molecular_function	6	Sord	1	451	4	4090	0.37345
GO:0008354	germ cell migration	biological_process	7	Foxc1	1	451	4	4090	0.37345
GO:2000651	positive regulation of sodium ion transmembrane transporter activity	biological_process	8	Wnk2	1	451	4	4090	0.37345
GO:1901098	positive regulation of autophagosome maturation	biological_process	9	Fyco1	1	451	4	4090	0.37345
GO:0060452	positive regulation of cardiac muscle contraction	biological_process	10	Adra1a	1	451	4	4090	0.37345
GO:0032050	clathrin heavy chain binding	molecular_function	6	Lrp1	1	451	4	4090	0.37345
GO:0004029	aldehyde dehydrogenase (NAD) activity	molecular_function	7	Aldh4a1	1	451	4	4090	0.37345
GO:0008320	protein transmembrane transporter activity	molecular_function	6	Tomm40l	1	451	4	4090	0.37345
GO:0036353	histone H2A-K119 monoubiquitination	biological_process	15	Pcgf2	1	451	4	4090	0.37345
GO:0045588	positive regulation of gamma-delta T cell differentiation	biological_process	11	Lef1	1	451	4	4090	0.37345
GO:0005104	fibroblast growth factor receptor binding	molecular_function	7	Fgf9	1	451	4	4090	0.37345
GO:0030220	platelet formation	biological_process	7	Mef2c	1	451	4	4090	0.37345
GO:0044794	positive regulation by host of viral process	biological_process	8	Zfp72	1	451	4	4090	0.37345
GO:2001033	negative regulation of double-strand break repair via nonhomologous end joining	biological_process	12	Aunip	1	451	4	4090	0.37345
GO:0001225	RNA polymerase II transcription coactivator binding	molecular_function	8	Pgr	1	451	4	4090	0.37345
GO:0031683	G-protein beta/gamma-subunit complex binding	molecular_function	5	Cetn4	1	451	4	4090	0.37345
GO:0045595	regulation of cell differentiation	biological_process	6	Tfap2a	1	451	4	4090	0.37345
GO:0000288	nuclear-transcribed mRNA catabolic process, deadenylation-dependent decay	biological_process	12	Cnot1	1	451	4	4090	0.37345
GO:0000795	synaptonemal complex	cellular_component	8	Incenp	1	451	4	4090	0.37345
GO:0040029	regulation of gene expression, epigenetic	biological_process	8	Zfp335	1	451	4	4090	0.37345
GO:0014902	myotube differentiation	biological_process	8	Mef2c	1	451	4	4090	0.37345
GO:0032640	tumor necrosis factor production	biological_process	6	Wdr83	1	451	4	4090	0.37345
GO:0060998	regulation of dendritic spine development	biological_process	12	Mef2c	1	451	4	4090	0.37345
GO:0032780	negative regulation of ATPase activity	biological_process	8	Pln	1	451	4	4090	0.37345
GO:0070309	lens fiber cell morphogenesis	biological_process	8	Prox1	1	451	4	4090	0.37345
GO:0070742	C2H2 zinc finger domain binding	molecular_function	6	Lef1	1	451	4	4090	0.37345
GO:0051661	maintenance of centrosome location	biological_process	7	Gpsm2	1	451	4	4090	0.37345
GO:0045579	positive regulation of B cell differentiation	biological_process	10	Il7	1	451	4	4090	0.37345
GO:0034638	phosphatidylcholine catabolic process	biological_process	10	Pla2g6	1	451	4	4090	0.37345
GO:0043117	positive regulation of vascular permeability	biological_process	8	Fgfbp3	1	451	4	4090	0.37345
GO:0032687	negative regulation of interferon-alpha production	biological_process	9	Nmi	1	451	4	4090	0.37345
GO:0030277	maintenance of gastrointestinal epithelium	biological_process	9	Muc6	1	451	4	4090	0.37345
GO:0023019	signal transduction involved in regulation of gene expression	biological_process	5	Mesp1	1	451	4	4090	0.37345
GO:0032680	regulation of tumor necrosis factor production	biological_process	8	Trex1	1	451	4	4090	0.37345
GO:0022841	potassium ion leak channel activity	molecular_function	9	Kcnk12	1	451	4	4090	0.37345
GO:0016709	oxidoreductase activity, acting on paired donors, with incorporation or reduction of molecular oxygen, NAD(P)H as one donor, and incorporation of one atom of oxygen	molecular_function	6	Mical3	1	451	4	4090	0.37345
GO:0034993	meiotic nuclear membrane microtubule tethering complex	cellular_component	8	Syne1	1	451	4	4090	0.37345
GO:0038024	cargo receptor activity	molecular_function	3	Lrp1	1	451	4	4090	0.37345
GO:0048096	chromatin-mediated maintenance of transcription	biological_process	7	Smarcd1	1	451	4	4090	0.37345
GO:0008406	gonad development	biological_process	6	Sall1	1	451	4	4090	0.37345
GO:0046928	regulation of neurotransmitter secretion	biological_process	6	Mef2c	1	451	4	4090	0.37345
GO:0051604	protein maturation	biological_process	7	Lmf2	1	451	4	4090	0.37345
GO:0030289	protein phosphatase 4 complex	cellular_component	5	Ppp4r3a	1	451	4	4090	0.37345
GO:0030728	ovulation	biological_process	5	Alms1	1	451	4	4090	0.37345
GO:0048485	sympathetic nervous system development	biological_process	6	Sox11	1	451	4	4090	0.37345
GO:0050786	RAGE receptor binding	molecular_function	6	Fpr1	1	451	4	4090	0.37345
GO:0031224	intrinsic component of membrane	cellular_component	4	P2ry12	1	451	4	4090	0.37345
GO:0010459	negative regulation of heart rate	biological_process	10	Pln	1	451	4	4090	0.37345
GO:1901612	cardiolipin binding	molecular_function	7	Atp8b1	1	451	4	4090	0.37345
GO:0035313	wound healing, spreading of epidermal cells	biological_process	8	Arhgap24	1	451	4	4090	0.37345
GO:0048762	mesenchymal cell differentiation	biological_process	6	Foxc1	1	451	4	4090	0.37345
GO:0019229	regulation of vasoconstriction	biological_process	9	Adra1a	1	451	4	4090	0.37345
GO:0044772	mitotic cell cycle phase transition	biological_process	6	Lzts1	1	451	4	4090	0.37345
GO:1904959	regulation of cytochrome-c oxidase activity	biological_process	11	Sphk2	1	451	4	4090	0.37345
GO:0002031	G protein-coupled receptor internalization	biological_process	10	Htr2b	1	451	4	4090	0.37345
GO:0010906	regulation of glucose metabolic process	biological_process	9	Adipoq	1	451	4	4090	0.37345
GO:0031953	negative regulation of protein autophosphorylation	biological_process	11	Adipoq	1	451	4	4090	0.37345
GO:0022627	cytosolic small ribosomal subunit	cellular_component	8	Rpsa	1	451	4	4090	0.37345
GO:0042392	sphingosine-1-phosphate phosphatase activity	molecular_function	8	Plpp7	1	451	4	4090	0.37345
GO:0016572	histone phosphorylation	biological_process	10	Incenp	1	451	4	4090	0.37345
GO:0034707	chloride channel complex	cellular_component	7	Cldn4	1	451	4	4090	0.37345
GO:0002281	macrophage activation involved in immune response	biological_process	8	Trex1	1	451	4	4090	0.37345
GO:0050863	regulation of T cell activation	biological_process	8	Trex1	1	451	4	4090	0.37345
GO:0070166	enamel mineralization	biological_process	8	Nectin1	1	451	4	4090	0.37345
GO:0019432	triglyceride biosynthetic process	biological_process	10	Lpin3	1	451	4	4090	0.37345
GO:0021819	layer formation in cerebral cortex	biological_process	5	Cdk5r1	1	451	4	4090	0.37345
GO:0071287	cellular response to manganese ion	biological_process	8	Slfn14	1	451	4	4090	0.37345
GO:0048193	Golgi vesicle transport	biological_process	7	Ccdc91	1	451	4	4090	0.37345
GO:2000648	positive regulation of stem cell proliferation	biological_process	8	Sox11	1	451	4	4090	0.37345
GO:1905274	regulation of modification of postsynaptic actin cytoskeleton	biological_process	10	Cttnbp2	1	451	4	4090	0.37345
GO:0000800	lateral element	cellular_component	7	Incenp	1	451	4	4090	0.37345
GO:0051491	positive regulation of filopodium assembly	biological_process	11	Dpysl3	1	451	4	4090	0.37345
GO:0090160	Golgi to lysosome transport	biological_process	10	Ccdc91	1	451	4	4090	0.37345
GO:2000969	positive regulation of AMPA receptor activity	biological_process	10	Arc	1	451	4	4090	0.37345
GO:0140326	ATPase-coupled intramembrane lipid transporter activity	molecular_function	5	Atp8b1	1	451	4	4090	0.37345
GO:0031098	stress-activated protein kinase signaling cascade	biological_process	6	Taok3	1	451	4	4090	0.37345
GO:0046512	sphingosine biosynthetic process	biological_process	9	Sphk2	1	451	4	4090	0.37345
GO:0009967	positive regulation of signal transduction	biological_process	8	Adipoq	1	451	4	4090	0.37345
GO:0009792	embryo development ending in birth or egg hatching	biological_process	6	Cdk5r1	1	451	4	4090	0.37345
GO:0035067	negative regulation of histone acetylation	biological_process	11	Msx3	1	451	4	4090	0.37345
GO:0061462	protein localization to lysosome	biological_process	9	Lamtor4	1	451	4	4090	0.37345
GO:0051984	positive regulation of chromosome segregation	biological_process	7	Rad18	1	451	4	4090	0.37345
GO:0010738	regulation of protein kinase A signaling	biological_process	9	Akap5	1	451	4	4090	0.37345
GO:0061158	3'-UTR-mediated mRNA destabilization	biological_process	12	Hnrnpd	1	451	4	4090	0.37345
GO:0060563	neuroepithelial cell differentiation	biological_process	8	Sox11	1	451	4	4090	0.37345
GO:0005041	low-density lipoprotein particle receptor activity	molecular_function	5	Cxcl16	1	451	4	4090	0.37345
GO:0098688	parallel fiber to Purkinje cell synapse	cellular_component	5	Pclo	1	451	4	4090	0.37345
GO:0016180	snRNA processing	biological_process	11	Ints5	1	451	4	4090	0.37345
GO:0060122	inner ear receptor cell stereocilium organization	biological_process	8	Alms1	1	451	4	4090	0.37345
GO:0033314	mitotic DNA replication checkpoint	biological_process	7	Clspn	1	451	4	4090	0.37345
GO:0140268	endoplasmic reticulum-plasma membrane contact site	cellular_component	5	Gramd1b	1	451	4	4090	0.37345
GO:1901387	positive regulation of voltage-gated calcium channel activity	biological_process	9	Kcne3	1	451	4	4090	0.37345
GO:0031982	vesicle	cellular_component	5	Kcnn4;Pln;Myo1a;Kcne3;Spp1;Grn	6	451	45	4090	0.376634
GO:0043198	dendritic shaft	cellular_component	5	Lzts1;Nsf;Akap5	3	451	20	4090	0.381826
GO:0042752	regulation of circadian rhythm	biological_process	5	Prox1;Hnrnpd;Usp9x	3	451	20	4090	0.381826
GO:0097110	scaffold protein binding	molecular_function	5	Atp2b4;Trem1;Akap5	3	451	20	4090	0.381826
GO:0005244	voltage-gated ion channel activity	molecular_function	9	Kcne3;Kcng1;Kcnk12	3	451	20	4090	0.381826
GO:0004222	metalloendopeptidase activity	molecular_function	8	Pappa2;Gm49333;Adam6b	3	451	20	4090	0.381826
GO:0042632	cholesterol homeostasis	biological_process	9	Gramd1b;Hdac9;Alms1	3	451	20	4090	0.381826
GO:0045171	intercellular bridge	cellular_component	4	Ngrn;Mical3;Ninl	3	451	20	4090	0.381826
GO:0008134	transcription factor binding	molecular_function	5	Bcor;Hnrnpd;Cnot7;Lef1;Cenpf;E2f3;Ifi213;Hdac9;Mef2c;Sorbs3;Mdfic;Foxo6;Foxc1	13	451	106	4090	0.385514
GO:0071320	cellular response to cAMP	biological_process	9	Adipoq;Ptafr	2	451	12	4090	0.388022
GO:0044344	cellular response to fibroblast growth factor stimulus	biological_process	8	Postn;Gclc	2	451	12	4090	0.388022
GO:0003707	steroid hormone receptor activity	molecular_function	5	Pgr;Paqr7	2	451	12	4090	0.388022
GO:0060999	positive regulation of dendritic spine development	biological_process	13	Grn;Foxo6	2	451	12	4090	0.388022
GO:0019216	regulation of lipid metabolic process	biological_process	7	Opa3;Bcl11b	2	451	12	4090	0.388022
GO:0055007	cardiac muscle cell differentiation	biological_process	7	Mef2c;Mesp1	2	451	12	4090	0.388022
GO:0051219	phosphoprotein binding	molecular_function	5	Shc1;Dpysl3	2	451	12	4090	0.388022
GO:0070840	dynein complex binding	molecular_function	5	Cenpf;Gpsm2	2	451	12	4090	0.388022
GO:0051493	regulation of cytoskeleton organization	biological_process	8	Spef1l;Stmn1	2	451	12	4090	0.388022
GO:0048666	neuron development	biological_process	6	Mef2c;Dpysl3	2	451	12	4090	0.388022
GO:0051781	positive regulation of cell division	biological_process	7	Htr2b;Fgf9	2	451	12	4090	0.388022
GO:0043539	protein serine/threonine kinase activator activity	molecular_function	8	Incenp;Cdk5r1	2	451	12	4090	0.388022
GO:0098869	cellular oxidant detoxification	biological_process	5	Prdx5;Rp1	2	451	12	4090	0.388022
GO:0045596	negative regulation of cell differentiation	biological_process	7	Gdf11;P2ry12	2	451	12	4090	0.388022
GO:0007616	long-term memory	biological_process	6	Arc;Camk4	2	451	12	4090	0.388022
GO:0002062	chondrocyte differentiation	biological_process	6	Mef2c;Fgf9	2	451	12	4090	0.388022
GO:0008284	positive regulation of cell population proliferation	biological_process	7	Sox11;Prox1;Slc35f6;E2f3;Fgf9;Sphk2;Has2;Pgr;Grn;Cnot7;Carm1;Tnc;Lef1;Shc1;Htr2b	15	451	124	4090	0.392024
GO:0007568	aging	biological_process	4	Carm1;mt-Nd4;Lrp1;Adra1a;Gclc;Shc1	6	451	46	4090	0.397261
GO:0034097	response to cytokine	biological_process	6	Ppp3cb;Serpina1b;Ddost;Cxcl16	4	451	29	4090	0.399474
GO:0060070	canonical Wnt signaling pathway	biological_process	8	Frat1;Fzd2;Fzd10;Lef1	4	451	29	4090	0.399474
GO:0007605	sensory perception of sound	biological_process	8	Alms1;Tfap2a;Myo1a;Atp8b1	4	451	29	4090	0.399474
GO:0016604	nuclear body	cellular_component	7	Impad1;Pcgf2;Rad18;Mki67;Cnot7;Tcf20;Atp8b1;Ptk6;Ngrn;Incenp;A530032D15Rik;Sp140	12	451	99	4090	0.409739
GO:0006909	phagocytosis	biological_process	7	Cebpe;Pld4;Lrp1	3	451	21	4090	0.413009
GO:0034765	regulation of ion transmembrane transport	biological_process	8	Kcnk12;Kcng1;Kcne3	3	451	21	4090	0.413009
GO:0045860	positive regulation of protein kinase activity	biological_process	11	Axin2;Adipoq;Cdk5r1	3	451	21	4090	0.413009
GO:0071333	cellular response to glucose stimulus	biological_process	10	Gclc;Unc13b;Cyba	3	451	21	4090	0.413009
GO:0070373	negative regulation of ERK1 and ERK2 cascade	biological_process	12	Wnk2;Spry1;Adipoq	3	451	21	4090	0.413009
GO:0051082	unfolded protein binding	molecular_function	5	Scg5;St13;Pfdn1	3	451	21	4090	0.413009
GO:0043005	neuron projection	cellular_component	5	Stmn1;Nectin1;Pgr;Syt13;Lzts1;Atp2b4;Snph;Pclo;Cdk5r1;Hnrnpa3;Kcnn4;Bdkrb1;Bcl11b;Myo1a;Htr2b	15	451	126	4090	0.41713
GO:0000922	spindle pole	cellular_component	6	Rassf10;Cenpf;Gpsm2;Alms1;Aunip;Tubgcp6	6	451	47	4090	0.417857
GO:0016525	negative regulation of angiogenesis	biological_process	8	Atp2b4;Ccr2;Foxc1;Shc1	4	451	30	4090	0.425472
GO:0120162	positive regulation of cold-induced thermogenesis	biological_process	7	Adipoq;Ccr2;Alms1;Zbtb7b	4	451	30	4090	0.425472
GO:0032508	DNA duplex unwinding	biological_process	9	Rtel1;Trex1;Rad18;Recql	4	451	30	4090	0.425472
GO:0007166	cell surface receptor signaling pathway	biological_process	5	Cd8a;Fcrls;Fzd10;Fzd2	4	451	30	4090	0.425472
GO:0004888	transmembrane signaling receptor activity	molecular_function	5	Fzd2;Fzd10;Lyve1;Fcrls	4	451	30	4090	0.425472
GO:0030154	cell differentiation	biological_process	5	Fgf9;Txndc8;Syne1;Cfap69;Arhgap24;Foxq1;Ambra1;Sqstm1;Mycbpap;Sox11;Ggn;Ngrn;Zbtb7b;Paqr7;Jhy;Tssk1;Stmn1;Ptk6;Foxc1;Mef2c;Ccdc87	21	451	180	4090	0.425959
GO:0005819	spindle	cellular_component	6	Syne1;Tppp;Incenp;Cenpf;Haspin;Ska2;Mical3;Kifc1	8	451	65	4090	0.427628
GO:0008289	lipid binding	molecular_function	4	Wipi1;Dbil5;Paqr9;Stard9;Pgr;Paqr7;Gramd1b;Ffar1	8	451	65	4090	0.427628
GO:0051281	positive regulation of release of sequestered calcium ion into cytosol	biological_process	15	Trdn;Bdkrb1	2	451	13	4090	0.428451
GO:0030855	epithelial cell differentiation	biological_process	6	Rpsa;Fzd2	2	451	13	4090	0.428451
GO:0001541	ovarian follicle development	biological_process	6	Foxc1;Inha	2	451	13	4090	0.428451
GO:0051924	regulation of calcium ion transport	biological_process	9	Pln;P2ry12	2	451	13	4090	0.428451
GO:0071108	protein K48-linked deubiquitination	biological_process	10	Usp9x;Vcpip1	2	451	13	4090	0.428451
GO:0001750	photoreceptor outer segment	cellular_component	5	Rp1;Inha	2	451	13	4090	0.428451
GO:0000422	autophagy of mitochondrion	biological_process	7	Wipi1;Ambra1	2	451	13	4090	0.428451
GO:0042110	T cell activation	biological_process	7	Ddost;Cd8a	2	451	13	4090	0.428451
GO:0006605	protein targeting	biological_process	11	Akap5;Syngr1	2	451	13	4090	0.428451
GO:1901998	toxin transport	biological_process	6	Slc29a4;Rab43	2	451	13	4090	0.428451
GO:0022604	regulation of cell morphogenesis	biological_process	7	Arc;Cldn4	2	451	13	4090	0.428451
GO:0045429	positive regulation of nitric oxide biosynthetic process	biological_process	9	Hrh1;Ulbp1	2	451	13	4090	0.428451
GO:0034260	negative regulation of GTPase activity	biological_process	8	Fzd10;Spry1	2	451	13	4090	0.428451
GO:0051959	dynein light intermediate chain binding	molecular_function	5	Ccdc88b;Dnhd1	2	451	13	4090	0.428451
GO:0050766	positive regulation of phagocytosis	biological_process	8	Lrp1;Cyba	2	451	13	4090	0.428451
GO:0003684	damaged DNA binding	molecular_function	7	Neil2;Aunip	2	451	13	4090	0.428451
GO:2001237	negative regulation of extrinsic apoptotic signaling pathway	biological_process	10	Gclc;Il7	2	451	13	4090	0.428451
GO:0009055	electron transfer activity	molecular_function	5	Cycs;Cyba	2	451	13	4090	0.428451
GO:0038023	signaling receptor activity	molecular_function	4	Trem1;Paqr7;Nectin1;Gm21188;Paqr9	5	451	39	4090	0.433129
GO:0009617	response to bacterium	biological_process	7	Adipoq;Ifi202b;Tent5a;St13;Trdn;Saa3	6	451	48	4090	0.438368
GO:1900242	regulation of synaptic vesicle endocytosis	biological_process	8	Ppp3cb	1	451	5	4090	0.442606
GO:0043586	tongue development	biological_process	7	Lef1	1	451	5	4090	0.442606
GO:0005149	interleukin-1 receptor binding	molecular_function	7	Irak4	1	451	5	4090	0.442606
GO:0061809	NAD+ nucleotidase, cyclic ADP-ribose generating	molecular_function	8	Il18r1	1	451	5	4090	0.442606
GO:0016018	cyclosporin A binding	molecular_function	5	Ppih	1	451	5	4090	0.442606
GO:0071732	cellular response to nitric oxide	biological_process	8	Hnrnpd	1	451	5	4090	0.442606
GO:0070371	ERK1 and ERK2 cascade	biological_process	12	Htr2b	1	451	5	4090	0.442606
GO:0045598	regulation of fat cell differentiation	biological_process	7	Alms1	1	451	5	4090	0.442606
GO:0033630	positive regulation of cell adhesion mediated by integrin	biological_process	7	P2ry12	1	451	5	4090	0.442606
GO:0045056	transcytosis	biological_process	7	Ptafr	1	451	5	4090	0.442606
GO:0019933	cAMP-mediated signaling	biological_process	8	Pclo	1	451	5	4090	0.442606
GO:0001103	RNA polymerase II repressing transcription factor binding	molecular_function	8	Bbs10	1	451	5	4090	0.442606
GO:0009966	regulation of signal transduction	biological_process	7	Spry1	1	451	5	4090	0.442606
GO:0006891	intra-Golgi vesicle-mediated transport	biological_process	8	Nsf	1	451	5	4090	0.442606
GO:0060402	calcium ion transport into cytosol	biological_process	14	Adra1a	1	451	5	4090	0.442606
GO:0035050	embryonic heart tube development	biological_process	6	Foxc1	1	451	5	4090	0.442606
GO:0045580	regulation of T cell differentiation	biological_process	9	Ccr2	1	451	5	4090	0.442606
GO:0051290	protein heterotetramerization	biological_process	9	Rrm2	1	451	5	4090	0.442606
GO:0043015	gamma-tubulin binding	molecular_function	7	Tubgcp6	1	451	5	4090	0.442606
GO:0045830	positive regulation of isotype switching	biological_process	10	Kmt5b	1	451	5	4090	0.442606
GO:0045120	pronucleus	cellular_component	7	Cenpf	1	451	5	4090	0.442606
GO:0008373	sialyltransferase activity	molecular_function	6	St6gal1	1	451	5	4090	0.442606
GO:0010739	positive regulation of protein kinase A signaling	biological_process	10	Adipoq	1	451	5	4090	0.442606
GO:0000289	nuclear-transcribed mRNA poly(A) tail shortening	biological_process	12	Cnot7	1	451	5	4090	0.442606
GO:2000727	positive regulation of cardiac muscle cell differentiation	biological_process	10	Mef2c	1	451	5	4090	0.442606
GO:0005686	U2 snRNP	cellular_component	8	Sf3a3	1	451	5	4090	0.442606
GO:0015935	small ribosomal subunit	cellular_component	7	Rpsa	1	451	5	4090	0.442606
GO:0003084	positive regulation of systemic arterial blood pressure	biological_process	7	Adra1a	1	451	5	4090	0.442606
GO:0033173	calcineurin-NFAT signaling cascade	biological_process	8	Ppp3cb	1	451	5	4090	0.442606
GO:0031492	nucleosomal DNA binding	molecular_function	8	Gm10282	1	451	5	4090	0.442606
GO:0102567	phospholipase A2 activity (consuming 1,2-dipalmitoylphosphatidylcholine)	molecular_function	7	Pla2g6	1	451	5	4090	0.442606
GO:0004623	phospholipase A2 activity	molecular_function	8	Pla2g6	1	451	5	4090	0.442606
GO:0051131	chaperone-mediated protein complex assembly	biological_process	8	Bbs10	1	451	5	4090	0.442606
GO:0086004	regulation of cardiac muscle cell contraction	biological_process	11	Pln	1	451	5	4090	0.442606
GO:0006930	substrate-dependent cell migration, cell extension	biological_process	8	P2ry12	1	451	5	4090	0.442606
GO:0031103	axon regeneration	biological_process	7	Dhfr	1	451	5	4090	0.442606
GO:0031143	pseudopodium	cellular_component	6	Pla2g6	1	451	5	4090	0.442606
GO:0016620	oxidoreductase activity, acting on the aldehyde or oxo group of donors, NAD or NADP as acceptor	molecular_function	6	Aldh4a1	1	451	5	4090	0.442606
GO:0042101	T cell receptor complex	cellular_component	6	Alcam	1	451	5	4090	0.442606
GO:0006268	DNA unwinding involved in DNA replication	biological_process	10	Recql	1	451	5	4090	0.442606
GO:0046620	regulation of organ growth	biological_process	7	Foxc1	1	451	5	4090	0.442606
GO:0000062	fatty-acyl-CoA binding	molecular_function	9	Dbil5	1	451	5	4090	0.442606
GO:1990869	cellular response to chemokine	biological_process	8	Foxc1	1	451	5	4090	0.442606
GO:0006801	superoxide metabolic process	biological_process	6	Cyba	1	451	5	4090	0.442606
GO:0010863	positive regulation of phospholipase C activity	biological_process	10	Ptafr	1	451	5	4090	0.442606
GO:0019013	viral nucleocapsid	cellular_component	4	Hnrnpa3	1	451	5	4090	0.442606
GO:0097503	sialylation	biological_process	7	St6gal1	1	451	5	4090	0.442606
GO:0102568	phospholipase A2 activity consuming 1,2-dioleoylphosphatidylethanolamine)	molecular_function	7	Pla2g6	1	451	5	4090	0.442606
[truncated: 1,108 more rows]
